# Supplementary material for: Desiccation resistance differences in Drosophila species can be largely explained by variations in cuticular hydrocarbons
Source: eLife. 2022 Dec 6;11:e80859. doi: 10.7554/eLife.80859 (PMC9757832; doi:10.7554/eLife.80859)
Supplement: Figure 5—source data 1. [file elife-80859-fig5-data1.xlsx]

## Sheet: Desiccation_mbCHC_attP40
Figure 5 - Source data 2: Desiccation resistance of Drosophila melanogaster attP40 flies when coated with individual mbCHC of 2MeC26, 2MeC28, and 2MeC30
Obs (Randomized)	Trt	Label	Sex	Desiccation (h)
3	2MeC28	2MeC28F2	Female	7
3	2MeC28	2MeC28F2	Female	10
3	2MeC28	2MeC28F2	Female	10
3	2MeC28	2MeC28F2	Female	11
3	2MeC28	2MeC28F2	Female	11
3	2MeC28	2MeC28F2	Female	11
3	2MeC28	2MeC28F2	Female	12
3	2MeC28	2MeC28F2	Female	13
3	2MeC28	2MeC28F2	Female	13
3	2MeC28	2MeC28F2	Female	14
4	2MeC30	2MeC30F2	Female	14
4	2MeC30	2MeC30F2	Female	16
4	2MeC30	2MeC30F2	Female	16
4	2MeC30	2MeC30F2	Female	16
4	2MeC30	2MeC30F2	Female	17
4	2MeC30	2MeC30F2	Female	17
4	2MeC30	2MeC30F2	Female	18
4	2MeC30	2MeC30F2	Female	18
4	2MeC30	2MeC30F2	Female	19
4	2MeC30	2MeC30F2	Female	19
5	Control	CKF5	Female	9
5	Control	CKF5	Female	10
5	Control	CKF5	Female	11
5	Control	CKF5	Female	12
5	Control	CKF5	Female	12
5	Control	CKF5	Female	13
5	Control	CKF5	Female	13
5	Control	CKF5	Female	13
5	Control	CKF5	Female	14
6	2MeC26	2MeC26F2	Female	9
6	2MeC26	2MeC26F2	Female	9
6	2MeC26	2MeC26F2	Female	10
6	2MeC26	2MeC26F2	Female	10
6	2MeC26	2MeC26F2	Female	10
6	2MeC26	2MeC26F2	Female	11
6	2MeC26	2MeC26F2	Female	11
6	2MeC26	2MeC26F2	Female	11
6	2MeC26	2MeC26F2	Female	11
6	2MeC26	2MeC26F2	Female	12
7	2MeC28	2MeC28F1	Female	10
7	2MeC28	2MeC28F1	Female	13
7	2MeC28	2MeC28F1	Female	14
7	2MeC28	2MeC28F1	Female	14
7	2MeC28	2MeC28F1	Female	14
7	2MeC28	2MeC28F1	Female	15
7	2MeC28	2MeC28F1	Female	15
7	2MeC28	2MeC28F1	Female	16
7	2MeC28	2MeC28F1	Female	16
8	2MeC28	2MeC28F3	Female	10
8	2MeC28	2MeC28F3	Female	13
8	2MeC28	2MeC28F3	Female	13
8	2MeC28	2MeC28F3	Female	13
8	2MeC28	2MeC28F3	Female	14
8	2MeC28	2MeC28F3	Female	14
8	2MeC28	2MeC28F3	Female	14
8	2MeC28	2MeC28F3	Female	14
8	2MeC28	2MeC28F3	Female	15
8	2MeC28	2MeC28F3	Female	16
9	Control	CKF3	Female	10
9	Control	CKF3	Female	10
9	Control	CKF3	Female	11
9	Control	CKF3	Female	11
9	Control	CKF3	Female	11
9	Control	CKF3	Female	12
9	Control	CKF3	Female	12
9	Control	CKF3	Female	12
9	Control	CKF3	Female	12
9	Control	CKF3	Female	13
10	2MeC30	2MeC30F1	Female	13
10	2MeC30	2MeC30F1	Female	14
10	2MeC30	2MeC30F1	Female	14
10	2MeC30	2MeC30F1	Female	15
10	2MeC30	2MeC30F1	Female	15
10	2MeC30	2MeC30F1	Female	16
10	2MeC30	2MeC30F1	Female	16
10	2MeC30	2MeC30F1	Female	16
10	2MeC30	2MeC30F1	Female	17
10	2MeC30	2MeC30F1	Female	17
11	2MeC26	2MeC26F1	Female	10
11	2MeC26	2MeC26F1	Female	10
11	2MeC26	2MeC26F1	Female	10
11	2MeC26	2MeC26F1	Female	11
11	2MeC26	2MeC26F1	Female	12
11	2MeC26	2MeC26F1	Female	12
11	2MeC26	2MeC26F1	Female	13
11	2MeC26	2MeC26F1	Female	13
11	2MeC26	2MeC26F1	Female	14
12	2MeC30	2MeC30F4	Female	9
12	2MeC30	2MeC30F4	Female	10
12	2MeC30	2MeC30F4	Female	12
12	2MeC30	2MeC30F4	Female	14
12	2MeC30	2MeC30F4	Female	14
12	2MeC30	2MeC30F4	Female	14
12	2MeC30	2MeC30F4	Female	14
12	2MeC30	2MeC30F4	Female	15
12	2MeC30	2MeC30F4	Female	15
12	2MeC30	2MeC30F4	Female	16
12	2MeC30	2MeC30F4	Female	17
13	2MeC28	2MeC28F4	Female	9
13	2MeC28	2MeC28F4	Female	10
13	2MeC28	2MeC28F4	Female	10
13	2MeC28	2MeC28F4	Female	10
13	2MeC28	2MeC28F4	Female	11
13	2MeC28	2MeC28F4	Female	11
13	2MeC28	2MeC28F4	Female	11
13	2MeC28	2MeC28F4	Female	12
13	2MeC28	2MeC28F4	Female	13
14	Control	CKF1	Female	10
14	Control	CKF1	Female	11
14	Control	CKF1	Female	11
14	Control	CKF1	Female	12
14	Control	CKF1	Female	12
14	Control	CKF1	Female	12
14	Control	CKF1	Female	12
14	Control	CKF1	Female	12
14	Control	CKF1	Female	13
15	2MeC28	2MeC28F5	Female	10
15	2MeC28	2MeC28F5	Female	11
15	2MeC28	2MeC28F5	Female	11
15	2MeC28	2MeC28F5	Female	12
15	2MeC28	2MeC28F5	Female	12
15	2MeC28	2MeC28F5	Female	12
15	2MeC28	2MeC28F5	Female	13
15	2MeC28	2MeC28F5	Female	13
15	2MeC28	2MeC28F5	Female	13
15	2MeC28	2MeC28F5	Female	14
16	2MeC26	2MeC26F3	Female	9
16	2MeC26	2MeC26F3	Female	9
16	2MeC26	2MeC26F3	Female	10
16	2MeC26	2MeC26F3	Female	10
16	2MeC26	2MeC26F3	Female	10
16	2MeC26	2MeC26F3	Female	11
16	2MeC26	2MeC26F3	Female	11
16	2MeC26	2MeC26F3	Female	11
16	2MeC26	2MeC26F3	Female	12
16	2MeC26	2MeC26F3	Female	12
17	2MeC26	2MeC26F4	Female	9
17	2MeC26	2MeC26F4	Female	9
17	2MeC26	2MeC26F4	Female	10
17	2MeC26	2MeC26F4	Female	10
17	2MeC26	2MeC26F4	Female	10
17	2MeC26	2MeC26F4	Female	10
17	2MeC26	2MeC26F4	Female	10
17	2MeC26	2MeC26F4	Female	10
17	2MeC26	2MeC26F4	Female	11
17	2MeC26	2MeC26F4	Female	12
18	2MeC30	2MeC30F5	Female	14
18	2MeC30	2MeC30F5	Female	15
18	2MeC30	2MeC30F5	Female	16
18	2MeC30	2MeC30F5	Female	16
18	2MeC30	2MeC30F5	Female	17
18	2MeC30	2MeC30F5	Female	17
18	2MeC30	2MeC30F5	Female	17
18	2MeC30	2MeC30F5	Female	18
18	2MeC30	2MeC30F5	Female	19
19	2MeC26	2MeC26F5	Female	7
19	2MeC26	2MeC26F5	Female	10
19	2MeC26	2MeC26F5	Female	11
19	2MeC26	2MeC26F5	Female	11
19	2MeC26	2MeC26F5	Female	11
19	2MeC26	2MeC26F5	Female	11
19	2MeC26	2MeC26F5	Female	11
19	2MeC26	2MeC26F5	Female	12
19	2MeC26	2MeC26F5	Female	12
19	2MeC26	2MeC26F5	Female	13
20	Control	CKF4	Female	10
20	Control	CKF4	Female	11
20	Control	CKF4	Female	12
20	Control	CKF4	Female	12
20	Control	CKF4	Female	12
20	Control	CKF4	Female	12
20	Control	CKF4	Female	12
20	Control	CKF4	Female	13
20	Control	CKF4	Female	13
21	2MeC30	2MeC30F3	Female	12
21	2MeC30	2MeC30F3	Female	13
21	2MeC30	2MeC30F3	Female	13
21	2MeC30	2MeC30F3	Female	15
21	2MeC30	2MeC30F3	Female	16
21	2MeC30	2MeC30F3	Female	16
21	2MeC30	2MeC30F3	Female	16
21	2MeC30	2MeC30F3	Female	16
21	2MeC30	2MeC30F3	Female	17
21	2MeC30	2MeC30F3	Female	18
22	Control	CKF2	Female	9
22	Control	CKF2	Female	10
22	Control	CKF2	Female	10
22	Control	CKF2	Female	10
22	Control	CKF2	Female	10
22	Control	CKF2	Female	12
22	Control	CKF2	Female	12
22	Control	CKF2	Female	13
22	Control	CKF2	Female	13
24	2MeC28	2MeC28M4	Male	7
24	2MeC28	2MeC28M4	Male	7
24	2MeC28	2MeC28M4	Male	7
24	2MeC28	2MeC28M4	Male	8
24	2MeC28	2MeC28M4	Male	8
24	2MeC28	2MeC28M4	Male	8
24	2MeC28	2MeC28M4	Male	8
24	2MeC28	2MeC28M4	Male	8
24	2MeC28	2MeC28M4	Male	9
24	2MeC28	2MeC28M4	Male	9
25	2MeC26	2MeC26M3	Male	7
25	2MeC26	2MeC26M3	Male	7
25	2MeC26	2MeC26M3	Male	7
25	2MeC26	2MeC26M3	Male	7
25	2MeC26	2MeC26M3	Male	8
25	2MeC26	2MeC26M3	Male	8
25	2MeC26	2MeC26M3	Male	8
25	2MeC26	2MeC26M3	Male	8
25	2MeC26	2MeC26M3	Male	8
25	2MeC26	2MeC26M3	Male	9
26	2MeC30	2MeC30M3	Male	8
26	2MeC30	2MeC30M3	Male	9
26	2MeC30	2MeC30M3	Male	9
26	2MeC30	2MeC30M3	Male	9
26	2MeC30	2MeC30M3	Male	9
26	2MeC30	2MeC30M3	Male	10
26	2MeC30	2MeC30M3	Male	11
26	2MeC30	2MeC30M3	Male	11
26	2MeC30	2MeC30M3	Male	11
26	2MeC30	2MeC30M3	Male	12
26	2MeC30	2MeC30M3	Male	14
27	2MeC26	2MeC26M1	Male	7
27	2MeC26	2MeC26M1	Male	8
27	2MeC26	2MeC26M1	Male	9
27	2MeC26	2MeC26M1	Male	9
27	2MeC26	2MeC26M1	Male	10
27	2MeC26	2MeC26M1	Male	10
27	2MeC26	2MeC26M1	Male	10
27	2MeC26	2MeC26M1	Male	10
27	2MeC26	2MeC26M1	Male	10
27	2MeC26	2MeC26M1	Male	10
28	2MeC28	2MeC28M1	Male	9
28	2MeC28	2MeC28M1	Male	10
28	2MeC28	2MeC28M1	Male	10
28	2MeC28	2MeC28M1	Male	10
28	2MeC28	2MeC28M1	Male	10
28	2MeC28	2MeC28M1	Male	11
28	2MeC28	2MeC28M1	Male	12
28	2MeC28	2MeC28M1	Male	13
28	2MeC28	2MeC28M1	Male	13
29	2MeC30	2MeC30M1	Male	9
29	2MeC30	2MeC30M1	Male	10
29	2MeC30	2MeC30M1	Male	11
29	2MeC30	2MeC30M1	Male	11
29	2MeC30	2MeC30M1	Male	11
29	2MeC30	2MeC30M1	Male	11
29	2MeC30	2MeC30M1	Male	12
29	2MeC30	2MeC30M1	Male	13
29	2MeC30	2MeC30M1	Male	13
30	2MeC26	2MeC26M4	Male	9
30	2MeC26	2MeC26M4	Male	9
30	2MeC26	2MeC26M4	Male	9
30	2MeC26	2MeC26M4	Male	10
30	2MeC26	2MeC26M4	Male	10
30	2MeC26	2MeC26M4	Male	10
30	2MeC26	2MeC26M4	Male	10
30	2MeC26	2MeC26M4	Male	10
30	2MeC26	2MeC26M4	Male	11
31	2MeC28	2MeC28M3	Male	8
31	2MeC28	2MeC28M3	Male	9
31	2MeC28	2MeC28M3	Male	10
31	2MeC28	2MeC28M3	Male	11
31	2MeC28	2MeC28M3	Male	11
31	2MeC28	2MeC28M3	Male	12
31	2MeC28	2MeC28M3	Male	12
31	2MeC28	2MeC28M3	Male	13
31	2MeC28	2MeC28M3	Male	13
31	2MeC28	2MeC28M3	Male	13
32	Control	CKM4	Male	8
32	Control	CKM4	Male	8
32	Control	CKM4	Male	8
32	Control	CKM4	Male	8
32	Control	CKM4	Male	8
32	Control	CKM4	Male	9
32	Control	CKM4	Male	9
32	Control	CKM4	Male	9
32	Control	CKM4	Male	10
32	Control	CKM4	Male	10
33	2MeC26	2MeC26M5	Male	4
33	2MeC26	2MeC26M5	Male	8
33	2MeC26	2MeC26M5	Male	9
33	2MeC26	2MeC26M5	Male	9
33	2MeC26	2MeC26M5	Male	9
33	2MeC26	2MeC26M5	Male	10
33	2MeC26	2MeC26M5	Male	10
33	2MeC26	2MeC26M5	Male	10
33	2MeC26	2MeC26M5	Male	10
33	2MeC26	2MeC26M5	Male	11
34	2MeC30	2MeC30M4	Male	9
34	2MeC30	2MeC30M4	Male	10
34	2MeC30	2MeC30M4	Male	10
34	2MeC30	2MeC30M4	Male	10
34	2MeC30	2MeC30M4	Male	11
34	2MeC30	2MeC30M4	Male	12
34	2MeC30	2MeC30M4	Male	12
34	2MeC30	2MeC30M4	Male	13
34	2MeC30	2MeC30M4	Male	13
34	2MeC30	2MeC30M4	Male	13
35	2MeC30	2MeC30M5	Male	8
35	2MeC30	2MeC30M5	Male	9
35	2MeC30	2MeC30M5	Male	9
35	2MeC30	2MeC30M5	Male	10
35	2MeC30	2MeC30M5	Male	11
35	2MeC30	2MeC30M5	Male	12
35	2MeC30	2MeC30M5	Male	12
35	2MeC30	2MeC30M5	Male	12
35	2MeC30	2MeC30M5	Male	13
35	2MeC30	2MeC30M5	Male	13
36	2MeC28	2MeC28M5	Male	8
36	2MeC28	2MeC28M5	Male	9
36	2MeC28	2MeC28M5	Male	9
36	2MeC28	2MeC28M5	Male	9
36	2MeC28	2MeC28M5	Male	10
36	2MeC28	2MeC28M5	Male	10
36	2MeC28	2MeC28M5	Male	11
36	2MeC28	2MeC28M5	Male	12
36	2MeC28	2MeC28M5	Male	12
36	2MeC28	2MeC28M5	Male	12
37	2MeC28	2MeC28M2	Male	8
37	2MeC28	2MeC28M2	Male	9
37	2MeC28	2MeC28M2	Male	9
37	2MeC28	2MeC28M2	Male	9
37	2MeC28	2MeC28M2	Male	9
37	2MeC28	2MeC28M2	Male	9
37	2MeC28	2MeC28M2	Male	11
37	2MeC28	2MeC28M2	Male	12
37	2MeC28	2MeC28M2	Male	12
37	2MeC28	2MeC28M2	Male	13
38	2MeC30	2MeC30M2	Male	7
38	2MeC30	2MeC30M2	Male	9
38	2MeC30	2MeC30M2	Male	9
38	2MeC30	2MeC30M2	Male	9
38	2MeC30	2MeC30M2	Male	10
38	2MeC30	2MeC30M2	Male	11
38	2MeC30	2MeC30M2	Male	11
38	2MeC30	2MeC30M2	Male	11
38	2MeC30	2MeC30M2	Male	12
38	2MeC30	2MeC30M2	Male	13
39	2MeC26	2MeC26M2	Male	6
39	2MeC26	2MeC26M2	Male	7
39	2MeC26	2MeC26M2	Male	7
39	2MeC26	2MeC26M2	Male	7
39	2MeC26	2MeC26M2	Male	8
39	2MeC26	2MeC26M2	Male	8
39	2MeC26	2MeC26M2	Male	8
39	2MeC26	2MeC26M2	Male	8
39	2MeC26	2MeC26M2	Male	8
39	2MeC26	2MeC26M2	Male	10
40	Control	CKM5	Male	7
40	Control	CKM5	Male	7
40	Control	CKM5	Male	7
40	Control	CKM5	Male	8
40	Control	CKM5	Male	8
40	Control	CKM5	Male	8
40	Control	CKM5	Male	9
40	Control	CKM5	Male	9
41	Control	CKM1	Male	7
41	Control	CKM1	Male	8
41	Control	CKM1	Male	8
41	Control	CKM1	Male	8
41	Control	CKM1	Male	9
41	Control	CKM1	Male	9
41	Control	CKM1	Male	9
41	Control	CKM1	Male	9
41	Control	CKM1	Male	9
41	Control	CKM1	Male	10
42	Control	CKM2	Male	7
42	Control	CKM2	Male	7
42	Control	CKM2	Male	8
42	Control	CKM2	Male	8
42	Control	CKM2	Male	8
42	Control	CKM2	Male	9
42	Control	CKM2	Male	9
42	Control	CKM2	Male	9
42	Control	CKM2	Male	9
42	Control	CKM2	Male	10
43	Control	CKM3	Male	8
43	Control	CKM3	Male	9
43	Control	CKM3	Male	9
43	Control	CKM3	Male	9
43	Control	CKM3	Male	10
43	Control	CKM3	Male	10
43	Control	CKM3	Male	10
43	Control	CKM3	Male	10
43	Control	CKM3	Male	11
