# Supplementary material for: Desiccation resistance differences in Drosophila species can be largely explained by variations in cuticular hydrocarbons
Source: eLife. 2022 Dec 6;11:e80859. doi: 10.7554/eLife.80859 (PMC9757832; doi:10.7554/eLife.80859)
Supplement: Figure 5—source data 2. [file elife-80859-fig5-data2.xlsx]

## Sheet: Desiccation_nalkanes_attP40
Figure 5 - Source data 3: Desiccation resistance of Drosophila melanogaster attP40 flies when coated with individual n-alkane of C23, C25, C27, C29, and C31
Obs (Randomized)	Trt	Label	Sex	Desiccation
31	C23	C23M4	Male	8
31	C23	C23M4	Male	8
31	C23	C23M4	Male	8
31	C23	C23M4	Male	9
31	C23	C23M4	Male	9
31	C23	C23M4	Male	9
31	C23	C23M4	Male	9
31	C23	C23M4	Male	10
31	C23	C23M4	Male	10
31	C23	C23M4	Male	10
32	C25	C25M3	Male	7
32	C25	C25M3	Male	8
32	C25	C25M3	Male	8
32	C25	C25M3	Male	8
32	C25	C25M3	Male	9
32	C25	C25M3	Male	9
32	C25	C25M3	Male	9
32	C25	C25M3	Male	9
32	C25	C25M3	Male	10
32	C25	C25M3	Male	10
33	C31	C31M2	Male	9
33	C31	C31M2	Male	9
33	C31	C31M2	Male	9
33	C31	C31M2	Male	9
33	C31	C31M2	Male	10
33	C31	C31M2	Male	10
33	C31	C31M2	Male	10
33	C31	C31M2	Male	11
33	C31	C31M2	Male	11
33	C31	C31M2	Male	11
34	C31	C31M5	Male	7
34	C31	C31M5	Male	8
34	C31	C31M5	Male	9
34	C31	C31M5	Male	9
34	C31	C31M5	Male	10
34	C31	C31M5	Male	10
34	C31	C31M5	Male	10
34	C31	C31M5	Male	11
34	C31	C31M5	Male	11
34	C31	C31M5	Male	11
35	C27	C27M1	Male	7
35	C27	C27M1	Male	8
35	C27	C27M1	Male	8
35	C27	C27M1	Male	8
35	C27	C27M1	Male	8
35	C27	C27M1	Male	9
35	C27	C27M1	Male	9
35	C27	C27M1	Male	9
35	C27	C27M1	Male	10
36	C31	C31M1	Male	6
36	C31	C31M1	Male	7
36	C31	C31M1	Male	8
36	C31	C31M1	Male	8
36	C31	C31M1	Male	9
36	C31	C31M1	Male	9
36	C31	C31M1	Male	9
36	C31	C31M1	Male	10
36	C31	C31M1	Male	10
36	C31	C31M1	Male	10
37	C27	C27M3	Male	8
37	C27	C27M3	Male	8
37	C27	C27M3	Male	8
37	C27	C27M3	Male	9
37	C27	C27M3	Male	9
37	C27	C27M3	Male	9
37	C27	C27M3	Male	9
37	C27	C27M3	Male	9
37	C27	C27M3	Male	10
37	C27	C27M3	Male	11
38	Sham	ShamM2	Male	7
38	Sham	ShamM2	Male	7
38	Sham	ShamM2	Male	7
38	Sham	ShamM2	Male	8
38	Sham	ShamM2	Male	8
38	Sham	ShamM2	Male	8
38	Sham	ShamM2	Male	8
38	Sham	ShamM2	Male	8
38	Sham	ShamM2	Male	9
38	Sham	ShamM2	Male	9
39	C29	C29M3	Male	6
39	C29	C29M3	Male	8
39	C29	C29M3	Male	8
39	C29	C29M3	Male	9
39	C29	C29M3	Male	9
39	C29	C29M3	Male	9
39	C29	C29M3	Male	9
39	C29	C29M3	Male	10
39	C29	C29M3	Male	10
39	C29	C29M3	Male	10
40	C29	C29M4	Male	8
40	C29	C29M4	Male	8
40	C29	C29M4	Male	8
40	C29	C29M4	Male	9
40	C29	C29M4	Male	9
40	C29	C29M4	Male	9
40	C29	C29M4	Male	10
40	C29	C29M4	Male	10
41	C29	C29M1	Male	8
41	C29	C29M1	Male	8
41	C29	C29M1	Male	8
41	C29	C29M1	Male	9
41	C29	C29M1	Male	9
41	C29	C29M1	Male	9
41	C29	C29M1	Male	9
41	C29	C29M1	Male	10
41	C29	C29M1	Male	10
41	C29	C29M1	Male	12
42	C27	C27M2	Male	9
42	C27	C27M2	Male	9
42	C27	C27M2	Male	9
42	C27	C27M2	Male	9
42	C27	C27M2	Male	9
42	C27	C27M2	Male	11
42	C27	C27M2	Male	11
42	C27	C27M2	Male	11
42	C27	C27M2	Male	12
43	C27	C27M5	Male	6
43	C27	C27M5	Male	7
43	C27	C27M5	Male	7
43	C27	C27M5	Male	8
43	C27	C27M5	Male	8
43	C27	C27M5	Male	8
43	C27	C27M5	Male	9
43	C27	C27M5	Male	10
43	C27	C27M5	Male	10
43	C27	C27M5	Male	11
44	C27	C27M4	Male	8
44	C27	C27M4	Male	9
44	C27	C27M4	Male	9
44	C27	C27M4	Male	9
44	C27	C27M4	Male	9
44	C27	C27M4	Male	10
44	C27	C27M4	Male	10
44	C27	C27M4	Male	10
44	C27	C27M4	Male	11
44	C27	C27M4	Male	12
45	Sham	ShamM1	Male	7
45	Sham	ShamM1	Male	8
45	Sham	ShamM1	Male	8
45	Sham	ShamM1	Male	8
45	Sham	ShamM1	Male	9
45	Sham	ShamM1	Male	9
45	Sham	ShamM1	Male	9
45	Sham	ShamM1	Male	9
45	Sham	ShamM1	Male	9
46	C23	C23M1	Male	6
46	C23	C23M1	Male	8
46	C23	C23M1	Male	8
46	C23	C23M1	Male	9
46	C23	C23M1	Male	9
46	C23	C23M1	Male	9
46	C23	C23M1	Male	10
46	C23	C23M1	Male	10
46	C23	C23M1	Male	10
47	C23	C23M5	Male	7
47	C23	C23M5	Male	8
47	C23	C23M5	Male	8
47	C23	C23M5	Male	8
47	C23	C23M5	Male	9
47	C23	C23M5	Male	9
47	C23	C23M5	Male	10
47	C23	C23M5	Male	11
47	C23	C23M5	Male	11
47	C23	C23M5	Male	12
48	C25	C25M4	Male	7
48	C25	C25M4	Male	7
48	C25	C25M4	Male	7
48	C25	C25M4	Male	8
48	C25	C25M4	Male	8
48	C25	C25M4	Male	9
48	C25	C25M4	Male	9
48	C25	C25M4	Male	9
48	C25	C25M4	Male	10
48	C25	C25M4	Male	11
49	Sham	ShamM4	Male	6
49	Sham	ShamM4	Male	8
49	Sham	ShamM4	Male	8
49	Sham	ShamM4	Male	8
49	Sham	ShamM4	Male	8
49	Sham	ShamM4	Male	9
49	Sham	ShamM4	Male	9
49	Sham	ShamM4	Male	9
49	Sham	ShamM4	Male	9
49	Sham	ShamM4	Male	9
50	C23	C23M2	Male	8
50	C23	C23M2	Male	8
50	C23	C23M2	Male	8
50	C23	C23M2	Male	8
50	C23	C23M2	Male	9
50	C23	C23M2	Male	9
50	C23	C23M2	Male	9
50	C23	C23M2	Male	9
50	C23	C23M2	Male	10
50	C23	C23M2	Male	10
51	Sham	ShamM5	Male	6
51	Sham	ShamM5	Male	7
51	Sham	ShamM5	Male	8
51	Sham	ShamM5	Male	8
51	Sham	ShamM5	Male	8
51	Sham	ShamM5	Male	8
51	Sham	ShamM5	Male	9
51	Sham	ShamM5	Male	9
51	Sham	ShamM5	Male	9
51	Sham	ShamM5	Male	9
52	C31	C31M4	Male	8
52	C31	C31M4	Male	9
52	C31	C31M4	Male	9
52	C31	C31M4	Male	9
52	C31	C31M4	Male	9
52	C31	C31M4	Male	10
52	C31	C31M4	Male	10
52	C31	C31M4	Male	10
52	C31	C31M4	Male	11
52	C31	C31M4	Male	11
53	C23	C23M3	Male	8
53	C23	C23M3	Male	8
53	C23	C23M3	Male	8
53	C23	C23M3	Male	9
53	C23	C23M3	Male	9
53	C23	C23M3	Male	9
53	C23	C23M3	Male	10
53	C23	C23M3	Male	10
53	C23	C23M3	Male	11
53	C23	C23M3	Male	11
54	Sham	ShamM3	Male	6
54	Sham	ShamM3	Male	7
54	Sham	ShamM3	Male	8
54	Sham	ShamM3	Male	8
54	Sham	ShamM3	Male	8
54	Sham	ShamM3	Male	9
54	Sham	ShamM3	Male	9
54	Sham	ShamM3	Male	9
54	Sham	ShamM3	Male	9
54	Sham	ShamM3	Male	10
55	C25	C25M1	Male	6
55	C25	C25M1	Male	7
55	C25	C25M1	Male	8
55	C25	C25M1	Male	8
55	C25	C25M1	Male	8
55	C25	C25M1	Male	9
55	C25	C25M1	Male	9
55	C25	C25M1	Male	9
55	C25	C25M1	Male	9
55	C25	C25M1	Male	10
56	C29	C29M2	Male	6
56	C29	C29M2	Male	8
56	C29	C29M2	Male	8
56	C29	C29M2	Male	9
56	C29	C29M2	Male	9
56	C29	C29M2	Male	9
56	C29	C29M2	Male	9
56	C29	C29M2	Male	10
56	C29	C29M2	Male	10
56	C29	C29M2	Male	10
57	C29	C29M5	Male	8
57	C29	C29M5	Male	9
57	C29	C29M5	Male	9
57	C29	C29M5	Male	9
57	C29	C29M5	Male	9
57	C29	C29M5	Male	9
57	C29	C29M5	Male	10
57	C29	C29M5	Male	10
57	C29	C29M5	Male	10
57	C29	C29M5	Male	11
58	C31	C31M3	Male	6
58	C31	C31M3	Male	8
58	C31	C31M3	Male	8
58	C31	C31M3	Male	8
58	C31	C31M3	Male	9
58	C31	C31M3	Male	9
58	C31	C31M3	Male	10
58	C31	C31M3	Male	10
58	C31	C31M3	Male	10
58	C31	C31M3	Male	11
59	C25	C25M2	Male	6
59	C25	C25M2	Male	7
59	C25	C25M2	Male	8
59	C25	C25M2	Male	8
59	C25	C25M2	Male	8
59	C25	C25M2	Male	8
59	C25	C25M2	Male	9
59	C25	C25M2	Male	9
59	C25	C25M2	Male	9
59	C25	C25M2	Male	10
60	C25	C25M5	Male	6
60	C25	C25M5	Male	6
60	C25	C25M5	Male	6
60	C25	C25M5	Male	7
60	C25	C25M5	Male	8
60	C25	C25M5	Male	8
60	C25	C25M5	Male	9
60	C25	C25M5	Male	9
60	C25	C25M5	Male	9
1	C23	C23F2	Female	9
1	C23	C23F2	Female	9
1	C23	C23F2	Female	10
1	C23	C23F2	Female	11
1	C23	C23F2	Female	11
1	C23	C23F2	Female	12
1	C23	C23F2	Female	14
1	C23	C23F2	Female	14
1	C23	C23F2	Female	14
2	C27	C27F1	Female	9
2	C27	C27F1	Female	9
2	C27	C27F1	Female	11
2	C27	C27F1	Female	11
2	C27	C27F1	Female	11
2	C27	C27F1	Female	12
2	C27	C27F1	Female	12
2	C27	C27F1	Female	12
2	C27	C27F1	Female	14
2	C27	C27F1	Female	14
3	C31	C31F1	Female	12
3	C31	C31F1	Female	12
3	C31	C31F1	Female	13
3	C31	C31F1	Female	14
3	C31	C31F1	Female	15
3	C31	C31F1	Female	15
3	C31	C31F1	Female	15
3	C31	C31F1	Female	16
3	C31	C31F1	Female	17
3	C31	C31F1	Female	18
4	C23	C23F5	Female	10
4	C23	C23F5	Female	11
4	C23	C23F5	Female	11
4	C23	C23F5	Female	11
4	C23	C23F5	Female	12
4	C23	C23F5	Female	12
4	C23	C23F5	Female	13
4	C23	C23F5	Female	14
4	C23	C23F5	Female	14
5	Sham	ShamF3	Female	9
5	Sham	ShamF3	Female	9
5	Sham	ShamF3	Female	9
5	Sham	ShamF3	Female	9
5	Sham	ShamF3	Female	10
5	Sham	ShamF3	Female	10
5	Sham	ShamF3	Female	10
5	Sham	ShamF3	Female	11
5	Sham	ShamF3	Female	12
6	C29	C29F5	Female	10
6	C29	C29F5	Female	11
6	C29	C29F5	Female	12
6	C29	C29F5	Female	12
6	C29	C29F5	Female	13
6	C29	C29F5	Female	13
6	C29	C29F5	Female	13
6	C29	C29F5	Female	14
6	C29	C29F5	Female	15
7	C29	C29F3	Female	10
7	C29	C29F3	Female	10
7	C29	C29F3	Female	11
7	C29	C29F3	Female	12
7	C29	C29F3	Female	12
7	C29	C29F3	Female	12
7	C29	C29F3	Female	12
7	C29	C29F3	Female	13
7	C29	C29F3	Female	15
7	C29	C29F3	Female	16
8	C31	C31F3	Female	10
8	C31	C31F3	Female	11
8	C31	C31F3	Female	11
8	C31	C31F3	Female	12
8	C31	C31F3	Female	13
8	C31	C31F3	Female	14
8	C31	C31F3	Female	14
8	C31	C31F3	Female	14
8	C31	C31F3	Female	15
8	C31	C31F3	Female	17
8	C31	C31F3	Female	18
9	C29	C29F4	Female	8
9	C29	C29F4	Female	11
9	C29	C29F4	Female	11
9	C29	C29F4	Female	13
9	C29	C29F4	Female	14
9	C29	C29F4	Female	14
9	C29	C29F4	Female	15
9	C29	C29F4	Female	16
9	C29	C29F4	Female	17
10	C31	C31F4	Female	9
10	C31	C31F4	Female	10
10	C31	C31F4	Female	11
10	C31	C31F4	Female	12
10	C31	C31F4	Female	12
10	C31	C31F4	Female	12
10	C31	C31F4	Female	12
10	C31	C31F4	Female	13
10	C31	C31F4	Female	14
10	C31	C31F4	Female	15
11	C31	C31F5	Female	12
11	C31	C31F5	Female	12
11	C31	C31F5	Female	12
11	C31	C31F5	Female	12
11	C31	C31F5	Female	13
11	C31	C31F5	Female	14
11	C31	C31F5	Female	14
11	C31	C31F5	Female	15
11	C31	C31F5	Female	16
11	C31	C31F5	Female	17
12	C25	C25F5	Female	6
12	C25	C25F5	Female	8
12	C25	C25F5	Female	9
12	C25	C25F5	Female	9
12	C25	C25F5	Female	10
12	C25	C25F5	Female	10
12	C25	C25F5	Female	11
12	C25	C25F5	Female	12
12	C25	C25F5	Female	12
13	C27	C27F3	Female	10
13	C27	C27F3	Female	12
13	C27	C27F3	Female	12
13	C27	C27F3	Female	12
13	C27	C27F3	Female	12
13	C27	C27F3	Female	13
13	C27	C27F3	Female	13
13	C27	C27F3	Female	15
14	C25	C25F3	Female	9
14	C25	C25F3	Female	9
14	C25	C25F3	Female	10
14	C25	C25F3	Female	10
14	C25	C25F3	Female	10
14	C25	C25F3	Female	11
14	C25	C25F3	Female	12
14	C25	C25F3	Female	12
14	C25	C25F3	Female	13
14	C25	C25F3	Female	13
15	C27	C27F5	Female	10
15	C27	C27F5	Female	12
15	C27	C27F5	Female	12
15	C27	C27F5	Female	12
15	C27	C27F5	Female	14
15	C27	C27F5	Female	15
15	C27	C27F5	Female	15
15	C27	C27F5	Female	16
15	C27	C27F5	Female	13
16	Sham	ShamF5	Female	7
16	Sham	ShamF5	Female	8
16	Sham	ShamF5	Female	9
16	Sham	ShamF5	Female	9
16	Sham	ShamF5	Female	9
16	Sham	ShamF5	Female	10
16	Sham	ShamF5	Female	10
16	Sham	ShamF5	Female	12
16	Sham	ShamF5	Female	12
16	Sham	ShamF5	Female	12
17	C27	C27F2	Female	8
17	C27	C27F2	Female	9
17	C27	C27F2	Female	9
17	C27	C27F2	Female	11
17	C27	C27F2	Female	12
17	C27	C27F2	Female	12
17	C27	C27F2	Female	13
17	C27	C27F2	Female	13
17	C27	C27F2	Female	14
18	C25	C25F1	Female	6
18	C25	C25F1	Female	9
18	C25	C25F1	Female	11
18	C25	C25F1	Female	12
18	C25	C25F1	Female	12
18	C25	C25F1	Female	13
18	C25	C25F1	Female	13
18	C25	C25F1	Female	14
19	C29	C29F1	Female	9
19	C29	C29F1	Female	10
19	C29	C29F1	Female	11
19	C29	C29F1	Female	11
19	C29	C29F1	Female	11
19	C29	C29F1	Female	12
19	C29	C29F1	Female	12
19	C29	C29F1	Female	13
19	C29	C29F1	Female	14
19	C29	C29F1	Female	15
20	C23	C23F4	Female	9
20	C23	C23F4	Female	11
20	C23	C23F4	Female	11
20	C23	C23F4	Female	11
20	C23	C23F4	Female	11
20	C23	C23F4	Female	12
20	C23	C23F4	Female	12
20	C23	C23F4	Female	13
20	C23	C23F4	Female	13
21	C29	C29F2	Female	11
21	C29	C29F2	Female	11
21	C29	C29F2	Female	12
21	C29	C29F2	Female	12
21	C29	C29F2	Female	12
21	C29	C29F2	Female	14
21	C29	C29F2	Female	14
21	C29	C29F2	Female	15
22	C23	C23F1	Female	9
22	C23	C23F1	Female	9
22	C23	C23F1	Female	10
22	C23	C23F1	Female	10
22	C23	C23F1	Female	10
22	C23	C23F1	Female	11
22	C23	C23F1	Female	11
22	C23	C23F1	Female	12
22	C23	C23F1	Female	13
22	C23	C23F1	Female	13
23	Sham	ShamF4	Female	9
23	Sham	ShamF4	Female	10
23	Sham	ShamF4	Female	10
23	Sham	ShamF4	Female	10
23	Sham	ShamF4	Female	11
23	Sham	ShamF4	Female	11
23	Sham	ShamF4	Female	12
23	Sham	ShamF4	Female	12
23	Sham	ShamF4	Female	12
23	Sham	ShamF4	Female	12
24	Sham	ShamF1	Female	10
24	Sham	ShamF1	Female	10
24	Sham	ShamF1	Female	12
24	Sham	ShamF1	Female	12
24	Sham	ShamF1	Female	12
24	Sham	ShamF1	Female	12
24	Sham	ShamF1	Female	12
24	Sham	ShamF1	Female	12
24	Sham	ShamF1	Female	13
25	Sham	ShamF2	Female	10
25	Sham	ShamF2	Female	11
25	Sham	ShamF2	Female	12
25	Sham	ShamF2	Female	12
25	Sham	ShamF2	Female	12
25	Sham	ShamF2	Female	12
25	Sham	ShamF2	Female	12
25	Sham	ShamF2	Female	12
25	Sham	ShamF2	Female	13
26	C31	C31F2	Female	11
26	C31	C31F2	Female	11
26	C31	C31F2	Female	12
26	C31	C31F2	Female	12
26	C31	C31F2	Female	12
26	C31	C31F2	Female	12
26	C31	C31F2	Female	13
26	C31	C31F2	Female	15
26	C31	C31F2	Female	17
26	C31	C31F2	Female	18
27	C27	C27F4	Female	8
27	C27	C27F4	Female	9
27	C27	C27F4	Female	12
27	C27	C27F4	Female	12
27	C27	C27F4	Female	13
27	C27	C27F4	Female	13
27	C27	C27F4	Female	14
27	C27	C27F4	Female	14
27	C27	C27F4	Female	15
27	C27	C27F4	Female	16
28	C25	C25F2	Female	7
28	C25	C25F2	Female	8
28	C25	C25F2	Female	9
28	C25	C25F2	Female	10
28	C25	C25F2	Female	10
28	C25	C25F2	Female	10
28	C25	C25F2	Female	11
28	C25	C25F2	Female	12
28	C25	C25F2	Female	13
29	C23	C23F3	Female	9
29	C23	C23F3	Female	10
29	C23	C23F3	Female	11
29	C23	C23F3	Female	11
29	C23	C23F3	Female	12
29	C23	C23F3	Female	12
29	C23	C23F3	Female	14
29	C23	C23F3	Female	14
29	C23	C23F3	Female	14
29	C23	C23F3	Female	16
30	C25	C25F4	Female	7
30	C25	C25F4	Female	9
30	C25	C25F4	Female	9
30	C25	C25F4	Female	9
30	C25	C25F4	Female	10
30	C25	C25F4	Female	11
30	C25	C25F4	Female	11
30	C25	C25F4	Female	11
30	C25	C25F4	Female	12
30	C25	C25F4	Female	12
