# Supplementary material for: Desiccation resistance differences in Drosophila species can be largely explained by variations in cuticular hydrocarbons
Source: eLife. 2022 Dec 6;11:e80859. doi: 10.7554/eLife.80859 (PMC9757832; doi:10.7554/eLife.80859)
Supplement: Figure 5—source data 3. [file elife-80859-fig5-data3.xlsx]

## Sheet: Desiccation_coated_CHC-
Figure 5 - Source data 4: Desiccation resistance of Drosophila melanogaster CHC- flies when coated with individual CHC of 2MeC26, 2MeC28, 2MeC30, C23, C25, C27, C29, and C31
Obs	Trt	Lable	Sex	Desiccation
1	2MeC26	2MeC26F2	Female	2
1	2MeC26	2MeC26F2	Female	3
1	2MeC26	2MeC26F2	Female	3
1	2MeC26	2MeC26F2	Female	3
1	2MeC26	2MeC26F2	Female	4
1	2MeC26	2MeC26F2	Female	4
1	2MeC26	2MeC26F2	Female	4
1	2MeC26	2MeC26F2	Female	4
1	2MeC26	2MeC26F2	Female	5
1	2MeC26	2MeC26F2	Female	5
2	Sham	Control	Female	3
2	Sham	Control	Female	3
2	Sham	Control	Female	3
2	Sham	Control	Female	3
2	Sham	Control	Female	3
2	Sham	Control	Female	3
2	Sham	Control	Female	4
2	Sham	Control	Female	4
2	Sham	Control	Female	4
2	Sham	Control	Female	4
3	C29	C29F1	Female	3
3	C29	C29F1	Female	4
3	C29	C29F1	Female	4
3	C29	C29F1	Female	4
3	C29	C29F1	Female	5
3	C29	C29F1	Female	5
3	C29	C29F1	Female	5
3	C29	C29F1	Female	5
3	C29	C29F1	Female	5
4	2MeC28	2MeC28F2	Female	4
4	2MeC28	2MeC28F2	Female	4
4	2MeC28	2MeC28F2	Female	4
4	2MeC28	2MeC28F2	Female	4
4	2MeC28	2MeC28F2	Female	5
4	2MeC28	2MeC28F2	Female	5
4	2MeC28	2MeC28F2	Female	5
4	2MeC28	2MeC28F2	Female	5
4	2MeC28	2MeC28F2	Female	6
5	C27	C27F1	Female	4
5	C27	C27F1	Female	4
5	C27	C27F1	Female	5
5	C27	C27F1	Female	5
5	C27	C27F1	Female	5
5	C27	C27F1	Female	5
5	C27	C27F1	Female	5
5	C27	C27F1	Female	6
5	C27	C27F1	Female	7
6	C27	C27F2	Female	3
6	C27	C27F2	Female	3
6	C27	C27F2	Female	3
6	C27	C27F2	Female	4
6	C27	C27F2	Female	4
6	C27	C27F2	Female	4
6	C27	C27F2	Female	4
6	C27	C27F2	Female	5
6	C27	C27F2	Female	5
7	C31	C31F2	Female	4
7	C31	C31F2	Female	4
7	C31	C31F2	Female	4
7	C31	C31F2	Female	4
7	C31	C31F2	Female	4
7	C31	C31F2	Female	5
7	C31	C31F2	Female	5
7	C31	C31F2	Female	5
7	C31	C31F2	Female	6
7	C31	C31F2	Female	6
8	2MeC26	2MeC26F3	Female	4
8	2MeC26	2MeC26F3	Female	4
8	2MeC26	2MeC26F3	Female	4
8	2MeC26	2MeC26F3	Female	4
8	2MeC26	2MeC26F3	Female	4
8	2MeC26	2MeC26F3	Female	4
8	2MeC26	2MeC26F3	Female	5
8	2MeC26	2MeC26F3	Female	5
8	2MeC26	2MeC26F3	Female	5
8	2MeC26	2MeC26F3	Female	5
9	C31	C31F4	Female	4
9	C31	C31F4	Female	4
9	C31	C31F4	Female	4
9	C31	C31F4	Female	4
9	C31	C31F4	Female	4
9	C31	C31F4	Female	4
9	C31	C31F4	Female	5
9	C31	C31F4	Female	5
10	C29	C29F2	Female	4
10	C29	C29F2	Female	4
10	C29	C29F2	Female	4
10	C29	C29F2	Female	4
10	C29	C29F2	Female	5
10	C29	C29F2	Female	5
10	C29	C29F2	Female	5
10	C29	C29F2	Female	5
10	C29	C29F2	Female	5
10	C29	C29F2	Female	6
11	C25	C25F1	Female	4
11	C25	C25F1	Female	4
11	C25	C25F1	Female	4
11	C25	C25F1	Female	4
11	C25	C25F1	Female	4
11	C25	C25F1	Female	5
11	C25	C25F1	Female	5
11	C25	C25F1	Female	5
11	C25	C25F1	Female	6
12	2MeC30	2MeC30F3	Female	4
12	2MeC30	2MeC30F3	Female	5
12	2MeC30	2MeC30F3	Female	5
12	2MeC30	2MeC30F3	Female	5
12	2MeC30	2MeC30F3	Female	5
12	2MeC30	2MeC30F3	Female	5
12	2MeC30	2MeC30F3	Female	6
12	2MeC30	2MeC30F3	Female	6
12	2MeC30	2MeC30F3	Female	6
12	2MeC30	2MeC30F3	Female	7
13	C23	C23F3	Female	4
13	C23	C23F3	Female	4
13	C23	C23F3	Female	4
13	C23	C23F3	Female	4
13	C23	C23F3	Female	5
13	C23	C23F3	Female	5
13	C23	C23F3	Female	5
13	C23	C23F3	Female	5
13	C23	C23F3	Female	5
13	C23	C23F3	Female	6
14	C27	C27F3	Female	4
14	C27	C27F3	Female	4
14	C27	C27F3	Female	4
14	C27	C27F3	Female	4
14	C27	C27F3	Female	4
14	C27	C27F3	Female	4
14	C27	C27F3	Female	4
14	C27	C27F3	Female	5
14	C27	C27F3	Female	6
15	C23	C23F2	Female	3
15	C23	C23F2	Female	4
15	C23	C23F2	Female	4
15	C23	C23F2	Female	4
15	C23	C23F2	Female	4
15	C23	C23F2	Female	5
15	C23	C23F2	Female	5
15	C23	C23F2	Female	5
15	C23	C23F2	Female	5
15	C23	C23F2	Female	5
16	Sham	ShamF3	Female	3
16	Sham	ShamF3	Female	3
16	Sham	ShamF3	Female	3
16	Sham	ShamF3	Female	3
16	Sham	ShamF3	Female	3
16	Sham	ShamF3	Female	4
16	Sham	ShamF3	Female	4
16	Sham	ShamF3	Female	4
16	Sham	ShamF3	Female	4
16	Sham	ShamF3	Female	4
17	2MeC26	2MeC26F1	Female	4
17	2MeC26	2MeC26F1	Female	4
17	2MeC26	2MeC26F1	Female	4
17	2MeC26	2MeC26F1	Female	5
17	2MeC26	2MeC26F1	Female	5
17	2MeC26	2MeC26F1	Female	5
17	2MeC26	2MeC26F1	Female	6
17	2MeC26	2MeC26F1	Female	6
18	C29	C29F3	Female	3
18	C29	C29F3	Female	4
18	C29	C29F3	Female	4
18	C29	C29F3	Female	4
18	C29	C29F3	Female	5
18	C29	C29F3	Female	5
18	C29	C29F3	Female	6
18	C29	C29F3	Female	6
18	C29	C29F3	Female	6
18	C29	C29F3	Female	6
19	C29	C29F5	Female	4
19	C29	C29F5	Female	4
19	C29	C29F5	Female	4
19	C29	C29F5	Female	4
19	C29	C29F5	Female	4
19	C29	C29F5	Female	5
19	C29	C29F5	Female	5
19	C29	C29F5	Female	5
19	C29	C29F5	Female	5
20	C25	C25F5	Female	4
20	C25	C25F5	Female	4
20	C25	C25F5	Female	4
20	C25	C25F5	Female	4
20	C25	C25F5	Female	4
20	C25	C25F5	Female	4
20	C25	C25F5	Female	5
20	C25	C25F5	Female	5
20	C25	C25F5	Female	5
20	C25	C25F5	Female	6
21	C27	C27F5	Female	3
21	C27	C27F5	Female	3
21	C27	C27F5	Female	4
21	C27	C27F5	Female	4
21	C27	C27F5	Female	4
21	C27	C27F5	Female	4
21	C27	C27F5	Female	4
21	C27	C27F5	Female	5
21	C27	C27F5	Female	5
21	C27	C27F5	Female	5
22	C23	C23F5	Female	3
22	C23	C23F5	Female	4
22	C23	C23F5	Female	4
22	C23	C23F5	Female	4
22	C23	C23F5	Female	4
22	C23	C23F5	Female	5
22	C23	C23F5	Female	5
22	C23	C23F5	Female	5
22	C23	C23F5	Female	6
23	C25	C25F2	Female	3
23	C25	C25F2	Female	3
23	C25	C25F2	Female	4
23	C25	C25F2	Female	4
23	C25	C25F2	Female	4
23	C25	C25F2	Female	5
23	C25	C25F2	Female	5
23	C25	C25F2	Female	5
23	C25	C25F2	Female	5
24	C27	C25F3	Female	4
24	C27	C25F3	Female	4
24	C27	C25F3	Female	4
24	C27	C25F3	Female	4
24	C27	C25F3	Female	5
24	C27	C25F3	Female	5
24	C27	C25F3	Female	5
24	C27	C25F3	Female	6
24	C27	C25F3	Female	6
24	C27	C25F3	Female	6
25	C31	C31F1	Female	3
25	C31	C31F1	Female	4
25	C31	C31F1	Female	4
25	C31	C31F1	Female	4
25	C31	C31F1	Female	4
25	C31	C31F1	Female	4
25	C31	C31F1	Female	5
25	C31	C31F1	Female	5
26	C29	C29F4	Female	3
26	C29	C29F4	Female	4
26	C29	C29F4	Female	4
26	C29	C29F4	Female	4
26	C29	C29F4	Female	4
26	C29	C29F4	Female	5
26	C29	C29F4	Female	5
26	C29	C29F4	Female	6
26	C29	C29F4	Female	6
26	C29	C29F4	Female	6
27	C27	C27F4	Female	4
27	C27	C27F4	Female	4
27	C27	C27F4	Female	4
27	C27	C27F4	Female	5
27	C27	C27F4	Female	5
27	C27	C27F4	Female	5
27	C27	C27F4	Female	6
27	C27	C27F4	Female	6
27	C27	C27F4	Female	6
28	C23	C23F4	Female	3
28	C23	C23F4	Female	3
28	C23	C23F4	Female	4
28	C23	C23F4	Female	4
28	C23	C23F4	Female	4
28	C23	C23F4	Female	4
28	C23	C23F4	Female	4
28	C23	C23F4	Female	5
28	C23	C23F4	Female	5
29	Sham	ShamF2	Female	3
29	Sham	ShamF2	Female	3
29	Sham	ShamF2	Female	3
29	Sham	ShamF2	Female	3
29	Sham	ShamF2	Female	3
29	Sham	ShamF2	Female	4
29	Sham	ShamF2	Female	4
29	Sham	ShamF2	Female	4
29	Sham	ShamF2	Female	4
29	Sham	ShamF2	Female	4
30	2MeC28	2MeC28F4	Female	4
30	2MeC28	2MeC28F4	Female	4
30	2MeC28	2MeC28F4	Female	4
30	2MeC28	2MeC28F4	Female	4
30	2MeC28	2MeC28F4	Female	4
30	2MeC28	2MeC28F4	Female	4
30	2MeC28	2MeC28F4	Female	5
30	2MeC28	2MeC28F4	Female	5
30	2MeC28	2MeC28F4	Female	5
30	2MeC28	2MeC28F4	Female	5
31	C31	C31F3	Female	4
31	C31	C31F3	Female	4
31	C31	C31F3	Female	4
31	C31	C31F3	Female	4
31	C31	C31F3	Female	5
31	C31	C31F3	Female	5
31	C31	C31F3	Female	5
31	C31	C31F3	Female	5
31	C31	C31F3	Female	6
32	C25	C25F4	Female	4
32	C25	C25F4	Female	4
32	C25	C25F4	Female	4
32	C25	C25F4	Female	5
32	C25	C25F4	Female	5
32	C25	C25F4	Female	5
32	C25	C25F4	Female	5
32	C25	C25F4	Female	6
32	C25	C25F4	Female	6
33	2MeC28	2MeC28F3	Female	3
33	2MeC28	2MeC28F3	Female	4
33	2MeC28	2MeC28F3	Female	4
33	2MeC28	2MeC28F3	Female	4
33	2MeC28	2MeC28F3	Female	4
33	2MeC28	2MeC28F3	Female	4
33	2MeC28	2MeC28F3	Female	4
33	2MeC28	2MeC28F3	Female	5
33	2MeC28	2MeC28F3	Female	6
33	2MeC28	2MeC28F3	Female	6
34	2MeC28	2MeC28F5	Female	4
34	2MeC28	2MeC28F5	Female	4
34	2MeC28	2MeC28F5	Female	4
34	2MeC28	2MeC28F5	Female	4
34	2MeC28	2MeC28F5	Female	4
34	2MeC28	2MeC28F5	Female	5
34	2MeC28	2MeC28F5	Female	5
34	2MeC28	2MeC28F5	Female	5
34	2MeC28	2MeC28F5	Female	5
34	2MeC28	2MeC28F5	Female	5
35	2MeC30	2MeC30F2	Female	3
35	2MeC30	2MeC30F2	Female	4
35	2MeC30	2MeC30F2	Female	4
35	2MeC30	2MeC30F2	Female	4
35	2MeC30	2MeC30F2	Female	4
35	2MeC30	2MeC30F2	Female	5
35	2MeC30	2MeC30F2	Female	5
35	2MeC30	2MeC30F2	Female	5
35	2MeC30	2MeC30F2	Female	5
35	2MeC30	2MeC30F2	Female	5
36	2MeC30	2MeC30F1	Female	3
36	2MeC30	2MeC30F1	Female	4
36	2MeC30	2MeC30F1	Female	4
36	2MeC30	2MeC30F1	Female	4
36	2MeC30	2MeC30F1	Female	5
36	2MeC30	2MeC30F1	Female	5
36	2MeC30	2MeC30F1	Female	5
36	2MeC30	2MeC30F1	Female	6
36	2MeC30	2MeC30F1	Female	6
36	2MeC30	2MeC30F1	Female	6
37	Sham	ShamF5	Female	3
37	Sham	ShamF5	Female	3
37	Sham	ShamF5	Female	4
37	Sham	ShamF5	Female	4
37	Sham	ShamF5	Female	4
37	Sham	ShamF5	Female	4
37	Sham	ShamF5	Female	4
37	Sham	ShamF5	Female	4
38	2MeC28	2MeC28F1	Female	4
38	2MeC28	2MeC28F1	Female	4
38	2MeC28	2MeC28F1	Female	4
38	2MeC28	2MeC28F1	Female	4
38	2MeC28	2MeC28F1	Female	5
38	2MeC28	2MeC28F1	Female	5
38	2MeC28	2MeC28F1	Female	5
38	2MeC28	2MeC28F1	Female	6
38	2MeC28	2MeC28F1	Female	6
38	2MeC28	2MeC28F1	Female	6
39	2MeC26	2MeC26F4	Female	4
39	2MeC26	2MeC26F4	Female	4
39	2MeC26	2MeC26F4	Female	4
39	2MeC26	2MeC26F4	Female	5
39	2MeC26	2MeC26F4	Female	5
39	2MeC26	2MeC26F4	Female	5
39	2MeC26	2MeC26F4	Female	5
39	2MeC26	2MeC26F4	Female	5
39	2MeC26	2MeC26F4	Female	5
39	2MeC26	2MeC26F4	Female	6
40	2MeC30	2MeC30F5	Female	3
40	2MeC30	2MeC30F5	Female	4
40	2MeC30	2MeC30F5	Female	5
40	2MeC30	2MeC30F5	Female	5
40	2MeC30	2MeC30F5	Female	5
40	2MeC30	2MeC30F5	Female	6
40	2MeC30	2MeC30F5	Female	6
40	2MeC30	2MeC30F5	Female	7
40	2MeC30	2MeC30F5	Female	7
40	2MeC30	2MeC30F5	Female	7
41	2MeC26	2MeC26F5	Female	4
41	2MeC26	2MeC26F5	Female	4
41	2MeC26	2MeC26F5	Female	4
41	2MeC26	2MeC26F5	Female	5
41	2MeC26	2MeC26F5	Female	5
41	2MeC26	2MeC26F5	Female	5
41	2MeC26	2MeC26F5	Female	6
41	2MeC26	2MeC26F5	Female	6
41	2MeC26	2MeC26F5	Female	6
42	2MeC30	2MeC30F4	Female	4
42	2MeC30	2MeC30F4	Female	4
42	2MeC30	2MeC30F4	Female	5
42	2MeC30	2MeC30F4	Female	5
42	2MeC30	2MeC30F4	Female	5
42	2MeC30	2MeC30F4	Female	5
42	2MeC30	2MeC30F4	Female	6
42	2MeC30	2MeC30F4	Female	6
42	2MeC30	2MeC30F4	Female	7
42	2MeC30	2MeC30F4	Female	7
43	C31	C31F5	Female	4
43	C31	C31F5	Female	4
43	C31	C31F5	Female	4
43	C31	C31F5	Female	4
43	C31	C31F5	Female	4
43	C31	C31F5	Female	5
43	C31	C31F5	Female	5
43	C31	C31F5	Female	5
43	C31	C31F5	Female	6
44	C23	C23F1	Female	4
44	C23	C23F1	Female	4
44	C23	C23F1	Female	4
44	C23	C23F1	Female	4
44	C23	C23F1	Female	4
44	C23	C23F1	Female	4
44	C23	C23F1	Female	5
44	C23	C23F1	Female	5
44	C23	C23F1	Female	5
44	C23	C23F1	Female	5
45	Sham	ShamF1	Female	3
45	Sham	ShamF1	Female	3
45	Sham	ShamF1	Female	3
45	Sham	ShamF1	Female	4
45	Sham	ShamF1	Female	4
45	Sham	ShamF1	Female	4
45	Sham	ShamF1	Female	4
45	Sham	ShamF1	Female	4
45	Sham	ShamF1	Female	4
46	C29	C29M2	Male	2
46	C29	C29M2	Male	2
46	C29	C29M2	Male	2
46	C29	C29M2	Male	2
46	C29	C29M2	Male	2
46	C29	C29M2	Male	2
46	C29	C29M2	Male	2
46	C29	C29M2	Male	2
46	C29	C29M2	Male	3
46	C29	C29M2	Male	3
47	2MeC30	2MeC30M1	Male	2
47	2MeC30	2MeC30M1	Male	2
47	2MeC30	2MeC30M1	Male	2
47	2MeC30	2MeC30M1	Male	2
47	2MeC30	2MeC30M1	Male	2
47	2MeC30	2MeC30M1	Male	3
47	2MeC30	2MeC30M1	Male	3
47	2MeC30	2MeC30M1	Male	3
47	2MeC30	2MeC30M1	Male	4
47	2MeC30	2MeC30M1	Male	4
48	C27	C27M1	Male	2
48	C27	C27M1	Male	2
48	C27	C27M1	Male	2
48	C27	C27M1	Male	2
48	C27	C27M1	Male	2
48	C27	C27M1	Male	3
48	C27	C27M1	Male	3
48	C27	C27M1	Male	3
48	C27	C27M1	Male	3
48	C27	C27M1	Male	3
48	C27	C27M1	Male	3
49	C31	C31M1	Male	2
49	C31	C31M1	Male	2
49	C31	C31M1	Male	2
49	C31	C31M1	Male	2
49	C31	C31M1	Male	2
49	C31	C31M1	Male	2
49	C31	C31M1	Male	2
49	C31	C31M1	Male	2
49	C31	C31M1	Male	2
49	C31	C31M1	Male	4
50	Sham	ShamM2	Male	2
50	Sham	ShamM2	Male	2
50	Sham	ShamM2	Male	2
50	Sham	ShamM2	Male	2
50	Sham	ShamM2	Male	2
50	Sham	ShamM2	Male	2
50	Sham	ShamM2	Male	3
50	Sham	ShamM2	Male	3
50	Sham	ShamM2	Male	3
50	Sham	ShamM2	Male	3
51	2MeC28	2MeC28M1	Male	2
51	2MeC28	2MeC28M1	Male	3
51	2MeC28	2MeC28M1	Male	3
51	2MeC28	2MeC28M1	Male	3
51	2MeC28	2MeC28M1	Male	3
51	2MeC28	2MeC28M1	Male	3
51	2MeC28	2MeC28M1	Male	3
51	2MeC28	2MeC28M1	Male	4
52	C25	C25M2	Male	2
52	C25	C25M2	Male	2
52	C25	C25M2	Male	2
52	C25	C25M2	Male	3
52	C25	C25M2	Male	3
52	C25	C25M2	Male	3
52	C25	C25M2	Male	3
52	C25	C25M2	Male	3
52	C25	C25M2	Male	3
52	C25	C25M2	Male	4
53	C25	C25M3	Male	2
53	C25	C25M3	Male	2
53	C25	C25M3	Male	2
53	C25	C25M3	Male	2
53	C25	C25M3	Male	2
53	C25	C25M3	Male	2
53	C25	C25M3	Male	2
53	C25	C25M3	Male	2
53	C25	C25M3	Male	3
53	C25	C25M3	Male	3
54	Sham	ShamM3	Male	2
54	Sham	ShamM3	Male	2
54	Sham	ShamM3	Male	2
54	Sham	ShamM3	Male	2
54	Sham	ShamM3	Male	2
54	Sham	ShamM3	Male	2
54	Sham	ShamM3	Male	2
54	Sham	ShamM3	Male	2
54	Sham	ShamM3	Male	2
54	Sham	ShamM3	Male	2
55	C29	C29M1	Male	2
55	C29	C29M1	Male	2
55	C29	C29M1	Male	2
55	C29	C29M1	Male	2
55	C29	C29M1	Male	2
55	C29	C29M1	Male	3
55	C29	C29M1	Male	3
55	C29	C29M1	Male	3
55	C29	C29M1	Male	4
56	2MeC26	2MeC26M2	Male	2
56	2MeC26	2MeC26M2	Male	2
56	2MeC26	2MeC26M2	Male	3
56	2MeC26	2MeC26M2	Male	3
56	2MeC26	2MeC26M2	Male	3
56	2MeC26	2MeC26M2	Male	3
56	2MeC26	2MeC26M2	Male	3
56	2MeC26	2MeC26M2	Male	3
56	2MeC26	2MeC26M2	Male	3
57	C27	C27M2	Male	2
57	C27	C27M2	Male	2
57	C27	C27M2	Male	2
57	C27	C27M2	Male	2
57	C27	C27M2	Male	2
57	C27	C27M2	Male	2
57	C27	C27M2	Male	3
57	C27	C27M2	Male	3
57	C27	C27M2	Male	3
57	C27	C27M2	Male	3
58	C23	C23M3	Male	2
58	C23	C23M3	Male	2
58	C23	C23M3	Male	2
58	C23	C23M3	Male	2
58	C23	C23M3	Male	3
58	C23	C23M3	Male	3
58	C23	C23M3	Male	3
58	C23	C23M3	Male	3
58	C23	C23M3	Male	4
58	C23	C23M3	Male	4
59	C31	C31M2	Male	2
59	C31	C31M2	Male	2
59	C31	C31M2	Male	2
59	C31	C31M2	Male	2
59	C31	C31M2	Male	2
59	C31	C31M2	Male	3
59	C31	C31M2	Male	3
59	C31	C31M2	Male	3
59	C31	C31M2	Male	3
60	C23	C23M1	Male	2
60	C23	C23M1	Male	2
60	C23	C23M1	Male	2
60	C23	C23M1	Male	2
60	C23	C23M1	Male	3
60	C23	C23M1	Male	3
60	C23	C23M1	Male	3
60	C23	C23M1	Male	3
60	C23	C23M1	Male	3
61	2MeC30	2MeC30M2	Male	2
61	2MeC30	2MeC30M2	Male	2
61	2MeC30	2MeC30M2	Male	2
61	2MeC30	2MeC30M2	Male	2
61	2MeC30	2MeC30M2	Male	3
61	2MeC30	2MeC30M2	Male	3
61	2MeC30	2MeC30M2	Male	3
61	2MeC30	2MeC30M2	Male	3
61	2MeC30	2MeC30M2	Male	4
61	2MeC30	2MeC30M2	Male	4
62	2MeC28	2MeC28M2	Male	2
62	2MeC28	2MeC28M2	Male	2
62	2MeC28	2MeC28M2	Male	2
62	2MeC28	2MeC28M2	Male	2
62	2MeC28	2MeC28M2	Male	3
62	2MeC28	2MeC28M2	Male	3
62	2MeC28	2MeC28M2	Male	3
62	2MeC28	2MeC28M2	Male	4
63	C23	C23M2	Male	2
63	C23	C23M2	Male	2
63	C23	C23M2	Male	2
63	C23	C23M2	Male	2
63	C23	C23M2	Male	3
63	C23	C23M2	Male	3
63	C23	C23M2	Male	3
63	C23	C23M2	Male	3
63	C23	C23M2	Male	3
63	C23	C23M2	Male	3
64	Sham	ShamM1	Male	2
64	Sham	ShamM1	Male	2
64	Sham	ShamM1	Male	2
64	Sham	ShamM1	Male	2
64	Sham	ShamM1	Male	2
64	Sham	ShamM1	Male	2
64	Sham	ShamM1	Male	2
64	Sham	ShamM1	Male	2
64	Sham	ShamM1	Male	3
65	2MeC26	2MeC26M1	Male	2
65	2MeC26	2MeC26M1	Male	2
65	2MeC26	2MeC26M1	Male	2
65	2MeC26	2MeC26M1	Male	3
65	2MeC26	2MeC26M1	Male	3
65	2MeC26	2MeC26M1	Male	3
65	2MeC26	2MeC26M1	Male	4
65	2MeC26	2MeC26M1	Male	4
66	C25	C25M1	Male	2
66	C25	C25M1	Male	2
66	C25	C25M1	Male	3
66	C25	C25M1	Male	3
66	C25	C25M1	Male	3
66	C25	C25M1	Male	3
66	C25	C25M1	Male	3
66	C25	C25M1	Male	4
67	C27	C27M4	Male	2
67	C27	C27M4	Male	2
67	C27	C27M4	Male	2
67	C27	C27M4	Male	2
67	C27	C27M4	Male	2
67	C27	C27M4	Male	2
67	C27	C27M4	Male	2
67	C27	C27M4	Male	2
67	C27	C27M4	Male	3
67	C27	C27M4	Male	4
68	C31	C31M3	Male	2
68	C31	C31M3	Male	2
68	C31	C31M3	Male	2
68	C31	C31M3	Male	3
68	C31	C31M3	Male	3
68	C31	C31M3	Male	3
68	C31	C31M3	Male	3
68	C31	C31M3	Male	4
68	C31	C31M3	Male	4
69	2MeC30	2MeC30M4	Male	2
69	2MeC30	2MeC30M4	Male	2
69	2MeC30	2MeC30M4	Male	2
69	2MeC30	2MeC30M4	Male	3
69	2MeC30	2MeC30M4	Male	3
69	2MeC30	2MeC30M4	Male	3
69	2MeC30	2MeC30M4	Male	3
69	2MeC30	2MeC30M4	Male	3
69	2MeC30	2MeC30M4	Male	3
69	2MeC30	2MeC30M4	Male	4
70	2MeC28	2MeC28M4	Male	2
70	2MeC28	2MeC28M4	Male	2
70	2MeC28	2MeC28M4	Male	3
70	2MeC28	2MeC28M4	Male	3
70	2MeC28	2MeC28M4	Male	3
70	2MeC28	2MeC28M4	Male	4
70	2MeC28	2MeC28M4	Male	4
70	2MeC28	2MeC28M4	Male	4
71	2MeC26	2MeC26M4	Male	2
71	2MeC26	2MeC26M4	Male	2
71	2MeC26	2MeC26M4	Male	2
71	2MeC26	2MeC26M4	Male	3
71	2MeC26	2MeC26M4	Male	3
71	2MeC26	2MeC26M4	Male	4
71	2MeC26	2MeC26M4	Male	4
71	2MeC26	2MeC26M4	Male	4
71	2MeC26	2MeC26M4	Male	4
72	2MeC28	2MeC28M5	Male	2
72	2MeC28	2MeC28M5	Male	2
72	2MeC28	2MeC28M5	Male	3
72	2MeC28	2MeC28M5	Male	3
72	2MeC28	2MeC28M5	Male	3
72	2MeC28	2MeC28M5	Male	4
72	2MeC28	2MeC28M5	Male	4
72	2MeC28	2MeC28M5	Male	4
72	2MeC28	2MeC28M5	Male	4
73	C23	C23M4	Male	2
73	C23	C23M4	Male	2
73	C23	C23M4	Male	2
73	C23	C23M4	Male	2
73	C23	C23M4	Male	3
73	C23	C23M4	Male	3
73	C23	C23M4	Male	3
73	C23	C23M4	Male	3
73	C23	C23M4	Male	5
74	C25	C25M5	Male	2
74	C25	C25M5	Male	2
74	C25	C25M5	Male	2
74	C25	C25M5	Male	2
74	C25	C25M5	Male	2
74	C25	C25M5	Male	2
74	C25	C25M5	Male	2
74	C25	C25M5	Male	3
74	C25	C25M5	Male	3
75	C29	C29M3	Male	2
75	C29	C29M3	Male	2
75	C29	C29M3	Male	2
75	C29	C29M3	Male	2
75	C29	C29M3	Male	3
75	C29	C29M3	Male	3
75	C29	C29M3	Male	3
76	C25	C25M4	Male	2
76	C25	C25M4	Male	2
76	C25	C25M4	Male	2
76	C25	C25M4	Male	2
76	C25	C25M4	Male	3
76	C25	C25M4	Male	3
76	C25	C25M4	Male	3
76	C25	C25M4	Male	3
76	C25	C25M4	Male	3
76	C25	C25M4	Male	3
77	C29	C29M4	Male	2
77	C29	C29M4	Male	2
77	C29	C29M4	Male	2
77	C29	C29M4	Male	2
77	C29	C29M4	Male	2
77	C29	C29M4	Male	2
77	C29	C29M4	Male	3
77	C29	C29M4	Male	3
77	C29	C29M4	Male	5
78	C31	C31M4	Male	2
78	C31	C31M4	Male	2
78	C31	C31M4	Male	2
78	C31	C31M4	Male	2
78	C31	C31M4	Male	3
78	C31	C31M4	Male	3
78	C31	C31M4	Male	3
78	C31	C31M4	Male	3
78	C31	C31M4	Male	5
79	2MeC28	2MeC28M3	Male	2
79	2MeC28	2MeC28M3	Male	2
79	2MeC28	2MeC28M3	Male	3
79	2MeC28	2MeC28M3	Male	3
79	2MeC28	2MeC28M3	Male	3
79	2MeC28	2MeC28M3	Male	4
79	2MeC28	2MeC28M3	Male	4
79	2MeC28	2MeC28M3	Male	4
79	2MeC28	2MeC28M3	Male	5
80	2MeC30	2MeC30M3	Male	2
80	2MeC30	2MeC30M3	Male	2
80	2MeC30	2MeC30M3	Male	2
80	2MeC30	2MeC30M3	Male	3
80	2MeC30	2MeC30M3	Male	3
80	2MeC30	2MeC30M3	Male	3
80	2MeC30	2MeC30M3	Male	4
80	2MeC30	2MeC30M3	Male	4
80	2MeC30	2MeC30M3	Male	4
80	2MeC30	2MeC30M3	Male	5
81	Sham	ShamM4	Male	2
81	Sham	ShamM4	Male	2
81	Sham	ShamM4	Male	2
81	Sham	ShamM4	Male	2
81	Sham	ShamM4	Male	2
81	Sham	ShamM4	Male	2
81	Sham	ShamM4	Male	2
81	Sham	ShamM4	Male	2
81	Sham	ShamM4	Male	2
81	Sham	ShamM4	Male	3
82	C27	C27M5	Male	2
82	C27	C27M5	Male	2
82	C27	C27M5	Male	2
82	C27	C27M5	Male	2
82	C27	C27M5	Male	2
82	C27	C27M5	Male	3
82	C27	C27M5	Male	3
82	C27	C27M5	Male	3
82	C27	C27M5	Male	3
82	C27	C27M5	Male	3
83	2MeC30	2MeC30M5	Male	2
83	2MeC30	2MeC30M5	Male	2
83	2MeC30	2MeC30M5	Male	2
83	2MeC30	2MeC30M5	Male	2
83	2MeC30	2MeC30M5	Male	3
83	2MeC30	2MeC30M5	Male	3
83	2MeC30	2MeC30M5	Male	3
83	2MeC30	2MeC30M5	Male	3
83	2MeC30	2MeC30M5	Male	4
83	2MeC30	2MeC30M5	Male	4
84	2MeC26	2MeC26M3	Male	2
84	2MeC26	2MeC26M3	Male	2
84	2MeC26	2MeC26M3	Male	2
84	2MeC26	2MeC26M3	Male	3
84	2MeC26	2MeC26M3	Male	3
84	2MeC26	2MeC26M3	Male	3
84	2MeC26	2MeC26M3	Male	3
84	2MeC26	2MeC26M3	Male	3
85	C27	C27M3	Male	2
85	C27	C27M3	Male	2
85	C27	C27M3	Male	2
85	C27	C27M3	Male	3
85	C27	C27M3	Male	3
85	C27	C27M3	Male	3
85	C27	C27M3	Male	3
85	C27	C27M3	Male	3
86	2MeC26	2MeC26M5	Male	2
86	2MeC26	2MeC26M5	Male	2
86	2MeC26	2MeC26M5	Male	3
86	2MeC26	2MeC26M5	Male	3
86	2MeC26	2MeC26M5	Male	3
86	2MeC26	2MeC26M5	Male	3
86	2MeC26	2MeC26M5	Male	3
87	C23	C23M5	Male	2
87	C23	C23M5	Male	2
87	C23	C23M5	Male	2
87	C23	C23M5	Male	2
87	C23	C23M5	Male	2
87	C23	C23M5	Male	2
87	C23	C23M5	Male	2
87	C23	C23M5	Male	2
87	C23	C23M5	Male	2
87	C23	C23M5	Male	3
88	C31	C31M5	Male	2
88	C31	C31M5	Male	2
88	C31	C31M5	Male	2
88	C31	C31M5	Male	2
88	C31	C31M5	Male	2
88	C31	C31M5	Male	2
88	C31	C31M5	Male	3
88	C31	C31M5	Male	3
88	C31	C31M5	Male	5
88	C31	C31M5	Male	5
89	Sham	ShamM5	Male	2
89	Sham	ShamM5	Male	2
89	Sham	ShamM5	Male	2
89	Sham	ShamM5	Male	2
89	Sham	ShamM5	Male	2
89	Sham	ShamM5	Male	2
89	Sham	ShamM5	Male	2
89	Sham	ShamM5	Male	2
89	Sham	ShamM5	Male	2
89	Sham	ShamM5	Male	2
90	C29	C29M5	Male	2
90	C29	C29M5	Male	2
90	C29	C29M5	Male	2
90	C29	C29M5	Male	3
90	C29	C29M5	Male	3
90	C29	C29M5	Male	3
90	C29	C29M5	Male	3
90	C29	C29M5	Male	4
90	C29	C29M5	Male	5
