# Supplementary material for: Desiccation resistance differences in Drosophila species can be largely explained by variations in cuticular hydrocarbons
Source: eLife. 2022 Dec 6;11:e80859. doi: 10.7554/eLife.80859 (PMC9757832; doi:10.7554/eLife.80859)
Supplement: Figure 6—source data 1. [file elife-80859-fig6-data1.xlsx]

## Sheet: mbCHCdataLongestSummary
		Figure 6 - source data 1: Normalized quantities of mbCHCs, the length and normalized quantities of the longest mbCHC in each species
Species	Sex	Desiccation (h)	mb24	mb26	mb28	mb30	mb32	mbLongestLength	mbLongestQuantity
C.procnemis	Female	31.772	0	0.000920605	0.00789752	0.000908057	0	30	0.000908057
C.procnemis	Male	32.88	0	0.00146776	0.00953137	0.000910053	0	30	0.000910053
D.affinis	Female	20.42	0	0.00165542	0.00955047	0.00245453	0	30	0.00245453
D.affinis	Male	17.98	0	0.00374029	0.0134615	0.0023444	0	30	0.0023444
D.albomicans	Female	10.934	0	0	0.0104437	0.0137172	0	30	0.0137172
D.albomicans	Male	7.956	0	0	0.0106986	0.0252686	0	30	0.0252686
D.americana	Female	23.1183	0	0.00109476	0.0139094	0.0127424	0	30	0.0127424
D.americana	Male	23.35	0	0.0020956	0.0206182	0.012553	0	30	0.012553
D.ananassae	Female	8.502	0	0	0.00632305	0.01938	0	30	0.01938
D.ananassae	Male	5.244	0	0	0.00674922	0.019493	0	30	0.019493
D.arizonae	Female	34.132	0	0	0.00129215	0.0238454	0.00193986	32	0.00193986
D.arizonae	Male	31.662	0	0	0.00152166	0.0262632	0.00220558	32	0.00220558
D.azteca	Female	21.088	0	0.00266038	0.0273399	0.00472444	0	30	0.00472444
D.azteca	Male	20.36	0	0.00260503	0.0287591	0.00332038	0	30	0.00332038
D.biarmipes	Female	9.635	0.00523746	0.00169439	0.00194081	0	0	28	0.00194081
D.biarmipes	Male	4.86667	0.0111028	0.00225397	0.001563	0	0	28	0.001563
D.bipectinata	Female	5.335	0	0	0	0.0251689	0	30	0.0251689
D.bipectinata	Male	4.30333	0	0	0.00150372	0.0419142	0	30	0.0419142
D.borealis	Female	16.328	0	0.00165581	0.016431	0.00817329	0	30	0.00817329
D.borealis	Male	17.78	0	0.00185951	0.0199279	0.0103886	0	30	0.0103886
D.buzzatii	Female	30.15	0	0	0.00250281	0.010005	0.000423389	32	0.000423389
D.buzzatii	Male	35.8217	0	0	0.00341623	0.0108668	0.000386876	32	0.000386876
D.elegans	Female	9.985	0	0	0.00166518	0	0	28	0.00166518
D.elegans	Male	9.42333	0	0.000803265	0.00181831	0	0	28	0.00181831
D.equinoxialis	Female	7.72	0	0	0.000219797	0.00849162	0	30	0.00849162
D.equinoxialis	Male	7.086	0	0	0	0.0161507	0	30	0.0161507
D.erecta	Female	7.116	0	0.00175391	0.0130408	0.00347446	0	30	0.00347446
D.erecta	Male	3.122	0.00369804	0.0112308	0.0014831	0	0	28	0.0014831
D.ficusphila	Female	12.195	0	0	0.000466663	0	0	28	0.000466663
D.ficusphila	Male	12.1217	0	0	0.000495402	0	0	28	0.000495402
D.flavomontana	Female	21.92	0	0.00248671	0.0217565	0.0134428	0.000801523	32	0.000801523
D.flavomontana	Male	19.474	0	0.0038301	0.0269002	0.0135974	0.000937399	32	0.000937399
D.gunungcola	Female	12.484	0	0.00063624	0.00455104	0	0	28	0.00455104
D.gunungcola	Male	9.884	0	0.00202795	0.0042612	0	0	28	0.0042612
D.immigrans	Female	15.832	0	0	0.00956784	0.00979374	0.000887944	32	0.000887944
D.immigrans	Male	12.44	0	0	0.0108743	0.0147652	0.00168981	32	0.00168981
D.kikkawai	Female	6.83333	0	0	0.00385124	0	0	28	0.00385124
D.kikkawai	Male	4.62667	0	0	0.00409408	0	0	28	0.00409408
D.lacicola	Female	23.38	0	0.00162206	0.0204326	0.00863983	0.00146808	32	0.00146808
D.lacicola	Male	18.94	0	0.00250998	0.0250511	0.0069067	0.00230972	32	0.00230972
D.littoralis	Female	21.3	0	0.00149631	0.0156249	0.00657725	0.000503252	32	0.000503252
D.littoralis	Male	19.346	0	0.00196488	0.0173524	0.00570392	0	30	0.00570392
D.lummei	Female	23.1567	0	0.0012281	0.00988043	0.0052308	0	30	0.0052308
D.lummei	Male	20.0583	0	0.00149476	0.0119158	0.00505184	0	30	0.00505184
D.mauritiana	Female	4.40333	0	0.0030744	0.01355	0	0	28	0.01355
D.mauritiana	Male	2.75167	0.00562266	0.0165695	0.0183851	0	0	28	0.0183851
D.melanogaster	Female	8.44167	0.00074191	0.00788192	0.00432867	0	0	28	0.00432867
D.melanogaster	Male	5.29333	0.00262482	0.00553489	0.00267449	0	0	28	0.00267449
D.mercatorum	Female	19.368	0	0	0.0134322	0.0174187	0.000635189	32	0.000635189
D.mercatorum	Male	22.344	0	0	0.0238994	0.013175	0	30	0.013175
D.mojavensis	Female	42.4683	0	0	0.0014344	0.0117159	0.00127055	32	0.00127055
D.mojavensis	Male	58.2467	0	0	0.00173897	0.0140377	0.00146088	32	0.00146088
D.mulleri	Female	42.716	0	0	0.000692635	0.0200665	0.000884389	32	0.000884389
D.mulleri	Male	43.3	0	0	0.000788439	0.0198251	0.0012067	32	0.0012067
D.nasuta	Female	7.294	0	0	0.00392064	0.0139626	0.000810758	32	0.000810758
D.nasuta	Male	6.886	0	0	0.00397916	0.0188747	0.000933733	32	0.000933733
D.nebulosa	Female	10.9467	0	0	0.000541245	0.00935208	0	30	0.00935208
D.nebulosa	Male	8.86833	0	0	0.00145874	0.017047	0	30	0.017047
D.novamexicana	Female	24.0267	0	0.00167656	0.00976096	0.00801548	0	30	0.00801548
D.novamexicana	Male	26.935	0	0.00252366	0.0126423	0.00699493	0	30	0.00699493
D.paulistorum	Female	5.405	0	0	0	0.0069648	0	30	0.0069648
D.paulistorum	Male	6.59833	0	0	0	0.0130903	0	30	0.0130903
D.persimilis	Female	19.88	0.00112881	0.00442554	0.0216615	0.00159419	0	30	0.00159419
D.persimilis	Male	24.982	0.00106777	0.0044192	0.0230548	0.00178612	0	30	0.00178612
D.prosaltans	Female	15.944	0	0	0.00307078	0.0330343	0	30	0.0330343
D.prosaltans	Male	14.456	0	0	0.0026302	0.034276	0	30	0.034276
D.pseudoananassae	Female	6.61667	0	0	0	0.00704295	0	30	0.00704295
D.pseudoananassae	Male	6.7	0	0	0	0.0126914	0	30	0.0126914
D.pseudoobscura	Female	23.45	0	0.00333513	0.024001	0.00407398	0	30	0.00407398
D.pseudoobscura	Male	24.8233	0	0.00540685	0.0304326	0.00436907	0	30	0.00436907
D.repleta	Female	15.4167	0	0	0.00806661	0.0155743	0.000495319	32	0.000495319
D.repleta	Male	16.355	0	7.38e-05	0.0163498	0.0114431	0.000139481	30	0.0114431
D.saltans	Female	19.76	0	0	0.00151188	0.0232947	0	30	0.0232947
D.saltans	Male	18.74	0	0	0.00141702	0.0255193	0	30	0.0255193
D.serrata	Female	25.91	0	0.00107806	0.017705	0.00622978	0	30	0.00622978
D.serrata	Male	16.084	0	0.00267192	0.0238326	0.00408508	0	30	0.00408508
D.simulans	Female	11.25	0.000248112	0.00621665	0.00321978	0	0	28	0.00321978
D.simulans	Male	4.595	0.000526552	0.0159101	0.00225497	0	0	28	0.00225497
D.sturtevanti	Female	10	0	0	0.000525035	0.0188833	0.000811637	32	0.000811637
D.sturtevanti	Male	10.6	0	0	4.65e-05	0.0180584	0.00121167	32	0.00121167
D.sulfrigaster	Female	8.968	0	0	0.00105772	0.0136623	0.000673301	32	0.000673301
D.sulfrigaster	Male	8.64	0	0	0.00144095	0.0169317	0.000828083	32	0.000828083
D.suzukii	Female	9.205	0	0	0.00061932	0	0	28	0.00061932
D.suzukii	Male	8.41333	0	0	0.000547197	0	0	28	0.000547197
D.teissieri	Female	6.98	0	0.00745298	0.00444433	0	0	28	0.00444433
D.teissieri	Male	5.21667	0	0.0162562	0.00129185	0	0	28	0.00261018
D.virilis	Female	18.5	0	0.00322391	0.0317849	0.0183311	0	30	0.0183311
D.virilis	Male	14.342	0	0.00234232	0.0247784	0.0128602	0	30	0.0128602
D.willistoni	Female	9.7	0	0	0.00239181	0.0166351	0	30	0.0166351
D.willistoni	Male	8.78	0	0	0.00912031	0.02681	0	30	0.02681
D.yakuba	Female	7.945	0	0.0036581	0.00425068	0	0	28	0.00425068
D.yakuba	Male	3.92833	0	0.0135445	0.00132267	0	0	28	0.00642129
S.latifasciaeformis	Female	15.414	0	0	0.00153488	0.00520261	0	30	0.00520261
S.latifasciaeformis	Male	11.78	0	0	0.00374912	0.00290998	0	30	0.00290998
S.lebanonensis	Female	32.62	0	0.00233368	0.0154862	0.00376922	0	30	0.00376922
S.lebanonensis	Male	33.706	0	0.00135308	0.0257648	0.00489693	0	30	0.00489693
S.rufifrons	Female	51.844	0	0.000502984	0.0135828	0.00145709	0	30	0.00145709
S.rufifrons	Male	51.864	0	0.000596907	0.0123793	0.00081812	0	30	0.00081812
