# Supplementary material for: Desiccation resistance differences in Drosophila species can be largely explained by variations in cuticular hydrocarbons
Source: eLife. 2022 Dec 6;11:e80859. doi: 10.7554/eLife.80859 (PMC9757832; doi:10.7554/eLife.80859)
Supplement: Source data 1. [file elife-80859-data1.xlsx]

## Sheet: FinalCHC&Desiccation50Spp
Figure 2-5 - Source Data 1: Data of normalized CHC quantities, body weight, averaged desiccation resistance, total CHC quantity, and percentage of CHC quantities per body weight
Body weight (mg)	SpeciesW	SpeciesD	Desiccation (h)	Sex	Cohort	alkane21	alkane22	alkane23	alkane24	alkane25	alkane27	alkane29	mb24	mb26	mb28	mb30	mb32	monoene20	monoene21	monoene22	monoene23	monoene24	monoene25	monoene26	monoene27	monoene28	monoene29	monoene31	monoene32	monoene33	monoene34	monoene35	monoene36	monoene37	diene23	diene24	diene25	diene26	diene27	diene28	diene29	diene31	diene33	diene34	diene35	diene36	diene37	diene38	diene39
1.07	C.procnemis	Cpro	26.8	Female	1	0	0	0	0	0	0	0	0	0.0011028	0.00839251	0.000862047	0	0	0	0	0	0	0	0	0	0	0	0	0	0	0	0	0	0	0	0	0	0	0	0	0.0864493	0.00137654	0	0	0	0	0	0	0
1.16	C.procnemis	Cpro	35.9	Female	2	0	0	0	0	0	0	0	0	0.000931034	0.00654716	0.000609626	0	0	0	0	0	0	0	0	0	0	0	0	0	0	0	0	0	0	0	0	0	0	0	0	0.0647327	0.00105082	0	0	0	0	0	0	0
1.09	C.procnemis	Cpro	23.88	Female	3	0	0	0	0	0	0	0	0	0.000743119	0.00667777	0.000916749	0	0	0	0	0	0	0	0	0	0	0	0	0	0	0	0	0	0	0	0	0	0	0	0	0.0548048	0.000931921	0	0	0	0	0	0	0
1.01	C.procnemis	Cpro	36.78	Female	4	0	0	0	0	0	0	0	0	0.000970297	0.00706233	0.000806711	0	0	0	0	0	0	0	0	0	0	0	0	0	0	0	0	0	0	0	0	0	0	0	0	0.0789379	0.00119012	0	0	0	0	0	0	0
1.04	C.procnemis	Cpro	35.5	Female	5	0	0	0	0	0	0	0	0	0.000855769	0.0108079	0.00134515	0	0	0	0	0	0	0	0	0	0	0	0	0	0	0	0	0	0	0	0	0	0	0	0	0.1005	0.00174183	0	0	0	0	0	0	0
1.02	C.procnemis	Cpro	33.1	Male	1	0	0	0	0	0	0	0	0	0.00122549	0.00659995	0.000768659	0	0	0	0	0	0	0	0	0	0	0	0	0	0	0	0	0	0	0	0	0	0	0	0	0.0668383	0.00107887	0	0	0	0	0	0	0
0.94	C.procnemis	Cpro	33.5	Male	2	0	0	0	0	0	0	0	0	0.00169149	0.0100832	0.000834076	0	0	0	0	0	0	0	0	0	0	0	0	0	0	0	0	0	0	0	0	0	0	0	0	0.10706	0.00178304	0	0	0	0	0	0	0
0.92	C.procnemis	Cpro	36.2	Male	3	0	0	0	0	0	0	0	0	0.00179348	0.0114383	0.00115299	0	0	0	0	0	0	0	0	0	0	0	0	0	0	0	0	0	0	0	0	0	0	0	0	0.104571	0.00172979	0	0	0	0	0	0	0
0.97	C.procnemis	Cpro	28.6	Male	4	0	0	0	0	0	0	0	0	0.00127835	0.00876915	0.000887523	0	0	0	0	0	0	0	0	0	0	0	0	0	0	0	0	0	0	0	0	0	0	0	0	0.0952484	0.00141373	0	0	0	0	0	0	0
1	C.procnemis	Cpro	33	Male	5	0	0	0	0	0	0	0	0	0.00135	0.0107663	0.000907017	0	0	0	0	0	0	0	0	0	0	0	0	0	0	0	0	0	0	0	0	0	0	0	0	0.109939	0.00152369	0	0	0	0	0	0	0
1.27	D.affinis	Daff	14.7	Female	1	0	0	0	0	0	0	0	0	0.00210236	0.00971166	0.0024936	0	0	0	0	0.0121485	0	0.0175039	0	0.011601	0	0.0125857	0	0	0	0	0	0	0	0	0	0.00311703	0	0	0	0	0.00234619	0	0	0	0	0	0	0
1.37	D.affinis	Daff	21.8	Female	2	0	0	0	0	0	0	0	0	0.00145985	0.00893182	0.00191884	0	0	0	0	0.0131719	0	0.0154856	0	0.00941097	0	0.00420615	0	0	0	0	0	0	0	0	0	0.00249278	0	0	0	0	0.00123576	0	0	0	0	0	0	0
1.28	D.affinis	Daff	24	Female	3	0	0	0	0	0	0	0	0	0.00133594	0.00861999	0.00259422	0	0	0	0	0.0130646	0	0.0103467	0	0.00773987	0	0.00995777	0	0	0	0	0	0	0	0	0	0.0018825	0	0	0	0	0.00242045	0	0	0	0	0	0	0
1.26	D.affinis	Daff	19.38	Female	4	0	0	0	0	0	0	0	0	0.00184921	0.0108785	0.00231818	0	0	0	0	0.0222531	0	0.0173121	0	0.00908438	0	0.00885271	0	0	0	0	0	0	0	0	0	0.00317771	0	0	0	0	0.00171986	0	0	0	0	0	0	0
1.24	D.affinis	Daff	19.1	Female	5	0	0	0	0	0	0	0	0	0.00177419	0.00956443	0.00238036	0	0	0	0	0.0185361	0	0.0221937	0	0.00972558	0	0.00314234	0	0	0	0	0	0	0	0	0	0.00288561	0	0	0	0	0.00069631	0	0	0	0	0	0	0
1.46	D.affinis	Daff	23.54	Female	6	0	0	0	0	0	0	0	0	0.00141096	0.00959638	0.00302199	0	0	0	0	0.00441216	0	0.0185144	0	0.0151091	0	0.00995175	0	0	0	0	0	0	0	0	0	0.00287271	0	0	0	0	0.00162342	0	0	0	0	0	0	0
0.82	D.affinis	Daff	17	Male	1	0	0	0	0	0	0	0	0	0.00464634	0.0154265	0.00262469	0	0	0	0	0.0304325	0	0.0737285	0	0.00814389	0	0.00200782	0	0	0	0	0	0	0	0	0	0.0106273	0	0	0	0	0	0	0	0	0	0	0	0
0.82	D.affinis	Daff	17.6	Male	2	0	0	0	0	0	0	0	0	0.00392683	0.013011	0.00198726	0	0	0	0	0.0441187	0	0.0689561	0	0.00807331	0	0.00162298	0	0	0	0	0	0	0	0	0	0.00933482	0	0	0	0	0	0	0	0	0	0	0	0
0.77	D.affinis	Daff	18.8	Male	3	0	0	0	0	0	0	0	0	0.00367533	0.012625	0.00199652	0	0	0	0	0.0258167	0	0.0775043	0	0.00918375	0	0.00117601	0	0	0	0	0	0	0	0	0	0.0102233	0	0	0	0	0	0	0	0	0	0	0	0
0.8	D.affinis	Daff	19.38	Male	4	0	0	0	0	0	0	0	0	0.0034625	0.0129262	0.00276717	0	0	0	0	0.0329817	0	0.0627764	0	0.00697311	0	0.00113191	0	0	0	0	0	0	0	0	0	0.00982862	0	0	0	0	0	0	0	0	0	0	0	0
0.78	D.affinis	Daff	18.8	Male	5	0	0	0	0	0	0	0	0	0.00323077	0.012136	0.00197092	0	0	0	0	0.0425929	0	0.0635498	0	0.00655839	0	0.000967441	0	0	0	0	0	0	0	0	0	0.00840827	0	0	0	0	0	0	0	0	0	0	0	0
0.78	D.affinis	Daff	16.3	Male	6	0	0	0	0	0	0	0	0	0.0035	0.0146442	0.00271987	0	0	0	0	0.0270803	0	0.0647693	0	0.00646936	0	0.000211078	0	0	0	0	0	0	0	0	0	0.00973223	0	0	0	0	0	0	0	0	0	0	0	0
2.74	D.albomicans	Dalb	10.8	Female	1	0	0	0	0	0	0	0	0	0	0.0069583	0.00993084	0	0	0	0	0	0	0	0	0	0	0	0	0	0.00459743	0	0.00617691	0	0	0	0	0	0	0	0	0	0	0.0282989	0	0.0200065	0	0	0	0
2.59	D.albomicans	Dalb	11	Female	2	0	0	0	0	0	0	0	0	0	0.00780701	0.0118237	0	0	0	0	0	0	0	0	0	0	0	0	0	0.00709906	0	0.00558503	0	0	0	0	0	0	0	0	0	0	0.0502979	0	0.0617411	0	0	0	0
2.51	D.albomicans	Dalb	10.8	Female	3	0	0	0	0	0	0	0	0	0	0.00925647	0.0183804	0	0	0	0	0	0	0	0	0	0	0	0	0	0.00819031	0	0.00352093	0	0	0	0	0	0	0	0	0	0	0.0567508	0	0.0556872	0	0	0	0
2.67	D.albomicans	Dalb	11.67	Female	4	0	0	0	0	0	0	0	0	0	0.0109637	0.0109052	0	0	0	0	0	0	0	0	0	0	0	0	0	0.0108928	0	0.00476194	0	0	0	0	0	0	0	0	0	0	0.0699776	0	0.0598131	0	0	0	0
2.42	D.albomicans	Dalb	10.4	Female	5	0	0	0	0	0	0	0	0	0	0.0172331	0.0175457	0	0	0	0	0	0	0	0	0	0	0	0	0	0.0150086	0	0.0052711	0	0	0	0	0	0	0	0	0	0	0.118441	0	0.0751735	0	0	0	0
1.85	D.albomicans	Dalb	8.8	Male	1	0	0	0	0	0	0	0	0	0	0.0121056	0.0297741	0	0	0	0	0	0	0	0	0	0	0	0	0	0.00662579	0	0.0674645	0	0	0	0	0	0	0	0	0	0	0.0833559	0	0.310283	0	0	0	0
1.71	D.albomicans	Dalb	7.22	Male	2	0	0	0	0	0	0	0	0	0	0.0130469	0.0309441	0	0	0	0	0	0	0	0	0	0	0	0	0	0.00507862	0	0.0457333	0	0	0	0	0	0	0	0	0	0	0.108545	0	0.27123	0	0	0	0
1.82	D.albomicans	Dalb	6.7	Male	3	0	0	0	0	0	0	0	0	0	0.011564	0.0295469	0	0	0	0	0	0	0	0	0	0	0	0	0	0.00441131	0	0.0303716	0	0	0	0	0	0	0	0	0	0	0.117975	0	0.220343	0	0	0	0
1.79	D.albomicans	Dalb	8.56	Male	4	0	0	0	0	0	0	0	0	0	0.00712799	0.0141966	0	0	0	0	0	0	0	0	0	0	0	0	0	0.00318389	0	0.0463209	0	0	0	0	0	0	0	0	0	0	0.0472039	0	0.256803	0	0	0	0
1.67	D.albomicans	Dalb	8.5	Male	5	0	0	0	0	0	0	0	0	0	0.00964846	0.0218815	0	0	0	0	0	0	0	0	0	0	0	0	0	0.00465857	0	0.0410874	0	0	0	0	0	0	0	0	0	0	0.0883588	0	0.304087	0	0	0	0
2.45	D.americana	Dame	21.4	Female	1	0	0	0	0	0	0	0	0	0.000938367	0.0138379	0.0132592	0	0	0	0	0	0	0	0	0.0265235	0	0.0650186	0	0	0	0	0	0	0	0	0	0	0	0.0050513	0.000926988	0.0311244	0.00996514	0	0	0	0	0	0	0
2.35	D.americana	Dame	18.11	Female	2	0	0	0	0	0	0	0	0	0.00123149	0.0151936	0.0143801	0	0	0	0	0	0	0	0	0.031989	0	0.0804621	0	0	0	0	0	0	0	0	0	0	0	0.00564055	0.00168157	0.0566937	0.0162426	0	0	0	0	0	0	0
2.48	D.americana	Dame	23.7	Female	3	0	0	0	0	0	0	0	0	0.000975	0.0131163	0.0131236	0	0	0	0	0	0	0	0	0.0261079	0	0.0649253	0	0	0	0	0	0	0	0	0	0	0	0.00447452	0.00142045	0.0452204	0.0133951	0	0	0	0	0	0	0
2.32	D.americana	Dame	24	Female	4	0	0	0	0	0	0	0	0	0.00115647	0.015081	0.0148477	0	0	0	0	0	0	0	0	0.0261634	0	0.0669593	0	0	0	0	0	0	0	0	0	0	0	0.00472773	0.00202229	0.0490605	0.0178472	0	0	0	0	0	0	0
2.45	D.americana	Dame	24.8	Female	5	0	0	0	0	0	0	0	0	0.00131306	0.0144306	0.0116328	0	0	0	0	0	0	0	0	0.0235937	0	0.0610689	0	0	0	0	0	0	0	0	0	0	0	0.00532671	0.000989978	0.0551272	0.0169555	0	0	0	0	0	0	0
2.4	D.americana	Dame	26.7	Female	6	0	0	0	0	0	0	0	0	0.000954167	0.0117971	0.00921109	0	0	0	0	0	0	0	0	0.0134543	0	0.0392337	0	0	0	0	0	0	0	0	0	0	0	0.00398808	0.000987312	0.0424179	0.0176706	0	0	0	0	0	0	0
2.36	D.americana	Dame	19.6	Male	1	0	0	0	0	0	0	0	0	0.00195847	0.0209279	0.0120249	0	0.000196568	0.0167868	0	0	0	0	0	0.0252531	0	0.0855818	0	0	0	0	0	0	0	0	0	0	0	0.00578289	0.00200861	0.0586922	0.0110884	0	0	0	0	0	0	0
2.39	D.americana	Dame	23.2	Male	2	0	0	0	0	0	0	0	0	0.00236151	0.0226415	0.0141652	0	0.000319897	0.0306034	0	0	0	0	0	0.0292672	0	0.0967248	0	0	0	0	0	0	0	0	0	0	0	0.00732722	0.00334955	0.0616232	0.0130452	0	0	0	0	0	0	0
2.38	D.americana	Dame	22.9	Male	3	0	0	0	0	0	0	0	0	0.00188445	0.0187052	0.0121403	0	0.000148571	0.0164419	0	0	0	0	0	0.0239292	0	0.0807951	0	0	0	0	0	0	0	0	0	0	0	0.00526843	0.0028694	0.0505291	0.0190625	0	0	0	0	0	0	0
2.33	D.americana	Dame	24.2	Male	4	0	0	0	0	0	0	0	0	0.00190601	0.0198284	0.0130448	0	0.000152841	0.0129533	0	0	0	0	0	0.0248242	0	0.0923967	0	0	0	0	0	0	0	0	0	0	0	0.00604809	0.00338783	0.0578769	0.0258584	0	0	0	0	0	0	0
2.4	D.americana	Dame	23.8	Male	5	0	0	0	0	0	0	0	0	0.00262042	0.0224358	0.0113313	0	9.8747e-05	0.00130791	0	0	0	0	0	0.017412	0	0.0716199	0	0	0	0	0	0	0	0	0	0	0	0.00588423	0.00220753	0.0615648	0.0247981	0	0	0	0	0	0	0
2.41	D.americana	Dame	26.4	Male	6	0	0	0	0	0	0	0	0	0.00184274	0.0191702	0.0126117	0	0.000147767	0.0125234	0	0	0	0	0	0.0240002	0	0.0893296	0	0	0	0	0	0	0	0	0	0	0	0.00584732	0.00327537	0.0559557	0.025	0	0	0	0	0	0	0
0.99	D.ananassae	Dana	9.7	Female	1	0	0	0	0	0	0	0	0	0	0.00532704	0.0170813	0	0	0	0	0	0	0	0	0	0	0.000734509	0.00701137	0	0	0	0	0	0	0	0	0	0	0	0	0	0.0225561	0.00603086	0	0.0140218	0	0	0	0
1.28	D.ananassae	Dana	7.9	Female	2	0	0	0	0	0	0	0	0	0	0.00244929	0.0138959	0	0	0	0	0	0	0	0	0	0	0	0.00473508	0	0	0	0	0	0	0	0	0	0	0	0	0	0.0170622	0.00980603	0	0.019052	0	0	0	0
0.82	D.ananassae	Dana	8.78	Female	3	0	0	0	0	0	0	0	0	0	0.0139743	0.0286841	0	0	0	0	0	0	0	0	0	0	0.00210821	0.00933209	0	0	0	0	0	0	0	0	0	0	0	0	0	0.054857	0.00968063	0	0.0121501	0	0	0	0
1.1	D.ananassae	Dana	8.33	Female	5	0	0	0	0	0	0	0	0	0	0.00520306	0.0186714	0	0	0	0	0	0	0	0	0	0	0.000723422	0.00572538	0	0	0	0	0	0	0	0	0	0	0	0	0	0.0211316	0.0138367	0	0.0197442	0	0	0	0
1.16	D.ananassae	Dana	7.8	Female	6	0	0	0	0	0	0	0	0	0	0.00466158	0.0185671	0	0	0	0	0	0	0	0	0	0	0	0.00607141	0	0	0	0	0	0	0	0	0	0	0	0	0	0.0211624	0.0138814	0	0.0201605	0	0	0	0
0.73	D.ananassae	Dana	5.1	Male	1	0	0	0	0	0	0	0	0	0	0.00857266	0.020301	0	0	0	0	0	0	0	0	0	0	0.00135321	0.00647047	0	0	0	0	0	0	0	0	0	0	0	0	0	0.042116	0.0140651	0	0.00816599	0	0	0	0
0.77	D.ananassae	Dana	4.3	Male	2	0	0	0	0	0	0	0	0	0	0.00716467	0.0176891	0	0	0	0	0	0	0	0	0	0	0.00197783	0.00762945	0	0	0	0	0	0	0	0	0	0	0	0	0	0.0445894	0.0141862	0	0.0057928	0	0	0	0
0.8	D.ananassae	Dana	7	Male	3	0	0	0	0	0	0	0	0	0	0.00853645	0.0282098	0	0	0	0	0	0	0	0	0	0	0.00190366	0.00869773	0	0	0	0	0	0	0	0	0	0	0	0	0	0.0307701	0.025895	0	0.0372052	0	0	0	0
0.83	D.ananassae	Dana	4.22	Male	5	0	0	0	0	0	0	0	0	0	0.00436284	0.0164104	0	0	0	0	0	0	0	0	0	0	0.000562027	0.00540533	0	0	0	0	0	0	0	0	0	0	0	0	0	0.0512996	0.0154223	0	0.00657944	0	0	0	0
0.83	D.ananassae	Dana	5.6	Male	6	0	0	0	0	0	0	0	0	0	0.0051095	0.0148546	0	0	0	0	0	0	0	0	0	0	0.000661208	0.00522175	0	0	0	0	0	0	0	0	0	0	0	0	0	0.0385308	0.0132152	0	0.00748348	0	0	0	0
1.32	D.arizonae	Dari	36.78	Female	1	0	0	0	0	0	0	0	0	0	0.00124277	0.0252726	0.00191507	0	0	0	0	0	0	0	0	0	0	0.00119279	0	0.0027413	0	0.00483185	0	0	0	0	0	0	0	0	0	0	0.00651059	0	0.161851	0	0.0299356	0	0
1.34	D.arizonae	Dari	32.9	Female	2	0	0	0	0	0	0	0	0	0	0.0012877	0.0245512	0.00226066	0	0	0	0	0	0	0	0	0	0	0.000720152	0	0.00275102	0	0.00594188	0	0	0	0	0	0	0	0	0	0	0.00783111	0	0.183576	0	0.0300315	0	0
1.53	D.arizonae	Dari	35.3	Female	3	0	0	0	0	0	0	0	0	0	0.00108808	0.0204172	0.00174779	0	0	0	0	0	0	0	0	0	0	0.000763505	0	0.00291196	0	0.00444111	0	0	0	0	0	0	0	0	0	0	0.00728729	0	0.157564	0	0.0303425	0	0
1.39	D.arizonae	Dari	26.78	Female	4	0	0	0	0	0	0	0	0	0	0.00118893	0.0226948	0.00174347	0	0	0	0	0	0	0	0	0	0	0.000937843	0	0.00341676	0	0.00437858	0	0	0	0	0	0	0	0	0	0	0.00779347	0	0.15523	0	0.020231	0	0
1.47	D.arizonae	Dari	38.9	Female	5	0	0	0	0	0	0	0	0	0	0.00165327	0.0262913	0.00203231	0	0	0	0	0	0	0	0	0	0	0.000748601	0	0.00469238	0	0.00518955	0	0	0	0	0	0	0	0	0	0	0.00647702	0	0.138133	0	0.0173159	0	0
1.09	D.arizonae	Dari	38.5	Male	1	0	0	0	0	0	0	0	0	0	0.00142697	0.0257959	0.00189749	0	0	0	0	0	0	0	0	0	0	0.00215895	0	0.00344423	0	0.00615736	0	0	0	0	0	0	0	0	0	0	0.00867282	0	0.199828	0	0.0320265	0	0
1.04	D.arizonae	Dari	34.2	Male	2	0	0	0	0	0	0	0	0	0	0.00147221	0.0292829	0.00247083	0	0	0	0	0	0	0	0	0	0	0.00164415	0	0.00428394	0	0.00689431	0	0	0	0	0	0	0	0	0	0	0.00735011	0	0.19765	0	0.0319346	0	0
1.21	D.arizonae	Dari	27	Male	3	0	0	0	0	0	0	0	0	0	0.00144613	0.0260327	0.00214096	0	0	0	0	0	0	0	0	0	0	0.000671599	0	0.00469136	0	0.00647691	0	0	0	0	0	0	0	0	0	0	0.00719591	0	0.191103	0	0.0524916	0	0
1.1	D.arizonae	Dari	30.44	Male	4	0	0	0	0	0	0	0	0	0	0.0015797	0.0256452	0.0022411	0	0	0	0	0	0	0	0	0	0	0.00109275	0	0.00322788	0	0.00606349	0	0	0	0	0	0	0	0	0	0	0.0081211	0	0.206424	0	0.0426444	0	0
1.22	D.arizonae	Dari	28.17	Male	5	0	0	0	0	0	0	0	0	0	0.00168329	0.0245593	0.00227753	0	0	0	0	0	0	0	0	0	0	0.000763233	0	0.00313283	0	0.00509122	0	0	0	0	0	0	0	0	0	0	0.00545002	0	0.13678	0	0.0218578	0	0
1.06	D.azteca	Dazt	22.46	Female	1	0	0	0	0	0	0	0	0	0.00321698	0.0297483	0.00448142	0	0	0	0	0	0	0.00370891	0	0.00234748	0	0.00067306	0	0	0	0	0	0	0	0	0.0013424	0.0608467	0	0.0142814	0	0.0055398	0.000926353	0	0	0	0	0	0	0
1.16	D.azteca	Dazt	23.7	Female	2	0	0	0	0	0	0	0	0	0.00205172	0.0226584	0.00432039	0	0	0	0	0	0	0.00398268	0	0.00221495	0	0.000756969	0	0	0	0	0	0	0	0	0.00116395	0.0613254	0	0.0130503	0	0.00700197	0.00124055	0	0	0	0	0	0	0
1.18	D.azteca	Dazt	20.18	Female	3	0	0	0	0	0	0	0	0	0.00298305	0.0299772	0.00558906	0	0	0	0	0	0	0.00469053	0	0.00281494	0	0.000976683	0	0	0	0	0	0	0	0	0.00133607	0.074918	0	0.0184786	0	0.0134875	0.00103301	0	0	0	0	0	0	0
1.09	D.azteca	Dazt	21.1	Female	4	0	0	0	0	0	0	0	0	0.00218349	0.026934	0.00427346	0	0	0	0	0	0	0.00330765	0	0.00251647	0	0.00113285	0	0	0	0	0	0	0	0	0.00086783	0.0589559	0	0.0150563	0	0.00918867	0.000823197	0	0	0	0	0	0	0
1.2	D.azteca	Dazt	18	Female	5	0	0	0	0	0	0	0	0	0.00286667	0.0273815	0.00495785	0	0	0	0	0	0	0.00376688	0	0.00231473	0	0.00121194	0	0	0	0	0	0	0	0	0.000795017	0.0614402	0	0.0166467	0	0.0188994	0.00165066	0	0	0	0	0	0	0
0.86	D.azteca	Dazt	20.7	Male	1	0	0	0	0	0	0	0	0	0.00298837	0.0311842	0.00361091	0	0	0	0	0	0	0.00324426	0	0.0022609	0	0	0	0	0	0	0	0	0	0	0.00158878	0.0846561	0	0.0103624	0	0.00352574	0	0	0	0	0	0	0	0
0.9	D.azteca	Dazt	17.5	Male	2	0	0	0	0	0	0	0	0	0.0018	0.024087	0.00307463	0	0	0	0	0	0	0.003553	0	0.00210897	0	0	0	0	0	0	0	0	0	0	0.0018775	0.08806	0	0.00712421	0	0.00106712	0	0	0	0	0	0	0	0
0.92	D.azteca	Dazt	21.9	Male	3	0	0	0	0	0	0	0	0	0.00280435	0.0271825	0.00350909	0	0	0	0	0	0	0.00446039	0	0.00226441	0	0	0	0	0	0	0	0	0	0	0.00152032	0.0873272	0	0.0102905	0	0.00292297	0	0	0	0	0	0	0	0
0.91	D.azteca	Dazt	18.6	Male	4	0	0	0	0	0	0	0	0	0.00237363	0.0277749	0.00300706	0	0	0	0	0	0	0.00410127	0	0.00274715	0	0	0	0	0	0	0	0	0	0	0.00175913	0.088914	0	0.0107851	0	0.00330186	0	0	0	0	0	0	0	0
0.85	D.azteca	Dazt	23.1	Male	5	0	0	0	0	0	0	0	0	0.00305882	0.0335668	0.00340018	0	0	0	0	0	0	0.00516875	0	0.00285937	0	0	0	0	0	0	0	0	0	0	0.00159796	0.0951157	0	0.0128672	0	0.00531047	0	0	0	0	0	0	0	0
1.05	D.biarmipes	Dbia	9.8	Female	1	0	0	0.00311543	0.00212518	0.0122481	0.00498768	0	0.00372368	0.00112476	0.00158201	0	0	0	0	0	0	0	0	0	0	0	0	0	0	0	0	0	0	0	0	0	0	0.00541048	0.137027	0	0	0	0	0	0	0	0	0	0
1.04	D.biarmipes	Dbia	11.89	Female	2	0	0	0.00281357	0.0012726	0.0109601	0.00434679	0	0.0048183	0.00152885	0.00154348	0	0	0	0	0	0	0	0	0	0	0	0	0	0	0	0	0	0	0	0	0	0	0.00588077	0.130142	0	0	0	0	0	0	0	0	0	0
0.84	D.biarmipes	Dbia	9.4	Female	3	0	0	0.00348261	0.00135422	0.0147882	0.00652257	0	0.00727642	0.00279524	0.00385088	0	0	0	0	0	0	0	0	0	0	0	0	0	0	0	0	0	0	0	0	0	0	0.00669762	0.173027	0	0	0	0	0	0	0	0	0	0
1.01	D.biarmipes	Dbia	7.75	Female	4	0	0	0.00346091	0.0019684	0.0128328	0.00538002	0	0.0052592	0.00160891	0.00165429	0	0	0	0	0	0	0	0	0	0	0	0	0	0	0	0	0	0	0	0	0	0	0.00669802	0.159175	0	0	0	0	0	0	0	0	0	0
1.01	D.biarmipes	Dbia	8.3	Female	5	0	0	0.0026601	0.00136003	0.0109009	0.00421005	0	0.00634546	0.00194356	0.00163504	0	0	0	0	0	0	0	0	0	0	0	0	0	0	0	0	0	0	0	0	0	0	0.00631584	0.144175	0	0	0	0	0	0	0	0	0	0
1.23	D.biarmipes	Dbia	10.67	Female	6	0	0	0.0020978	0.00108719	0.00905717	0.0036998	0	0.0040017	0.00116504	0.00137915	0	0	0	0	0	0	0	0	0	0	0	0	0	0	0	0	0	0	0	0	0	0	0.00463089	0.115255	0	0	0	0	0	0	0	0	0	0
0.81	D.biarmipes	Dbia	4	Male	1	0	0	0.0019882	0.00267501	0.0186541	0.00278625	0	0.00821467	0.00197531	0.00126016	0	0	0	0	0	0	0	0	0	0	0	0	0	0	0	0	0	0	0	0	0	0	0.00546914	0.10422	0	0	0	0	0	0	0	0	0	0
0.76	D.biarmipes	Dbia	3	Male	2	0	0	0.00368933	0.00263824	0.0204415	0.00350255	0	0.00959552	0.0024079	0.00199861	0	0	0	0	0	0	0	0	0	0	0	0	0	0	0	0	0	0	0	0	0	0	0.0065	0.115538	0	0	0	0	0	0	0	0	0	0
0.76	D.biarmipes	Dbia	4.88	Male	3	0	0	0.00512722	0.00361694	0.0230161	0.00347209	0	0.0103508	0.00197368	0.00169482	0	0	0	0	0	0	0	0	0	0	0	0	0	0	0	0	0	0	0	0	0	0	0.00528947	0.115538	0	0	0	0	0	0	0	0	0	0
0.86	D.biarmipes	Dbia	6.13	Male	4	0	0	0.00261663	0.00115633	0.0129876	0.00218015	0	0.0159724	0.0029186	0.00146949	0	0	0	0	0	0	0	0	0	0	0	0	0	0	0	0	0	0	0	0	0	0	0.00604651	0.0955767	0	0	0	0	0	0	0	0	0	0
0.73	D.biarmipes	Dbia	4.3	Male	5	0	0	0.00401822	0.00293494	0.0203385	0.00359892	0	0.00972405	0.00232877	0.00169789	0	0	0	0	0	0	0	0	0	0	0	0	0	0	0	0	0	0	0	0	0	0	0.00628767	0.130037	0	0	0	0	0	0	0	0	0	0
0.87	D.biarmipes	Dbia	6.89	Male	6	0	0	0.00235517	0.00124526	0.0135671	0.00784479	0	0.0127593	0.00191954	0.00125705	0	0	0	0	0	0	0	0	0	0	0	0	0	0	0	0	0	0	0	0	0	0	0.00255172	0.0784878	0	0	0	0	0	0	0	0	0	0
0.75	D.bipectinata	Dbip	4.7	Female	1	0	0	0	0	0	0	0	0	0	0	0.0279997	0	0	0	0	0	0	0	0	0	0	0.00135371	0	0	0	0	0	0	0	0	0	0	0	0	0	0.00171958	0.0772003	0.0844949	0	0	0	0	0	0
0.74	D.bipectinata	Dbip	5.23	Female	2	0	0	0	0	0	0	0	0	0	0	0.0179077	0	0	0	0	0	0	0	0	0	0	0.0010939	0	0	0	0	0	0	0	0	0	0	0	0	0	0.0010939	0.058248	0.0673897	0	0	0	0	0	0
0.72	D.bipectinata	Dbip	5	Female	3	0	0	0	0	0	0	0	0	0	0	0.0347818	0	0	0	0	0	0	0	0	0	0	0.00165784	0	0	0	0	0	0	0	0	0	0	0	0	0	0.00222951	0.0942901	0.0966111	0	0	0	0	0	0
0.77	D.bipectinata	Dbip	5.4	Female	4	0	0	0	0	0	0	0	0	0	0	0.0156128	0	0	0	0	0	0	0	0	0	0	0.00147892	0	0	0	0	0	0	0	0	0	0	0	0	0	0.00181746	0.0663124	0.0532062	0	0	0	0	0	0
0.74	D.bipectinata	Dbip	6	Female	5	0	0	0	0	0	0	0	0	0	0	0.023039	0	0	0	0	0	0	0	0	0	0	0.00163158	0	0	0	0	0	0	0	0	0	0	0	0	0	0.00202093	0.0799366	0.0518382	0	0	0	0	0	0
0.78	D.bipectinata	Dbip	5.68	Female	6	0	0	0	0	0	0	0	0	0	0	0.0316727	0	0	0	0	0	0	0	0	0	0	0.00130165	0	0	0	0	0	0	0	0	0	0	0	0	0	0.00230427	0.0866897	0.100917	0	0	0	0	0	0
0.55	D.bipectinata	Dbip	4.2	Male	1	0	0	0	0	0	0	0	0	0	0.00156865	0.0465108	0	0	0	0	0	0	0	0	0	0	0.00436548	0	0	0	0	0	0	0	0	0	0	0	0	0	0.0251701	0.136086	0.0152511	0	0	0	0	0	0
0.5	D.bipectinata	Dbip	4	Male	2	0	0	0	0	0	0	0	0	0	0.00126376	0.0359117	0	0	0	0	0	0	0	0	0	0	0.00332026	0	0	0	0	0	0	0	0	0	0	0	0	0	0.0141042	0.113803	0.0165716	0	0	0	0	0	0
0.46	D.bipectinata	Dbip	4.73	Male	3	0	0	0	0	0	0	0	0	0	0.00134724	0.0471555	0	0	0	0	0	0	0	0	0	0	0.00453359	0	0	0	0	0	0	0	0	0	0	0	0	0	0.0238013	0.156013	0.0220155	0	0	0	0	0	0
0.48	D.bipectinata	Dbip	3.45	Male	4	0	0	0	0	0	0	0	0	0	0.00146831	0.038529	0	0	0	0	0	0	0	0	0	0	0.00262968	0	0	0	0	0	0	0	0	0	0	0	0	0	0.0111476	0.112795	0.0252539	0	0	0	0	0	0
0.52	D.bipectinata	Dbip	5.64	Male	5	0	0	0	0	0	0	0	0	0	0.00130863	0.0385807	0	0	0	0	0	0	0	0	0	0	0.00395771	0	0	0	0	0	0	0	0	0	0	0	0	0	0.0182582	0.151718	0.0279342	0	0	0	0	0	0
0.5	D.bipectinata	Dbip	3.8	Male	6	0	0	0	0	0	0	0	0	0	0.00206576	0.0447974	0	0	0	0	0	0	0	0	0	0	0.00359466	0	0	0	0	0	0	0	0	0	0	0	0	0	0.0184123	0.133509	0.0144235	0	0	0	0	0	0
0.96	D.birchii	Dbir	9.7	Female	1	0.00786322	0	0.0183331	0	0	0	0	0	0	0	0	0	0	0	0	0.0499518	0	0.0370555	0	0.0056542	0	0	0	0	0	0	0	0	0	0	0	0	0	0	0	0	0	0	0	0	0	0	0	0
0.81	D.birchii	Dbir	10.9	Female	2	0.0114846	0	0.0232814	0	0	0	0	0	0	0	0	0	0	0	0	0.0643501	0	0.0585568	0	0.00652981	0	0	0	0	0	0	0	0	0	0	0	0	0	0	0	0	0	0	0	0	0	0	0	0
0.99	D.birchii	Dbir	9	Female	3	0.00643091	0	0.0134639	0	0	0	0	0	0	0	0	0	0	0	0	0.0355116	0	0.0299759	0	0.00375266	0	0	0	0	0	0	0	0	0	0	0	0	0	0	0	0	0	0	0	0	0	0	0	0
0.83	D.birchii	Dbir	7.5	Female	4	0.0126089	0	0.0235693	0	0	0	0	0	0	0	0	0	0	0	0	0.0710284	0	0.0629957	0	0.00690235	0	0	0	0	0	0	0	0	0	0	0	0	0	0	0	0	0	0	0	0	0	0	0	0
0.67	D.birchii	Dbir	8.78	Female	5	0.00596416	0	0.0229634	0	0	0	0	0	0	0	0	0	0	0	0	0.0604129	0	0.0280277	0	0.00381757	0	0	0	0	0	0	0	0	0	0	0	0	0	0	0	0	0	0	0	0	0	0	0	0
0.97	D.birchii	Dbir	9.36	Female	6	0.00939158	0	0.0171287	0	0	0	0	0	0	0	0	0	0	0	0	0.0441744	0	0.0446021	0	0.00428344	0	0	0	0	0	0	0	0	0	0	0	0	0	0	0	0	0	0	0	0	0	0	0	0
0.65	D.birchii	Dbir	7.5	Male	1	0.00468489	0	0.0102533	0	0	0	0	0	0	0	0	0	0	0	0	0.0489989	0	0.0201799	0	0.0016025	0	0	0	0	0	0	0	0	0	0	0	0	0	0	0	0	0	0	0	0	0	0	0	0
0.68	D.birchii	Dbir	7.11	Male	2	0.0116301	0	0.0197922	0	0	0	0	0	0	0	0	0	0	0	0	0.0727404	0	0.0433482	0	0.0010212	0	0	0	0	0	0	0	0	0	0	0	0	0	0	0	0	0	0	0	0	0	0	0	0
0.54	D.birchii	Dbir	8	Male	3	0.00945818	0	0.0174278	0	0	0	0	0	0	0	0	0	0	0	0	0.0664359	0	0.0350603	0	0.000750143	0	0	0	0	0	0	0	0	0	0	0	0	0	0	0	0	0	0	0	0	0	0	0	0
0.62	D.birchii	Dbir	7.82	Male	4	0.00526388	0	0.0203276	0	0	0	0	0	0	0	0	0	0	0	0	0.0426729	0	0.021317	0	0.00235206	0	0	0	0	0	0	0	0	0	0	0	0	0	0	0	0	0	0	0	0	0	0	0	0
0.67	D.birchii	Dbir	6.1	Male	5	0.00619429	0	0.014615	0	0	0	0	0	0	0	0	0	0	0	0	0.0585887	0	0.0269325	0	0.000984622	0	0	0	0	0	0	0	0	0	0	0	0	0	0	0	0	0	0	0	0	0	0	0	0
0.7	D.birchii	Dbir	8	Male	6	0.00956321	0	0.0169363	0	0	0	0	0	0	0	0	0	0	0	0	0.0622402	0	0.0362993	0	0.0025958	0	0	0	0	0	0	0	0	0	0	0	0	0	0	0	0	0	0	0	0	0	0	0	0
1.86	D.borealis	Dbor	18	Female	1	0	0	0	0	0	0	0	0	0.00140323	0.0139743	0.00664518	0	0	0	0	0.0231145	0.0165176	0.0167633	0	0.00802065	0	0	0	0	0.000863288	0	0	0	0	0	0	0	0.00133871	0.0681849	0	0.0192745	0	0.00335481	0	0	0	0	0	0
1.67	D.borealis	Dbor	14.56	Female	2	0	0	0	0	0	0	0	0	0.00123952	0.0174196	0.0075485	0	0	0	0	0.0319005	0.00300159	0.0221042	0	0.00954998	0	0	0	0	0.0012459	0	0	0	0	0	0	0	0.00217964	0.0778413	0	0.0152071	0	0.00866744	0	0	0	0	0	0
1.81	D.borealis	Dbor	15.78	Female	3	0	0	0	0	0	0	0	0	0.00161878	0.0161327	0.00755069	0	0	0	0	0.0255802	0.00326077	0.0198139	0	0.00996867	0	0	0	0	0.00112454	0	0	0	0	0	0	0	0.00134807	0.0754908	0	0.0216944	0	0.005256	0	0	0	0	0	0
1.71	D.borealis	Dbor	17.7	Female	4	0	0	0	0	0	0	0	0	0.00164912	0.0168061	0.00899915	0	0	0	0	0.0283794	0.0035933	0.0214547	0	0.00975975	0	0	0	0	0.00116385	0	0	0	0	0	0	0	0.00107018	0.0742337	0	0.0224656	0	0.00427721	0	0	0	0	0	0
1.71	D.borealis	Dbor	15.6	Female	5	0	0	0	0	0	0	0	0	0.00236842	0.0178222	0.0101229	0	0	0	0	0.0447765	0.00647739	0.0268422	0	0.00982067	0	0	0	0	0.00129611	0	0	0	0	0	0	0	0.00180702	0.091452	0	0.0238216	0	0.00388837	0	0	0	0	0	0
1.86	D.borealis	Dbor	18.6	Male	1	0	0	0	0	0	0	0	0	0.0016828	0.0196646	0.00928176	0	0	0	0	0.00900615	0.00143442	0.00989632	0	0.0109576	0	0	0	0	0.00136181	0	0	0	0	0	0	0	0.00265591	0.0835293	0	0.0289818	0	0.00585716	0	0	0	0	0	0
1.68	D.borealis	Dbor	13.6	Male	2	0	0	0	0	0	0	0	0	0.00185119	0.0199271	0.010624	0	0	0	0	0.00774579	0.00163623	0.0098297	0	0.0114221	0	0	0	0	0.00141348	0	0	0	0	0	0	0	0.00310714	0.0785078	0	0.0147327	0	0.0112341	0	0	0	0	0	0
1.76	D.borealis	Dbor	17.6	Male	3	0	0	0	0	0	0	0	0	0.00175568	0.0187865	0.0101673	0	0	0	0	0.00792475	0.0012403	0.00915128	0	0.0130072	0	0	0	0	0.00167048	0	0	0	0	0	0	0	0.00321023	0.0857895	0	0.0322032	0	0.00900886	0	0	0	0	0	0
1.75	D.borealis	Dbor	19	Male	4	0	0	0	0	0	0	0	0	0.00164571	0.0192966	0.0111917	0	0	0	0	0.0133108	0.00258717	0.0129513	0	0.0111305	0	0	0	0	0.00173172	0	0	0	0	0	0	0	0.00314857	0.0837931	0	0.0288513	0	0.00911879	0	0	0	0	0	0
1.85	D.borealis	Dbor	20.1	Male	5	0	0	0	0	0	0	0	0	0.00236216	0.0219647	0.0106781	0	0	0	0	0.0146121	0.00131107	0.013632	0	0.010898	0	0	0	0	0.00146696	0	0	0	0	0	0	0	0.00367568	0.0861829	0	0.0286267	0	0.00970412	0	0	0	0	0	0
1.87	D.buzzatii	Dbuz	31.2	Female	1	0	0	0	0	0	0	0	0	0	0.00232634	0.00786745	0.00033516	0	0	0	0	0	0	0	0	0	0	0	0	0.00238251	0	0	0	0	0	0	0	0	0	0	0	0	0.0175483	0	0.0166746	0	0	0	0
1.76	D.buzzatii	Dbuz	28.4	Female	2	0	0	0	0	0	0	0	0	0	0.00223008	0.0104555	0.000415458	0	0	0	0	0	0	0	0	0	0	0	0	0.00350801	0	0	0	0	0	0	0	0	0	0	0	0	0.0152014	0	0.025083	0	0	0	0
1.92	D.buzzatii	Dbuz	28.5	Female	3	0	0	0	0	0	0	0	0	0	0.00205057	0.00920789	0.000402599	0	0	0	0	0	0	0	0	0	0	0	0	0.00277985	0	0	0	0	0	0	0	0	0	0	0	0	0.00996505	0	0.0173694	0	0	0	0
1.73	D.buzzatii	Dbuz	30.9	Female	4	0	0	0	0	0	0	0	0	0	0.00292199	0.010859	0.000519271	0	0	0	0	0	0	0	0	0	0	0	0	0.00346426	0	0	0	0	0	0	0	0	0	0	0	0	0.0113209	0	0.020024	0	0	0	0
2.1	D.buzzatii	Dbuz	36.1	Female	5	0	0	0	0	0	0	0	0	0	0.00280642	0.0107759	0.000447677	0	0	0	0	0	0	0	0	0	0	0	0	0.00399544	0	0	0	0	0	0	0	0	0	0	0	0	0.0176726	0	0.028585	0	0	0	0
1.79	D.buzzatii	Dbuz	25.8	Female	6	0	0	0	0	0	0	0	0	0	0.00268148	0.0108643	0.000420167	0	0	0	0	0	0	0	0	0	0	0	0	0.00352502	0	0	0	0	0	0	0	0	0	0	0	0	0.0131525	0	0.0247092	0	0	0	0
1.5	D.buzzatii	Dbuz	33.7	Male	1	0	0	0	0	0	0	0	0	0	0.00290017	0.00980808	0.000389977	0	0	0	0	0	0	0	0	0	0	0	0	0.0029702	0	0	0	0	0	0	0	0	0	0	0	0	0.0218769	0	0.0207877	0	0	0	0
1.4	D.buzzatii	Dbuz	36.5	Male	2	0	0	0	0	0	0	0	0	0	0.00372358	0.0112114	0.000447677	0	0	0	0	0	0	0	0	0	0	0	0	0.00520161	0	0	0	0	0	0	0	0	0	0	0	0	0.0378329	0	0.0595224	0	0	0	0
1.5	D.buzzatii	Dbuz	32.4	Male	3	0	0	0	0	0	0	0	0	0	0.00283536	0.00958261	0.000362121	0	0	0	0	0	0	0	0	0	0	0	0	0.00290989	0	0	0	0	0	0	0	0	0	0	0	0	0.024244	0	0.019287	0	0	0	0
1.5	D.buzzatii	Dbuz	38.63	Male	4	0	0	0	0	0	0	0	0	0	0.00400191	0.0111814	0.000389977	0	0	0	0	0	0	0	0	0	0	0	0	0.0040256	0	0	0	0	0	0	0	0	0	0	0	0	0.0319937	0	0.0502739	0	0	0	0
1.5	D.buzzatii	Dbuz	33.5	Male	5	0	0	0	0	0	0	0	0	0	0.00375887	0.0117144	0.000334266	0	0	0	0	0	0	0	0	0	0	0	0	0.00425176	0	0	0	0	0	0	0	0	0	0	0	0	0.0317223	0	0.0492457	0	0	0	0
1.42	D.buzzatii	Dbuz	40.2	Male	6	0	0	0	0	0	0	0	0	0	0.00327749	0.0117031	0.000397235	0	0	0	0	0	0	0	0	0	0	0	0	0.00444351	0	0	0	0	0	0	0	0	0	0	0	0	0.0306427	0	0.0553667	0	0	0	0
0.97	D.elegans	Dele	10.6	Female	1	0.0144781	0.00275034	0	0	0	0.00372265	0.00373412	0	0	0.00229251	0	0	0	0	0.00100823	0.116877	0.00216709	0.0198356	0	0.00416412	0	0.00142859	0	0	0	0	0	0	0	0	0	0	0	0	0	0	0	0	0	0	0	0	0	0
1.03	D.elegans	Dele	9.5	Female	2	0.0136347	0.00259013	0	0	0	0.0035058	0.0035166	0	0	0.00215896	0	0	0	0	0.000949498	0.110069	0.00204085	0.0187153	0	0.00392155	0	0.00134537	0	0	0	0	0	0	0	0	0	0	0	0	0	0	0	0	0	0	0	0	0	0
1.06	D.elegans	Dele	12.5	Female	3	0.0163277	0.00318212	0	0	0	0.00587416	0.00182503	0	0	0.00174248	0	0	0	0	0.00158164	0.117236	0.00220428	0.0134341	0	0.00364679	0	0.0014885	0	0	0	0	0	0	0	0	0	0	0	0	0	0	0	0	0	0	0	0	0	0
1.05	D.elegans	Dele	11.2	Female	4	0.0131364	0.00221765	0	0	0	0.00382481	0.00351495	0	0	0.000821675	0	0	0	0	0.000899732	0.0826514	0.00138598	0.00810964	0	0.00155417	0	0.00071867	0	0	0	0	0	0	0	0	0	0	0	0	0	0	0	0	0	0	0	0	0	0
1.05	D.elegans	Dele	8.44	Female	5	0.0144764	0.0027879	0	0	0	0.00758349	0.00503069	0	0	0.00188638	0	0	0	0	0.00135593	0.117476	0.00279507	0.0176514	0	0.00459638	0	0.00165948	0	0	0	0	0	0	0	0	0	0	0	0	0	0	0	0	0	0	0	0	0	0
1.06	D.elegans	Dele	7.67	Female	6	0.00934571	0.00176993	0	0	0	0.00456394	0.00170854	0	0	0.00108905	0	0	0	0	0.000947731	0.074628	0.00151783	0.0129897	0	0.00272963	0	0.00125552	0	0	0	0	0	0	0	0	0	0	0	0	0	0	0	0	0	0	0	0	0	0
0.94	D.elegans	Dele	14.1	Male	1	0.00790067	0.00185433	0	0	0	0.0026841	0	0	0.000904255	0.00184858	0	0	0	0	0.00139429	0.11263	0.000688078	0.0091261	0	0.00262254	0	0	0	0	0	0	0	0	0	0	0	0	0	0	0	0	0	0	0	0	0	0	0	0
0.88	D.elegans	Dele	6.5	Male	2	0.0075925	0.00212441	0	0	0	0.00846979	0.001029	0	0.000931818	0.00191939	0	0	0	0	0.00217733	0.117687	0.00181911	0.0151938	0	0.00689157	0	0	0	0	0	0	0	0	0	0	0	0	0	0	0	0	0	0	0	0	0	0	0	0
0.9	D.elegans	Dele	11.44	Male	3	0.00788062	0.00226939	0	0	0	0.000990189	0	0	0.000855556	0.00202526	0	0	0	0	0.00148582	0.108225	0.00104206	0.0119876	0	0.00383216	0	0	0	0	0	0	0	0	0	0	0	0	0	0	0	0	0	0	0	0	0	0	0	0
0.9	D.elegans	Dele	8.5	Male	4	0.00417587	0.00126406	0	0	0	0.00680272	0	0	0.000477778	0.00152569	0	0	0	0	0.000887059	0.0709919	0.00147325	0.0150675	0	0.00880882	0	0	0	0	0	0	0	0	0	0	0	0	0	0	0	0	0	0	0	0	0	0	0	0
0.91	D.elegans	Dele	7.5	Male	5	0.00657268	0.00185698	0	0	0	0.00641001	0	0	0.000912088	0.00169587	0	0	0	0	0.00142563	0.0983534	0.00146595	0.0143146	0	0.0063337	0	0	0	0	0	0	0	0	0	0	0	0	0	0	0	0	0	0	0	0	0	0	0	0
0.84	D.elegans	Dele	8.5	Male	6	0.00715864	0.00228893	0	0	0	0.00585571	0.00109434	0	0.000738095	0.00189506	0	0	0	0	0.0017662	0.107149	0.00172286	0.0128978	0	0.00436767	0	0	0	0	0	0	0	0	0	0	0	0	0	0	0	0	0	0	0	0	0	0	0	0
1	D.equinoxialis	Dequ	6.3	Female	1	0	0	0	0	0	0	0	0	0	0.000218728	0.00986958	0	0	0	0	0	0	0	0	0	0	0	0	0	0	0	0	0	0	0	0	0	0	0	0	0	0	0	0	0.0137565	0	0	0	0
0.97	D.equinoxialis	Dequ	7.3	Female	2	0	0	0	0	0	0	0	0	0	0.000175383	0.00725867	0	0	0	0	0	0	0	0	0	0	0	0	0	0	0	0	0	0	0	0	0	0	0	0	0	0	0	0	0.00992741	0	0	0	0
0.96	D.equinoxialis	Dequ	8.4	Female	3	0	0	0	0	0	0	0	0	0	0.000164552	0.00872748	0	0	0	0	0	0	0	0	0	0	0	0	0	0	0	0	0	0	0	0	0	0	0	0	0	0	0	0	0.0106387	0	0	0	0
0.9	D.equinoxialis	Dequ	8.7	Female	4	0	0	0	0	0	0	0	0	0	0.00016202	0.00756702	0	0	0	0	0	0	0	0	0	0	0	0	0	0	0	0	0	0	0	0	0	0	0	0	0	0	0	0	0.0115796	0	0	0	0
1.06	D.equinoxialis	Dequ	7.9	Female	5	0	0	0	0	0	0	0	0	0	0.000378302	0.00903536	0	0	0	0	0	0	0	0	0	0	0	0	0	0	0	0	0	0	0	0	0	0	0	0	0	0	0	0	0.0148656	0	0	0	0
0.64	D.equinoxialis	Dequ	6.2	Male	1	0	0	0	0	0	0	0	0	0	0	0.019865	0	0	0	0	0	0	0	0	0	0	0	0	0	0	0	0	0	0	0	0	0	0	0.0158052	0	0	0	0	0	0.0220157	0	0	0	0
0.64	D.equinoxialis	Dequ	7.5	Male	2	0	0	0	0	0	0	0	0	0	0	0.0155894	0	0	0	0	0	0	0	0	0	0	0	0	0	0	0	0	0	0	0	0	0	0	0.028482	0	0	0	0	0	0.0200616	0	0	0	0
0.63	D.equinoxialis	Dequ	6.8	Male	3	0	0	0	0	0	0	0	0	0	0	0.0163492	0	0	0	0	0	0	0	0	0	0	0	0	0	0	0	0	0	0	0	0	0	0	0.0188485	0	0	0	0	0	0.023887	0	0	0	0
0.66	D.equinoxialis	Dequ	7.6	Male	4	0	0	0	0	0	0	0	0	0	0	0.0144415	0	0	0	0	0	0	0	0	0	0	0	0	0	0	0	0	0	0	0	0	0	0	0.0229368	0	0	0	0	0	0.0185694	0	0	0	0
0.64	D.equinoxialis	Dequ	7.33	Male	5	0	0	0	0	0	0	0	0	0	0	0.0145084	0	0	0	0	0	0	0	0	0	0	0	0	0	0	0	0	0	0	0	0	0	0	0.025028	0	0	0	0	0	0.0209735	0	0	0	0
0.88	D.erecta	Dere	6.3	Female	1	0	0	0	0	0	0	0	0	0.00205682	0.0121101	0.00235838	0	0	0	0	0	0	0	0	0	0	0.00367947	0.0157371	0	0	0	0	0	0	0	0	0	0	0	0	0	0.0312626	0.0291948	0	0	0	0	0	0
1.17	D.erecta	Dere	8.4	Female	2	0	0	0	0	0	0	0	0	0.00178633	0.00901498	0.00141906	0	0	0	0	0	0	0	0	0	0	0.00327171	0.0102882	0	0	0	0	0	0	0	0	0	0	0	0	0	0.0225443	0.0183052	0	0	0	0	0	0
0.93	D.erecta	Dere	8.1	Female	3	0	0	0	0	0	0	0	0	0.00212903	0.0182012	0.00619886	0	0	0	0	0	0	0	0	0	0	0.00467663	0.020771	0	0	0	0	0	0	0	0	0	0	0	0	0	0.0455287	0.058509	0	0	0	0	0	0
1.05	D.erecta	Dere	5.78	Female	4	0	0	0	0	0	0	0	0	0.00167619	0.00804316	0.000951672	0	0	0	0	0	0	0	0	0	0	0.00237814	0.00861006	0	0	0	0	0	0	0	0	0	0	0	0	0	0.0292645	0.0203757	0	0	0	0	0	0
0.99	D.erecta	Dere	7	Female	5	0	0	0	0	0	0	0	0	0.00112121	0.0178345	0.00644431	0	0	0	0	0	0	0	0	0	0	0.000803802	0.0165366	0	0	0	0	0	0	0	0	0	0	0	0	0	0.037793	0.0578871	0	0	0	0	0	0
0.64	D.erecta	Dere	3.2	Male	1	0.00116	0.00155984	0	0	0	0.00121437	0	0.00378422	0.0091875	0.00179188	0	0	0	0	0.00161219	0.11889	0.00187313	0.0226078	0	0	0	0	0	0	0	0	0	0	0	0	0	0	0	0	0	0	0	0	0	0	0	0	0	0
0.61	D.erecta	Dere	2.7	Male	2	0.00112691	0.00174504	0	0	0	0.00132812	0	0.0046919	0.013541	0.00141436	0	0	0	0	0.00186501	0.133583	0.00239897	0.0238643	0	0	0	0	0	0	0	0	0	0	0	0	0	0	0	0	0	0	0	0	0	0	0	0	0	0
0.62	D.erecta	Dere	3.6	Male	3	0.00122271	0.0019315	0	0	0	0.00110136	0	0.00340349	0.0104355	0.00160714	0	0	0	0	0.00188858	0.12207	0.00256892	0.0214777	0	0	0	0	0	0	0	0	0	0	0	0	0	0	0	0	0	0	0	0	0	0	0	0	0	0
0.6	D.erecta	Dere	3.11	Male	4	0.00110286	0.00191827	0	0	0	0	0	0.00313964	0.0107833	0.00109364	0	0	0	0	0.00157453	0.110298	0.00137444	0.017302	0	0	0	0	0	0	0	0	0	0	0	0	0	0	0	0	0	0	0	0	0	0	0	0	0	0
0.58	D.erecta	Dere	3	Male	5	0.000819668	0.00121588	0	0	0	0	0	0.00347094	0.0122069	0.00150847	0	0	0	0	0.000986471	0.098037	0	0.0203507	0	0	0	0	0	0	0	0	0	0	0	0	0	0	0	0	0	0	0	0	0	0	0	0	0	0
1.28	D.ficusphila	Dfic	14.8	Female	1	0.00504417	0.0004366	0.0194621	0	0	0	0	0	0	0.000721497	0	0	0	0	0	0	0.00644267	0.0679327	0	0.0172429	0	0	0	0	0	0	0	0	0	0	0	0	0	0	0	0	0	0	0	0	0	0	0	0
1.42	D.ficusphila	Dfic	14.5	Female	2	0.00398586	0.00039824	0.0145308	0	0	0	0	0	0	0.000325182	0	0	0	0	0	0	0.00461182	0.0518384	0	0.0132445	0	0	0	0	0	0	0	0	0	0	0	0	0	0	0	0	0	0	0	0	0	0	0	0
1.35	D.ficusphila	Dfic	9.33	Female	3	0.00346919	0.000418889	0.0164559	0	0	0	0	0	0	0.000378048	0	0	0	0	0	0	0.00353341	0.050923	0	0.0135797	0	0	0	0	0	0	0	0	0	0	0	0	0	0	0	0	0	0	0	0	0	0	0	0
1.3	D.ficusphila	Dfic	11.7	Female	4	0.00431425	0.000440118	0.015662	0	0	0	0	0	0	0.000616924	0	0	0	0	0	0	0.00578382	0.0536968	0	0.0128556	0	0	0	0	0	0	0	0	0	0	0	0	0	0	0	0	0	0	0	0	0	0	0	0
1.33	D.ficusphila	Dfic	14.2	Female	5	0.00469031	0.00047521	0.0182331	0	0	0	0	0	0	0.000347187	0	0	0	0	0	0	0.005471	0.0644185	0	0.0165686	0	0	0	0	0	0	0	0	0	0	0	0	0	0	0	0	0	0	0	0	0	0	0	0
1.33	D.ficusphila	Dfic	8.64	Female	6	0.00343924	0.000360159	0.0143789	0	0	0	0	0	0	0.000411142	0	0	0	0	0	0	0.00352575	0.048903	0	0.0154808	0	0	0	0	0	0	0	0	0	0	0	0	0	0	0	0	0	0	0	0	0	0	0	0
0.89	D.ficusphila	Dfic	15.44	Male	1	0.00354426	0.000358811	0.017392	0	0	0	0	0	0	0.000505176	0	0	0	0	0	0	0.0043604	0.047512	0	0.0179326	0	0	0	0	0	0	0	0	0	0	0	0	0	0	0	0	0	0	0	0	0	0	0	0
0.96	D.ficusphila	Dfic	12.27	Male	2	0.00162618	0.000173254	0.0133379	0	0	0	0	0	0	0.000721497	0	0	0	0	0	0	0.00320028	0.0309032	0	0.021785	0	0	0	0	0	0	0	0	0	0	0	0	0	0	0	0	0	0	0	0	0	0	0	0
1	D.ficusphila	Dfic	8.9	Male	3	0.00321221	0.000419136	0.0176645	0	0	0	0	0	0	0.000510364	0	0	0	0	0	0	0.0047701	0.0554026	0	0.0230662	0	0	0	0	0	0	0	0	0	0	0	0	0	0	0	0	0	0	0	0	0	0	0	0
0.87	D.ficusphila	Dfic	14.44	Male	4	0.002459	0.000244706	0.0146186	0	0	0	0	0	0	0.000488855	0	0	0	0	0	0	0.00455357	0.0350059	0	0.0132365	0	0	0	0	0	0	0	0	0	0	0	0	0	0	0	0	0	0	0	0	0	0	0	0
0.91	D.ficusphila	Dfic	10.08	Male	5	0.00278156	0.000365546	0.0172468	0	0	0	0	0	0	0.000413953	0	0	0	0	0	0	0.00479764	0.0439195	0	0.0158978	0	0	0	0	0	0	0	0	0	0	0	0	0	0	0	0	0	0	0	0	0	0	0	0
0.95	D.ficusphila	Dfic	11.6	Male	6	0.00297552	0.000378167	0.0167174	0	0	0	0	0	0	0.000332568	0	0	0	0	0	0	0.00510626	0.042547	0	0.0214539	0	0	0	0	0	0	0	0	0	0	0	0	0	0	0	0	0	0	0	0	0	0	0	0
1.79	D.flavomontana	Dfla	21.2	Female	1	0	0	0	0	0	0	0	0	0.00203352	0.0209631	0.0121354	0.000793648	0	0	0	0.00224118	0.000478772	0.0207033	0	0.0158475	0	0	0	0	0.00126345	0	0	0	0	0	0	0	0.00146369	0.0816103	0	0.0300692	0	0.0181158	0	0	0	0	0	0
1.87	D.flavomontana	Dfla	21.5	Female	2	0	0	0	0	0	0	0	0	0.0027754	0.0235883	0.015143	0.000882587	0	0	0	0.00467123	0.000907932	0.0315115	0	0.0196504	0	0	0	0	0.00151175	0	0	0	0	0	0	0	0.00140107	0.10009	0	0.0374477	0	0.0210879	0	0	0	0	0	0
1.8	D.flavomontana	Dfla	22.6	Female	3	0	0	0	0	0	0	0	0	0.00260556	0.0209951	0.0127085	0.000835665	0	0	0	0.00377846	0.000992648	0.0273571	0	0.0166982	0	0	0	0	0.00121874	0	0	0	0	0	0	0	0.00243333	0.0936307	0	0.0325318	0	0.0166228	0	0	0	0	0	0
1.83	D.flavomontana	Dfla	21.2	Female	4	0	0	0	0	0	0	0	0	0.00220765	0.0182871	0.0116433	0.000707803	0	0	0	0.00409367	0.00105148	0.0295618	0	0.0161651	0	0	0	0	0.000852724	0	0	0	0	0	0	0	0.00255738	0.0923234	0	0.0316161	0	0.0138349	0	0	0	0	0	0
1.75	D.flavomontana	Dfla	23.1	Female	5	0	0	0	0	0	0	0	0	0.00281143	0.0249488	0.015584	0.000787912	0	0	0	0.00516409	0.00101639	0.0313532	0	0.0189278	0	0	0	0	0.0011114	0	0	0	0	0	0	0	0.00134857	0.0982767	0	0.0352959	0	0.0207511	0	0	0	0	0	0
1.66	D.flavomontana	Dfla	21.3	Male	1	0	0	0	0	0	0	0	0	0.00339759	0.0244055	0.0129561	0.000969069	0	0	0	0.00201391	0.000457821	0.0174187	0	0.0148226	0	0	0	0	0.00140326	0	0	0	0	0	0	0	0.00343373	0.0976926	0	0.0346721	0	0.0185177	0	0	0	0	0	0
1.65	D.flavomontana	Dfla	18.5	Male	2	0	0	0	0	0	0	0	0	0.00343636	0.0277055	0.0136029	0.000936957	0	0	0	0.00134639	0.000289097	0.0141095	0	0.019079	0	0	0	0	0.00176814	0	0	0	0	0	0	0	0.00371515	0.105061	0	0.0414263	0	0.0241786	0	0	0	0	0	0
1.57	D.flavomontana	Dfla	19.67	Male	3	0	0	0	0	0	0	0	0	0.00335032	0.0261916	0.0126119	0.000864939	0	0	0	0.00136462	0.00027808	0.0134263	0	0.0165864	0	0	0	0	0.00157014	0	0	0	0	0	0	0	0.00332484	0.0965993	0	0.0370092	0	0.0227393	0	0	0	0	0	0
1.53	D.flavomontana	Dfla	19.4	Male	4	0	0	0	0	0	0	0	0	0.00477124	0.0290445	0.0149512	0.000983135	0	0	0	0.00241998	0.000428025	0.0206808	0	0.0173151	0	0	0	0	0.00140424	0	0	0	0	0	0	0	0.00244444	0.114269	0	0.0399675	0	0.0196899	0	0	0	0	0	0
1.59	D.flavomontana	Dfla	18.5	Male	5	0	0	0	0	0	0	0	0	0.00419497	0.0271537	0.0138649	0.000932896	0	0	0	0.00174989	0.000371194	0.0179121	0	0.0181175	0	0	0	0	0.00149349	0	0	0	0	0	0	0	0.00261635	0.109433	0	0.0416348	0	0.0198155	0	0	0	0	0	0
0.88	D.gunungcola	Dgun	12.6	Female	1	0.00545346	0.00226049	0	0	0.00265583	0.00491879	0.00191769	0	0.000772727	0.00538534	0	0	0	0.00102937	0	0.063545	0.000836054	0.00815274	0	0.00326166	0	0	0	0	0	0	0	0	0	0	0	0	0	0	0	0	0	0	0	0	0	0	0	0
0.83	D.gunungcola	Dgun	11.44	Female	2	0.00554977	0.00179549	0	0	0.00157162	0.00354181	0.0014216	0	0.000481928	0.00327945	0	0	0	0.00088239	0	0.0616388	0.000214299	0.00543516	0	0.0033187	0	0	0	0	0	0	0	0	0	0	0	0	0	0	0	0	0	0	0	0	0	0	0	0
0.9	D.gunungcola	Dgun	13.8	Female	3	0.00638159	0.00227679	0	0	0.00187212	0.00432082	0.00152445	0	0.000577778	0.00460408	0	0	0	0.00116353	0	0.0668061	0.000395263	0.00627056	0	0.00245618	0	0	0	0	0	0	0	0	0	0	0	0	0	0	0	0	0	0	0	0	0	0	0	0
0.81	D.gunungcola	Dgun	11.8	Female	4	0.00598819	0.00218479	0	0	0.0020354	0.0048152	0.0018124	0	0.000765432	0.00562571	0	0	0	0.00116591	0	0.0734213	0.000548976	0.00734753	0	0.00230044	0	0	0	0	0	0	0	0	0	0	0	0	0	0	0	0	0	0	0	0	0	0	0	0
0.96	D.gunungcola	Dgun	12.78	Female	5	0.00510608	0.00148998	0	0	0.0013588	0.00317069	0.00115763	0	0.000583333	0.00386064	0	0	0	0.000776284	0	0.0586465	0.000210545	0.00545403	0	0.00295369	0	0	0	0	0	0	0	0	0	0	0	0	0	0	0	0	0	0	0	0	0	0	0	0
0.83	D.gunungcola	Dgun	10.6	Male	1	0.00220598	0.000929809	0	0	0.00144065	0.00266333	0.000644678	0	0.00187952	0.0042018	0	0	0	0.000743066	0	0.0554368	0.000438339	0.00372167	0	0.00507567	0	0	0	0	0	0	0	0	0	0	0	0	0	0	0	0	0	0	0	0	0	0	0	0
0.81	D.gunungcola	Dgun	8.22	Male	2	0.00203043	0.000657081	0	0	0.00143149	0.00254334	0.000525089	0	0.00146914	0.00309039	0	0	0	0.00057106	0	0.0519505	0.000389274	0.00308663	0	0.00498666	0	0	0	0	0	0	0	0	0	0	0	0	0	0	0	0	0	0	0	0	0	0	0	0
0.83	D.gunungcola	Dgun	10.2	Male	3	0.00260073	0.00121837	0	0	0.00209549	0.00343026	0.000727329	0	0.0026747	0.00490453	0	0	0	0.000789507	0	0.060097	0.000769528	0.00514048	0	0.00595415	0	0	0	0	0	0	0	0	0	0	0	0	0	0	0	0	0	0	0	0	0	0	0	0
0.78	D.gunungcola	Dgun	9.7	Male	4	0.00280039	0.000673824	0	0	0.00117298	0.00204764	0.000598054	0	0.00208974	0.00436209	0	0	0	0.000560078	0	0.0558105	0.000145114	0.00249692	0	0.00268568	0	0	0	0	0	0	0	0	0	0	0	0	0	0	0	0	0	0	0	0	0	0	0	0
0.75	D.gunungcola	Dgun	10.7	Male	5	0.00313512	0.00137494	0	0	0.00248811	0.00428996	0.000841498	0	0.00202667	0.0047472	0	0	0	0.00107074	0	0.0780775	0.00113189	0.00583374	0	0.00979901	0	0	0	0	0	0	0	0	0	0	0	0	0	0	0	0	0	0	0	0	0	0	0	0
3.31	D.immigrans	Dimm	18	Female	1	0	0	0	0	0	0	0	0	0	0.00951931	0.00770516	0.000744777	0	0	0	0	0	0	0	0	0	0	0	0	0.000628594	0	0	0	0.00355212	0	0	0	0	0	0	0	0	0.00159158	0	0.0123422	0	0.0801241	0	0.0219138
2.9	D.immigrans	Dimm	15.56	Female	2	0	0	0	0	0	0	0	0	0	0.00936506	0.00850295	0.000749217	0	0	0	0	0	0	0	0	0	0	0	0	0.000592688	0	0	0	0.00305119	0	0	0	0	0	0	0	0	0.00149914	0	0.00967415	0	0.06303	0	0.0146622
2.9	D.immigrans	Dimm	16.6	Female	3	0	0	0	0	0	0	0	0	0	0.00881615	0.0125477	0.00119586	0	0	0	0	0	0	0	0	0	0	0	0	0.000795449	0	0	0	0.00593519	0	0	0	0	0	0	0	0	0.00398594	0	0.0207283	0	0.131912	0	0.0223382
3.18	D.immigrans	Dimm	15.4	Female	4	0	0	0	0	0	0	0	0	0	0.00743231	0.00898702	0.000748945	0	0	0	0	0	0	0	0	0	0	0	0	0.000739633	0	0	0	0.00392603	0	0	0	0	0	0	0	0	0.00223567	0	0.0117194	0	0.0830566	0	0.0169106
3.11	D.immigrans	Dimm	13.6	Female	5	0	0	0	0	0	0	0	0	0	0.0127064	0.0112259	0.00100092	0	0	0	0	0	0	0	0	0	0	0	0	0.000618114	0	0	0	0.00413133	0	0	0	0	0	0	0	0	0.00263136	0	0.0178676	0	0.129747	0	0.0274246
2.08	D.immigrans	Dimm	12	Male	1	0	0	0	0	0	0	0	0	0	0.0112635	0.0133702	0.00154678	0	0	0	0	0	0	0	0	0	0	0	0	0.000967692	0	0	0	0.00355476	0	0	0	0	0	0	0	0	0.00270489	0	0.022146	0	0.176864	0	0.0441316
2.06	D.immigrans	Dimm	11.4	Male	2	0	0	0	0	0	0	0	0	0	0.0155669	0.0168956	0.00132854	0	0	0	0	0	0	0	0	0	0	0	0	0.000889259	0	0	0	0.00382464	0	0	0	0	0	0	0	0	0.0033767	0	0.0223407	0	0.188407	0	0.0407961
1.98	D.immigrans	Dimm	13.5	Male	3	0	0	0	0	0	0	0	0	0	0.0120104	0.0203811	0.00230019	0	0	0	0	0	0	0	0	0	0	0	0	0.00135923	0	0	0	0.00581571	0	0	0	0	0	0	0	0	0.00384894	0	0.0276857	0	0.179491	0	0.0299385
2.16	D.immigrans	Dimm	12.8	Male	4	0	0	0	0	0	0	0	0	0	0.00685774	0.00972922	0.00141212	0	0	0	0	0	0	0	0	0	0	0	0	0.000753857	0	0	0	0.00420873	0	0	0	0	0	0	0	0	0.00222584	0	0.0159219	0	0.0928166	0	0.0202643
2.11	D.immigrans	Dimm	12.5	Male	5	0	0	0	0	0	0	0	0	0	0.00867308	0.0134497	0.00186143	0	0	0	0	0	0	0	0	0	0	0	0	0.0011683	0	0	0	0.00407868	0	0	0	0	0	0	0	0	0.00266643	0	0.0263158	0	0.145856	0	0.0344951
1	D.kikkawai	Dkik	6.23	Female	1	0.000783779	0.00152352	0.0197351	0.000646793	0.00112327	0	0.00115249	0	0	0.00269764	0	0	0	0	0	0.00909467	0.0027327	0.00736464	0.00308	0	0	0	0	0	0	0	0	0	0	0	0	0	0	0	0	0	0	0	0	0	0	0	0	0
0.76	D.kikkawai	Dkik	7	Female	2	0.00105665	0.00187333	0.0238198	0.000723387	0.00121576	0	0.00140811	0	0	0.00298992	0	0	0	0	0	0.0117964	0.00331907	0.0090586	0.00413158	0	0	0	0	0	0	0	0	0	0	0	0	0	0	0	0	0	0	0	0	0	0	0	0	0
0.85	D.kikkawai	Dkik	7.25	Female	3	0.0010657	0.00203502	0.0276667	0.000903608	0.00138544	0	0.00161413	0	0	0.00531808	0	0	0	0	0	0.0113424	0.00403295	0.0100071	0.00397647	0	0	0	0	0	0	0	0	0	0	0	0	0	0	0	0	0	0	0	0	0	0	0	0	0
0.74	D.kikkawai	Dkik	6.55	Female	4	0.000954982	0.0020768	0.0253477	0.000764789	0.00130983	0	0.0016872	0	0	0.00410525	0	0	0	0	0	0.0113671	0.00364914	0.00989101	0.00398649	0	0	0	0	0	0	0	0	0	0	0	0	0	0	0	0	0	0	0	0	0	0	0	0	0
0.88	D.kikkawai	Dkik	6.67	Female	5	0.00135789	0.00244949	0.028668	0.00091874	0.00180143	0	0.00162146	0	0	0.00436351	0	0	0	0	0	0.0134394	0.00344528	0.0097277	0.00378409	0	0	0	0	0	0	0	0	0	0	0	0	0	0	0	0	0	0	0	0	0	0	0	0	0
0.98	D.kikkawai	Dkik	7.3	Female	6	0.00108166	0.0022267	0.0247596	0.000791992	0.00221844	0	0.00169401	0	0	0.00363306	0	0	0	0	0	0.0117159	0.00283797	0.00851323	0.00314286	0	0	0	0	0	0	0	0	0	0	0	0	0	0	0	0	0	0	0	0	0	0	0	0	0
0.69	D.kikkawai	Dkik	4.44	Male	1	0.00124764	0.00171627	0.02608	0.000949099	0.00157541	0	0.00149131	0	0	0.00401529	0	0	0	0	0	0.00973182	0.00384326	0.00865162	0.00449275	0.00117414	0	0	0	0	0	0	0	0	0	0	0	0	0	0	0	0	0	0	0	0	0	0	0	0
0.61	D.kikkawai	Dkik	4.83	Male	2	0.00147446	0.00189773	0.0291232	0.00106032	0.00173748	0	0.00224919	0	0	0.00410363	0	0	0	0	0	0.0117978	0.00106032	0.009118	0.00455738	0.00119531	0	0	0	0	0	0	0	0	0	0	0	0	0	0	0	0	0	0	0	0	0	0	0	0
0.62	D.kikkawai	Dkik	4.4	Male	3	0.00137814	0.00206027	0.0308103	0.00103017	0.00226466	0	0.0022793	0	0	0.00589937	0	0	0	0	0	0.0149123	0.00103017	0.00857645	0.00506452	0.00154937	0	0	0	0	0	0	0	0	0	0	0	0	0	0	0	0	0	0	0	0	0	0	0	0
0.6	D.kikkawai	Dkik	5.17	Male	4	0.00138125	0.00197371	0.0301238	0.00097019	0.00147958	0	0.00221808	0	0	0.00342268	0	0	0	0	0	0.0129051	0.00097019	0.00957192	0.00658333	0.00138884	0	0	0	0	0	0	0	0	0	0	0	0	0	0	0	0	0	0	0	0	0	0	0	0
0.68	D.kikkawai	Dkik	3.92	Male	5	0.000670785	0.00105664	0.0181217	0.00189044	0.000759327	0	0.000807063	0	0	0.00418156	0	0	0	0	0	0.0041868	0.00189044	0.00738009	0.00691177	0	0	0	0	0	0	0	0	0	0	0	0	0	0	0	0	0	0	0	0	0	0	0	0	0
0.76	D.kikkawai	Dkik	5	Male	6	0.00147085	0.00192585	0.023659	0.000648921	0.00143031	0	0.00169696	0	0	0.00294195	0	0	0	0	0	0.0118815	0.00306376	0.00790244	0.00448684	0.00079188	0	0	0	0	0	0	0	0	0	0	0	0	0	0	0	0	0	0	0	0	0	0	0	0
2.04	D.lacicola	Dlac	23	Female	1	0	0	0	0	0	0	0	0	0.00183823	0.0225816	0.0108516	0.000512049	0	0	0	0	0	0.00929398	0.00181372	0.0335408	0	0.00152669	0	0	0	0	0	0	0	0	0	0	0	0.0850095	0	0.0406087	0.00199175	0.00155447	0	0.00104216	0	0	0	0
2.12	D.lacicola	Dlac	24	Female	2	0	0	0	0	0	0	0	0	0.00200472	0.0228414	0.00959373	0.00063069	0	0	0	0	0	0.00672134	0.00185849	0.0315545	0	0.00119727	0	0	0	0	0	0	0	0	0	0	0	0.0827515	0	0.0446291	0.00269121	0.00226784	0	0.00208433	0	0	0	0
2.22	D.lacicola	Dlac	24.9	Female	3	0	0	0	0	0	0	0	0	0.00155856	0.0201321	0.0080813	0.00246559	0	0	0	0	0	0.00668789	0.00180631	0.0269426	0	0.000902311	0	0	0	0	0	0	0	0	0	0	0	0.0792846	0	0.0372234	0.00099139	0.00184314	0	0.00133322	0	0	0	0
2.41	D.lacicola	Dlac	23	Female	4	0	0	0	0	0	0	0	0	0.00143154	0.0183685	0.00737402	0.00241857	0	0	0	0	0	0.00581482	0.00178008	0.0263504	0	0.00100196	0	0	0	0	0	0	0	0	0	0	0	0.0722368	0	0.0365375	0.00072356	0.00146438	0	0.00145297	0	0	0	0
2.02	D.lacicola	Dlac	22	Female	5	0	0	0	0	0	0	0	0	0.00127723	0.0182393	0.00729845	0.00131348	0	0	0	0	0	0.0060944	0.00190099	0.0261553	0	0.0010324	0	0	0	0	0	0	0	0	0	0	0	0.0782194	0	0.0388033	0.000729159	0.00134198	0	0.00119694	0	0	0	0
1.81	D.lacicola	Dlac	17.9	Male	1	0	0	0	0	0	0	0	0	0.00287293	0.0284386	0.00839154	0.00282787	0	0	0	0	0	0.00494471	0.00223204	0.0286975	0	0.0020618	0	0	0	0	0	0	0	0	0	0	0	0.11511	0	0.0569042	0.000935353	0.00183677	0	0.00237222	0	0	0	0
1.81	D.lacicola	Dlac	20.1	Male	2	0	0	0	0	0	0	0	0	0.0041105	0.0282708	0.0074148	0.00234309	0	0	0	0	0	0.00823786	0.00304972	0.0313703	0	0.00212244	0	0	0	0	0	0	0	0	0	0	0	0.112744	0	0.0458144	0.000682808	0.00118684	0	0.00103641	0	0	0	0
1.85	D.lacicola	Dlac	19.6	Male	3	0	0	0	0	0	0	0	0	0.0018973	0.0232258	0.00653983	0.00297	0	0	0	0	0	0.00315828	0.00182162	0.0276641	0	0.00142392	0	0	0	0	0	0	0	0	0	0	0	0.0945785	0	0.052381	0.000970037	0.00141	0	0.00173506	0	0	0	0
1.63	D.lacicola	Dlac	17.8	Male	4	0	0	0	0	0	0	0	0	0.00248466	0.027874	0.00917675	0.00293508	0	0	0	0	0	0.0056686	0.00260123	0.0326689	0	0.00245783	0	0	0	0	0	0	0	0	0	0	0	0.116532	0	0.0613615	0.000976325	0.00160031	0	0.00158562	0	0	0	0
1.68	D.lacicola	Dlac	19.3	Male	5	0	0	0	0	0	0	0	0	0.00118452	0.0174461	0.00301058	0.000472548	0	0	0	0	0	0.00281465	0	0.0178978	0	0.000816671	0	0	0	0	0	0	0	0	0	0	0	0.097439	0	0.04027	0.000372861	0.000761117	0	0.000868469	0	0	0	0
2.37	D.littoralis	Dlit	23.7	Female	1	0	0	0	0	0	0	0	0	0.00186076	0.0190784	0.00808227	0.000476011	0	0	0	0	0	0	0	0.0161982	0.00133821	0.000989929	0.000578617	0	0.00108785	0	0	0	0	0	0	0	0	0.0138151	0.000317888	0.0327834	0	0.00265447	0	0.00415106	0	0	0	0
2.2	D.littoralis	Dlit	19.5	Female	2	0	0	0	0	0	0	0	0	0.00146818	0.0163217	0.00684106	0.000579267	0	0	0	0	0	0	0	0.0129993	0.00121515	0.000698476	0.000707977	0	0.00112051	0	0	0	0	0	0	0	0	0.0109897	0.000314835	0.026143	0	0.00346405	0	0.00354335	0	0	0	0
2.12	D.littoralis	Dlit	21.9	Female	3	0	0	0	0	0	0	0	0	0.00112736	0.0127476	0.00522108	0.000394181	0	0	0	0	0	0	0	0.0106947	0.00106613	0.000660117	0.000511091	0	0.00103478	0	0	0	0	0	0	0	0	0.00978299	0.000292325	0.0172472	0	0.00190595	0	0.00410966	0	0	0	0
2.12	D.littoralis	Dlit	24.1	Female	4	0	0	0	0	0	0	0	0	0.00148113	0.0157225	0.00714272	0.00073909	0	0	0	0	0	0	0	0.0128347	0.00145589	0.000666588	0.000423247	0	0.00132281	0	0	0	0	0	0	0	0	0.0104272	0.000361107	0.0213632	0	0.00258148	0	0.00578105	0	0	0	0
2.04	D.littoralis	Dlit	17.3	Female	5	0	0	0	0	0	0	0	0	0.00154412	0.0142542	0.00559915	0.000327712	0	0	0	0	0	0	0	0.0125835	0.00126876	0.000679278	0.000464742	0	0.00097558	0	0	0	0	0	0	0	0	0.0103652	0.000321658	0.0188516	0	0.00263257	0	0.00406648	0	0	0	0
2.3	D.littoralis	Dlit	18.5	Male	1	0	0	0	0	0	0	0	0	0.00157391	0.0140694	0.00434459	0	0	0	0	0	0	0	0	0.0138884	0.00125742	0.00132428	0.000750804	0	0.000737469	0	0	0	0	0	0	0	0	0.00962624	0.000311713	0.0280009	0	0.00115045	0	0.00603548	0	0	0	0
2.04	D.littoralis	Dlit	16.4	Male	2	0	0	0	0	0	0	0	0	0.00197549	0.0170538	0.0058629	0	0	0	0	0	0	0	0	0.0158457	0.00251966	0.00149307	0.000821598	0	0.00113079	0	0	0	0	0	0	0	0	0.0120388	0.00056588	0.0339168	0	0.000620824	0	0.00629385	0	0	0	0
1.75	D.littoralis	Dlit	22.9	Male	3	0	0	0	0	0	0	0	0	0.00204571	0.0163247	0.00394432	0	0	0	0	0	0	0	0	0.0153632	0.00140263	0.00104272	0.000948074	0	0.0852936	0	0	0	0	0	0	0	0	0.0120498	0.000458286	0.0300666	0	0	0	0.00550262	0	0	0	0
1.94	D.littoralis	Dlit	18.33	Male	4	0	0	0	0	0	0	0	0	0.00298969	0.0250171	0.00965974	0	0	0	0	0	0	0	0	0.0251219	0.000801751	0.00165489	0.00109957	0	0.00213334	0	0	0	0	0	0	0	0	0.0168235	0.000375821	0.0491447	0	0.0022266	0	0.0117754	0	0	0	0
1.92	D.littoralis	Dlit	20.6	Male	5	0	0	0	0	0	0	0	0	0.00123958	0.014297	0.00470803	0	0	0	0	0	0	0	0	0.0134664	0.00154426	0.000964692	0.000511424	0	0.00120146	0	0	0	0	0	0	0	0	0.0105971	0.000424038	0.0215377	0	0.000636067	0	0.00657865	0	0	0	0
2.37	D.lummei	Dlum	25.5	Female	1	0	0	0	0	0	0	0	0	0.000978903	0.0079831	0.00426168	0	0	0	0	0	0	0.0116119	0	0.024876	0	0.00667478	0	0	0	0	0	0	0	0	0	0.00610789	0	0.0040581	0	0	0	0	0	0	0	0	0	0
2.13	D.lummei	Dlum	16	Female	2	0	0	0	0	0	0	0	0	0.00158216	0.00920778	0.00539865	0	0	0	0	0	0	0.0241011	0	0.0309608	0	0.00888906	0	0	0	0	0	0	0	0	0	0.00551599	0	0.00238536	0	0	0	0	0	0	0	0	0	0
2	D.lummei	Dlum	23.6	Female	3	0	0	0	0	0	0	0	0	0.000665	0.00724231	0.00419688	0	0	0	0	0	0	0.00863741	0	0.0268508	0	0.0181585	0	0	0	0	0	0	0	0	0	0.00436626	0	0.00477991	0	0	0	0	0	0	0	0	0	0
1.97	D.lummei	Dlum	33.1	Female	4	0	0	0	0	0	0	0	0	0.00105584	0.00751298	0.00486947	0	0	0	0	0	0	0.0179563	0	0.0315661	0	0.010586	0	0	0	0	0	0	0	0	0	0.0067411	0	0.00367184	0	0	0	0	0	0	0	0	0	0
1.87	D.lummei	Dlum	22.56	Female	5	0	0	0	0	0	0	0	0	0.00137433	0.0130288	0.00986514	0	0	0	0	0	0	0.0207719	0	0.0420674	0	0.0251584	0	0	0	0	0	0	0	0	0	0.0087147	0	0.00571874	0	0	0	0	0	0	0	0	0	0
2.26	D.lummei	Dlum	18.18	Female	6	0	0	0	0	0	0	0	0	0.00171239	0.0143076	0.00279302	0	0	0	0	0	0	0.0140569	0	0.0418853	0	0.0295224	0	0	0	0	0	0	0	0	0	0.00697435	0	0.00701587	0	0	0	0	0	0	0	0	0	0
2.34	D.lummei	Dlum	20.17	Male	1	0	0	0	0	0	0	0	0	0.00124786	0.0093681	0.00331771	0	0	0	0	0	0	0.0167585	0	0.0146154	0	0.00471994	0	0	0	0	0	0	0	0	0	0.00659268	0	0.00776521	0	0	0	0	0	0	0	0	0	0
2.49	D.lummei	Dlum	16.5	Male	2	0	0	0	0	0	0	0	0	0.00064257	0.00823767	0.00367351	0	0	0	0	0	0	0.00451113	0	0.0133724	0	0.013968	0	0	0	0	0	0	0	0	0	0.00293587	0	0.00647008	0	0	0	0	0	0	0	0	0	0
2	D.lummei	Dlum	26.8	Male	3	0	0	0	0	0	0	0	0	0.0018	0.011544	0.00367419	0	0	0	0	0	0	0.0225515	0	0.0157633	0	0.00774498	0	0	0	0	0	0	0	0	0	0.00811654	0	0.00884226	0	0	0	0	0	0	0	0	0	0
2.36	D.lummei	Dlum	19.1	Male	4	0	0	0	0	0	0	0	0	0.0015	0.0112608	0.00420808	0	0	0	0	0	0	0.0224355	0	0.019685	0	0.00934825	0	0	0	0	0	0	0	0	0	0.00830247	0	0.0103133	0	0	0	0	0	0	0	0	0	0
1.89	D.lummei	Dlum	13.38	Male	5	0	0	0	0	0	0	0	0	0.00178307	0.0146076	0.00714974	0	0	0	0	0	0	0.0198811	0	0.0326817	0	0.0193025	0	0	0	0	0	0	0	0	0	0.00750573	0	0.00511934	0	0	0	0	0	0	0	0	0	0
2.02	D.lummei	Dlum	24.4	Male	6	0	0	0	0	0	0	0	0	0.00199505	0.0164768	0.00828781	0	0	0	0	0	0	0.0137001	0	0.0347381	0	0.0266658	0	0	0	0	0	0	0	0	0	0.00674913	0	0.00657749	0	0	0	0	0	0	0	0	0	0
0.78	D.mauritiana	Dmau	3.1	Female	1	0.00181613	0.00411374	0	0	0	0.00129536	0	0	0.00176923	0.00711799	0	0	0	0	0.00123165	0.211151	0.00352005	0.00849421	0	0	0	0	0	0	0	0	0	0	0	0	0	0	0	0	0	0	0	0	0	0	0	0	0	0
0.77	D.mauritiana	Dmau	3.2	Female	2	0.00252972	0.0042527	0	0	0	0.000919878	0	0	0.00316104	0.0149117	0	0	0	0	0.00300765	0.180658	0.00415481	0.00906923	0	0	0	0	0	0	0	0	0	0	0	0	0	0	0	0	0	0	0	0	0	0	0	0	0	0
0.82	D.mauritiana	Dmau	4.5	Female	3	0.00302261	0.0059341	0	0	0	0.00272263	0	0	0.00431707	0.01862	0	0	0	0	0.00231393	0.218154	0.00529266	0.0151036	0	0	0	0	0	0	0	0	0	0	0	0	0	0	0	0	0	0	0	0	0	0	0	0	0	0
0.81	D.mauritiana	Dmau	5.1	Female	4	0.00239211	0.00459053	0	0	0	0.00240903	0	0	0.00239136	0.0110024	0	0	0	0	0.0020041	0.193489	0.00448663	0.0132782	0	0	0	0	0	0	0	0	0	0	0	0	0	0	0	0	0	0	0	0	0	0	0	0	0	0
0.84	D.mauritiana	Dmau	5.3	Female	5	0.00261795	0.00509425	0	0	0	0.00205156	0	0	0.00279643	0.0107266	0	0	0	0	0.00190876	0.190243	0.00375371	0.00988362	0	0	0	0	0	0	0	0	0	0	0	0	0	0	0	0	0	0	0	0	0	0	0	0	0	0
0.8	D.mauritiana	Dmau	5.22	Female	6	0.0027633	0.00522755	0	0	0	0.00229737	0	0	0.00401125	0.0189215	0	0	0	0	0.00235265	0.217899	0.00458112	0.0144055	0	0	0	0	0	0	0	0	0	0	0	0	0	0	0	0	0	0	0	0	0	0	0	0	0	0
0.73	D.mauritiana	Dmau	3	Male	1	0.00211038	0.00298107	0	0	0	0	0	0.00511343	0.0149205	0.0128107	0	0	0	0	0.00206332	0.219738	0	0.0103579	0	0	0	0	0	0	0	0	0	0	0	0	0	0	0	0	0	0	0	0	0	0	0	0	0	0
0.72	D.mauritiana	Dmau	2.8	Male	2	0.00172656	0.00363325	0	0	0	0	0	0.0076919	0.0215625	0.0218576	0	0	0	0	0.00234978	0.230682	0	0.016922	0	0	0	0	0	0	0	0	0	0	0	0	0	0	0	0	0	0	0	0	0	0	0	0	0	0
0.7	D.mauritiana	Dmau	2.6	Male	3	0.00127571	0.00281324	0	0	0	0	0	0.00311847	0.0112	0.0165261	0	0	0	0	0.00115001	0.151882	0	0.0121903	0	0	0	0	0	0	0	0	0	0	0	0	0	0	0	0	0	0	0	0	0	0	0	0	0	0
0.69	D.mauritiana	Dmau	2.88	Male	4	0.0028314	0.00556919	0	0	0	0	0	0.00513568	0.0156101	0.021362	0	0	0	0	0.00337468	0.272401	0	0.0188919	0	0	0	0	0	0	0	0	0	0	0	0	0	0	0	0	0	0	0	0	0	0	0	0	0	0
0.72	D.mauritiana	Dmau	2.67	Male	5	0.00185238	0.00351867	0	0	0	0	0	0.00633992	0.0175194	0.0170932	0	0	0	0	0.00245605	0.199153	0	0.0128758	0	0	0	0	0	0	0	0	0	0	0	0	0	0	0	0	0	0	0	0	0	0	0	0	0	0
0.72	D.mauritiana	Dmau	2.56	Male	6	0.00141159	0.00250502	0	0	0	0	0	0.00633655	0.0186042	0.020661	0	0	0	0	0.00201806	0.175723	0	0.00997079	0	0	0	0	0	0	0	0	0	0	0	0	0	0	0	0	0	0	0	0	0	0	0	0	0	0
1.24	D.melanogaster	Dmel	8.5	Female	1	0	0.000810157	0	0	0	0	0	0.00072373	0.00654839	0.00498801	0	0	0	0	0	0.0157009	0.00108234	0.0172114	0	0.00705618	0	0	0	0	0	0	0	0	0	0	0	0.00100814	0	0.0313235	0	0.0204805	0	0	0	0	0	0	0	0
0.74	D.melanogaster	Dmel	6.1	Female	2	0	0.000710247	0	0	0	0	0	0.00125644	0.0129459	0.00551745	0	0	0	0	0	0.013009	0.00208678	0.0254132	0	0.00353465	0	0	0	0	0	0	0	0	0	0	0	0.00112621	0	0.0420717	0	0.0302398	0	0	0	0	0	0	0	0
1.26	D.melanogaster	Dmel	9.5	Female	3	0	0.000364328	0	0	0	0	0	0.00109082	0.0104127	0.00474488	0	0	0	0	0	0.00937483	0.00108441	0.0169814	0	0.00205754	0	0	0	0	0	0	0	0	0	0	0	0.000984947	0	0.0265826	0	0.0182172	0	0	0	0	0	0	0	0
1.23	D.melanogaster	Dmel	7.9	Female	4	0	0.000594979	0	0	0	0	0	0.000538994	0.00639837	0.00334908	0	0	0	0	0	0.0115557	0.00141322	0.0198922	0	0.00277579	0	0	0	0	0	0	0	0	0	0	0	0.00110471	0	0.0303925	0	0.0266036	0	0	0	0	0	0	0	0
1.16	D.melanogaster	Dmel	9.75	Female	5	0	0.0004875	0	0	0	0	0	0.000348488	0.00432759	0.00386544	0	0	0	0	0	0.0110693	0.00154729	0.0191403	0	0.00824122	0	0	0	0	0	0	0	0	0	0	0	0.000726253	0	0.030291	0	0.0215145	0	0	0	0	0	0	0	0
1.23	D.melanogaster	Dmel	8.9	Female	6	0	0.000421894	0	0	0	0	0	0.000492983	0.00665854	0.00350715	0	0	0	0	0	0.0109712	0.00130805	0.0183235	0	0.00266288	0	0	0	0	0	0	0	0	0	0	0	0.000780663	0	0.0275321	0	0.0198662	0	0	0	0	0	0	0	0
0.84	D.melanogaster	Dmel	5.78	Male	1	0.00138431	0.00153651	0	0	0	0	0	0.00318584	0.00553571	0.00189506	0	0	0	0	0.000704895	0.089543	0.00154961	0.0205006	0	0	0	0	0	0	0	0	0	0	0	0	0	0	0	0	0	0	0	0	0	0	0	0	0	0
0.78	D.melanogaster	Dmel	6.4	Male	2	0.000881299	0.001015	0	0	0	0	0	0.00240474	0.00516667	0.0033962	0	0	0	0	0.000520294	0.0705765	0.000756665	0.0163172	0	0	0	0	0	0	0	0	0	0	0	0	0	0	0	0	0	0	0	0	0	0	0	0	0	0
0.83	D.melanogaster	Dmel	4.9	Male	3	0.00125392	0.00136265	0	0	0	0	0	0.00311708	0.00459036	0.00190325	0	0	0	0	0.000857669	0.0787289	0.00212351	0.0165784	0	0	0	0	0	0	0	0	0	0	0	0	0	0	0	0	0	0	0	0	0	0	0	0	0	0
0.78	D.melanogaster	Dmel	5.8	Male	4	0.000914245	0.000980883	0	0	0	0	0	0.00241511	0.00561538	0.00272631	0	0	0	0	0.000682353	0.0798122	0	0.0269088	0	0	0	0	0	0	0	0	0	0	0	0	0	0	0	0	0	0	0	0	0	0	0	0	0	0
0.82	D.melanogaster	Dmel	4.1	Male	5	0.000767797	0.000754541	0	0	0	0	0	0.00211983	0.00595122	0.00345281	0	0	0	0	0.000600388	0.0676511	0	0.0177638	0	0	0	0	0	0	0	0	0	0	0	0	0	0	0	0	0	0	0	0	0	0	0	0	0	0
0.8	D.melanogaster	Dmel	4.78	Male	6	0.00146156	0.00192104	0	0	0	0	0	0.00250632	0.00635	0.00267334	0	0	0	0	0.000972993	0.0951435	0.00112178	0.0245149	0	0	0	0	0	0	0	0	0	0	0	0	0	0	0	0	0	0	0	0	0	0	0	0	0	0
2.41	D.mercatorum	Dmer	17.27	Female	1	0	0	0	0	0	0	0	0	0	0.0155096	0.0199086	0.000702166	0	0	0	0	0	0	0	0	0	0	0	0	0.00217711	0	0.00444541	0	0.00271594	0	0	0	0	0	0	0	0	0.0574715	0.00212807	0.130491	0	0.0209731	0	0
2.58	D.mercatorum	Dmer	18.82	Female	2	0	0	0	0	0	0	0	0	0	0.0113885	0.014384	0.000510144	0	0	0	0	0	0	0	0	0	0	0	0	0.00158661	0	0.00248826	0	0.00258397	0	0	0	0	0	0	0	0	0.0402238	0.0016716	0.0594114	0	0.0143293	0	0
2.42	D.mercatorum	Dmer	19.45	Female	3	0	0	0	0	0	0	0	0	0	0.0146823	0.0197691	0.000768328	0	0	0	0	0	0	0	0	0	0	0	0	0.00232699	0	0.00458207	0	0.00370647	0	0	0	0	0	0	0	0	0.0586289	0.00208316	0.132501	0	0.0232906	0	0
2.49	D.mercatorum	Dmer	16.9	Female	4	0	0	0	0	0	0	0	0	0	0.0116635	0.0155584	0.000553754	0	0	0	0	0	0	0	0	0	0	0	0	0.00148955	0	0.00299674	0	0.00287208	0	0	0	0	0	0	0	0	0.0446972	0.00197778	0.10353	0	0.0170378	0	0
2.54	D.mercatorum	Dmer	24.4	Female	5	0	0	0	0	0	0	0	0	0	0.0139169	0.0174734	0.000641554	0	0	0	0	0	0	0	0	0	0	0	0	0.00226157	0	0.00411942	0	0.00329275	0	0	0	0	0	0	0	0	0.0486904	0.00156026	0.112833	0	0.0132665	0	0
1.89	D.mercatorum	Dmer	21.3	Male	1	0	0	0	0	0	0	0	0	0	0.0218792	0.0115258	0	0	0	0	0	0	0	0	0	0	0.00907412	0	0	0.000741891	0	0.00101459	0	0	0	0	0	0	0	0	0.0357956	0.0134723	0.0232191	0	0.0344961	0	0.00885037	0	0
1.94	D.mercatorum	Dmer	22.22	Male	2	0	0	0	0	0	0	0	0	0	0.0256623	0.0124095	0	0	0	0	0	0	0	0	0	0	0.00838056	0	0	0.000827689	0	0.00122481	0	0	0	0	0	0	0	0	0.0357995	0.0128894	0.0222252	0	0.0332847	0	0.00962195	0	0
2	D.mercatorum	Dmer	20.4	Male	3	0	0	0	0	0	0	0	0	0	0.0228084	0.0147736	0	0	0	0	0	0	0	0	0	0	0.00710014	0	0	0.00111948	0	0.0015424	0	0	0	0	0	0	0	0	0.0237014	0.0103526	0.0302023	0	0.0498362	0	0.0122424	0	0
1.96	D.mercatorum	Dmer	22.1	Male	4	0	0	0	0	0	0	0	0	0	0.0218976	0.0130515	0	0	0	0	0	0	0	0	0	0	0.00571903	0	0	0.0010154	0	0.00114851	0	0	0	0	0	0	0	0	0.0210001	0.0109612	0.0276873	0	0.0420693	0	0.0124922	0	0
1.93	D.mercatorum	Dmer	25.7	Male	5	0	0	0	0	0	0	0	0	0	0.0272497	0.0141146	0	0	0	0	0	0	0	0	0	0	0.010187	0	0	0.000960875	0	0.00125275	0	0	0	0	0	0	0	0	0.0522429	0.0136053	0.024063	0	0.0366971	0	0.00979741	0	0
1.27	D.mojavensis	Dmoj	43.11	Female	1	0	0	0	0	0	0	0	0	0	0.00168399	0.011887	0.00100346	0	0	0	0	0	0	0	0	0	0	0	0	0.000730114	0	0.00239615	0	0	0	0	0	0	0	0	0	0	0	0	0.0322004	0	0.0325458	0	0
1.39	D.mojavensis	Dmoj	38.6	Female	2	0	0	0	0	0	0	0	0	0	0.00161729	0.0142893	0.00166832	0	0	0	0	0	0	0	0	0	0	0	0	0.00126908	0	0.00473847	0	0	0	0	0	0	0	0	0	0	0	0	0.0666084	0	0.0709829	0	0
1.2	D.mojavensis	Dmoj	40.44	Female	3	0	0	0	0	0	0	0	0	0	0.00161008	0.0128366	0.00135796	0	0	0	0	0	0	0	0	0	0	0	0	0.00141348	0	0.00434235	0	0	0	0	0	0	0	0	0	0	0	0	0.0520387	0	0.0354544	0	0
1.15	D.mojavensis	Dmoj	41.8	Female	4	0	0	0	0	0	0	0	0	0	0.00134195	0.0110553	0.00134433	0	0	0	0	0	0	0	0	0	0	0	0	0.000983292	0	0.00362491	0	0	0	0	0	0	0	0	0	0	0	0	0.0379528	0	0.033623	0	0
1.13	D.mojavensis	Dmoj	47.3	Female	5	0	0	0	0	0	0	0	0	0	0.00130118	0.0108428	0.00122022	0	0	0	0	0	0	0	0	0	0	0	0	0.000800556	0	0.00250119	0	0	0	0	0	0	0	0	0	0	0	0	0.0348027	0	0.0370071	0	0
1.34	D.mojavensis	Dmoj	43.56	Female	6	0	0	0	0	0	0	0	0	0	0.00105192	0.00938452	0.00102899	0	0	0	0	0	0	0	0	0	0	0	0	0.000708851	0	0.00236431	0	0	0	0	0	0	0	0	0	0	0	0	0.027314	0	0.0336498	0	0
1.08	D.mojavensis	Dmoj	56.6	Male	1	0	0	0	0	0	0	0	0	0	0.00180023	0.0176507	0.00133474	0	0	0	0	0	0	0	0	0	0	0	0	0.00117267	0	0.00521081	0	0	0	0	0	0	0	0	0	0	0	0	0.0376337	0	0.052525	0	0
1.09	D.mojavensis	Dmoj	64.4	Male	2	0	0	0	0	0	0	0	0	0	0.00160534	0.0139205	0.0015525	0	0	0	0	0	0	0	0	0	0	0	0	0.00132789	0	0.00405392	0	0	0	0	0	0	0	0	0	0	0	0	0.0739649	0	0.0396996	0	0
1.08	D.mojavensis	Dmoj	55.1	Male	3	0	0	0	0	0	0	0	0	0	0.00193524	0.0145191	0.00170228	0	0	0	0	0	0	0	0	0	0	0	0	0.00125643	0	0.00482483	0	0	0	0	0	0	0	0	0	0	0	0	0.0980019	0	0.0470256	0	0
1.13	D.mojavensis	Dmoj	52.4	Male	4	0	0	0	0	0	0	0	0	0	0.00169906	0.0119176	0.00116475	0	0	0	0	0	0	0	0	0	0	0	0	0.0010007	0	0.00394731	0	0	0	0	0	0	0	0	0	0	0	0	0.0903085	0	0.0476265	0	0
0.97	D.mojavensis	Dmoj	63.1	Male	5	0	0	0	0	0	0	0	0	0	0.00162856	0.012774	0.00157226	0	0	0	0	0	0	0	0	0	0	0	0	0.000979237	0	0.00395377	0	0	0	0	0	0	0	0	0	0	0	0	0.0736605	0	0.056857	0	0
1.06	D.mojavensis	Dmoj	57.88	Male	6	0	0	0	0	0	0	0	0	0	0.00176541	0.0134443	0.00143876	0	0	0	0	0	0	0	0	0	0	0	0	0.00123746	0	0.00381471	0	0	0	0	0	0	0	0	0	0	0	0	0.0620972	0	0.0433388	0	0
2.2	D.mulleri	Dmul	37.44	Female	1	0	0	0	0	0	0	0	0	0	0.000657287	0.0205581	0.000978107	0	0	0	0	0	0	0	0	0	0	0	0	0.000729871	0	0.00286121	0	0	0	0	0	0	0	0	0	0	0	0	0.0100237	0	0.0737737	0	0.0479774
2.35	D.mulleri	Dmul	47.7	Female	2	0	0	0	0	0	0	0	0	0	0.000305081	0.0167012	0.000497843	0	0	0	0	0	0	0	0	0	0	0	0	0.000789144	0	0.000957903	0	0	0	0	0	0	0	0	0	0	0	0	0.00532168	0	0.0472983	0	0.00500238
2.21	D.mulleri	Dmul	40.44	Female	3	0	0	0	0	0	0	0	0	0	0.000890746	0.0215433	0.00102095	0	0	0	0	0	0	0	0	0	0	0	0	0.000726568	0	0.00132039	0	0	0	0	0	0	0	0	0	0	0	0	0.00613037	0	0.175291	0	0.0253514
2.26	D.mulleri	Dmul	42.4	Female	4	0	0	0	0	0	0	0	0	0	0.000897923	0.0223455	0.00111853	0	0	0	0	0	0	0	0	0	0	0	0	0.00069048	0	0.00274836	0	0	0	0	0	0	0	0	0	0	0	0	0.00638209	0	0.24194	0	0.0234625
2.15	D.mulleri	Dmul	45.6	Female	5	0	0	0	0	0	0	0	0	0	0.000712136	0.0191843	0.000806513	0	0	0	0	0	0	0	0	0	0	0	0	0.000589061	0	0.00126029	0	0	0	0	0	0	0	0	0	0	0	0	0.00529322	0	0.07797	0	0.0134948
1.64	D.mulleri	Dmul	42.4	Male	1	0	0	0	0	0	0	0	0	0	0.000600167	0.0146045	0.00122292	0	0	0	0	0	0	0	0	0	0	0	0	0.00234431	0	0.00800686	0	0.0481151	0	0	0	0	0	0	0	0	0	0	0.00180472	0	0.0957128	0	0.297398
1.66	D.mulleri	Dmul	43.2	Male	2	0	0	0	0	0	0	0	0	0	0.00108339	0.0206149	0.00115785	0	0	0	0	0	0	0	0	0	0	0	0	0.00183923	0	0.0026368	0	0.0556405	0	0	0	0	0	0	0	0	0	0	0.0223249	0	0.0584152	0	0.228271
1.8	D.mulleri	Dmul	42.7	Male	3	0	0	0	0	0	0	0	0	0	0.000654833	0.0217872	0.00121868	0	0	0	0	0	0	0	0	0	0	0	0	0.00131925	0	0.00319597	0	0.0502354	0	0	0	0	0	0	0	0	0	0	0.00287174	0	0.08404	0	0.260958
1.71	D.mulleri	Dmul	40.2	Male	4	0	0	0	0	0	0	0	0	0	0.000575599	0.0213516	0.00114843	0	0	0	0	0	0	0	0	0	0	0	0	0.00138868	0	0.00709402	0	0.0435227	0	0	0	0	0	0	0	0	0	0	0.00463183	0	0.095906	0	0.258895
1.69	D.mulleri	Dmul	48	Male	5	0	0	0	0	0	0	0	0	0	0.00102821	0.0207674	0.00128564	0	0	0	0	0	0	0	0	0	0	0	0	0.00148541	0	0.00831264	0	0.0418144	0	0	0	0	0	0	0	0	0	0	0.00532798	0	0.0964672	0	0.295259
2.27	D.nasuta	Dnas	7.46	Female	1	0	0	0	0	0	0	0	0	0	0.00440025	0.0141135	0.000883522	0	0	0	0	0	0	0	0	0	0	0	0	0.00294901	0	0.0179417	0	0	0	0	0	0	0	0	0	0	0.0341807	0	0.0107797	0	0.0036844	0	0
1.94	D.nasuta	Dnas	7.91	Female	2	0	0	0	0	0	0	0	0	0	0.0029314	0.0112605	0.000635364	0	0	0	0	0	0	0	0	0	0	0	0	0.00229654	0	0.0104861	0	0	0	0	0	0	0	0	0	0	0.0388612	0	0.0134084	0	0.00743514	0	0
2.13	D.nasuta	Dnas	7.1	Female	3	0	0	0	0	0	0	0	0	0	0.00436999	0.0148752	0.000784662	0	0	0	0	0	0	0	0	0	0	0	0	0.0032384	0	0.0288478	0	0	0	0	0	0	0	0	0	0	0.04536	0	0.0136019	0	0.00318678	0	0
2.03	D.nasuta	Dnas	7.1	Female	4	0	0	0	0	0	0	0	0	0	0.00387293	0.0147446	0.000987978	0	0	0	0	0	0	0	0	0	0	0	0	0.0026515	0	0.032651	0	0	0	0	0	0	0	0	0	0	0.0462087	0	0.0155862	0	0.00668753	0	0
2.22	D.nasuta	Dnas	6.9	Female	5	0	0	0	0	0	0	0	0	0	0.00402862	0.0148192	0.000762262	0	0	0	0	0	0	0	0	0	0	0	0	0.00292374	0	0.0238477	0	0	0	0	0	0	0	0	0	0	0.0365172	0	0.0102526	0	0.00698877	0	0
2.55	D.nasuta	Dnas	8	Male	1	0	0	0	0	0	0	0	0	0	0.00365499	0.0157469	0.000794701	0	0	0	0	0	0	0	0	0	0	0	0	0.00234139	0	0.111556	0	0.00594174	0	0	0	0	0	0	0	0	0.00782249	0	0.00364553	0	0.0139274	0	0
1.58	D.nasuta	Dnas	7	Male	2	0	0	0	0	0	0	0	0	0	0.00480678	0.0216295	0.00083302	0	0	0	0	0	0	0	0	0	0	0	0	0.00336373	0	0.185953	0	0.0095128	0	0	0	0	0	0	0	0	0.0143082	0	0.0067015	0	0.0218641	0	0
1.6	D.nasuta	Dnas	7.3	Male	3	0	0	0	0	0	0	0	0	0	0.00460239	0.0208499	0.000705092	0	0	0	0	0	0	0	0	0	0	0	0	0.00343476	0	0.21083	0	0.00954541	0	0	0	0	0	0	0	0	0.0133622	0	0.00622692	0	0.00696966	0	0
1.34	D.nasuta	Dnas	6.5	Male	4	0	0	0	0	0	0	0	0	0	0.00300161	0.0130098	0.00144994	0	0	0	0	0	0	0	0	0	0	0	0	0.00264975	0	0.130441	0	0.00958837	0	0	0	0	0	0	0	0	0.0306119	0	0.00615965	0	0.0070556	0	0
1.58	D.nasuta	Dnas	5.63	Male	5	0	0	0	0	0	0	0	0	0	0.00383004	0.0231376	0.00088591	0	0	0	0	0	0	0	0	0	0	0	0	0.0034353	0	0.160176	0	0.0181817	0	0	0	0	0	0	0	0	0.0133371	0	0.0057253	0	0.00207134	0	0
1.12	D.nebulosa	Dneb	7.91	Female	1	0	0	0	0	0	0	0	0	0	0.000477382	0.0101985	0	0	0	0	0	0	0	0	0	0	0	0	0	0	0	0	0	0	0	0	0	0	0	0	0	0	0	0	0.0477534	0	0.00606058	0	0
1.21	D.nebulosa	Dneb	13.89	Female	2	0	0	0	0	0	0	0	0	0	0.000642726	0.0087284	0	0	0	0	0	0	0	0	0	0	0	0	0	0	0	0	0	0	0	0	0	0	0	0	0	0	0	0	0.0490247	0	0.00631101	0	0
1.14	D.nebulosa	Dneb	11.5	Female	3	0	0	0	0	0	0	0	0	0	0.000575599	0.00868449	0	0	0	0	0	0	0	0	0	0	0	0	0	0	0	0	0	0	0	0	0	0	0	0	0	0	0	0	0.0391268	0	0.00786812	0	0
1.23	D.nebulosa	Dneb	8.18	Female	4	0	0	0	0	0	0	0	0	0	0.000523603	0.0108362	0	0	0	0	0	0	0	0	0	0	0	0	0	0	0	0	0	0	0	0	0	0	0	0	0	0	0	0	0.055887	0	0.00591276	0	0
1.22	D.nebulosa	Dneb	14.5	Female	5	0	0	0	0	0	0	0	0	0	0.000557775	0.00911049	0	0	0	0	0	0	0	0	0	0	0	0	0	0	0	0	0	0	0	0	0	0	0	0	0	0	0	0	0.0445567	0	0.00755088	0	0
1.24	D.nebulosa	Dneb	9.7	Female	6	0	0	0	0	0	0	0	0	0	0.000470382	0.00855443	0	0	0	0	0	0	0	0	0	0	0	0	0	0	0	0	0	0	0	0	0	0	0	0	0	0	0	0	0.0584956	0	0.00703809	0	0
0.83	D.nebulosa	Dneb	12.1	Male	1	0	0	0	0	0	0	0	0	0	0.0013762	0.0168364	0	0	0	0	0	0	0	0.00455422	0	0	0	0	0	0	0	0	0	0	0	0	0	0	0	0	0	0	0	0	0.0256146	0	0	0	0
0.99	D.nebulosa	Dneb	7.31	Male	2	0	0	0	0	0	0	0	0	0	0.00112923	0.0156527	0	0	0	0	0	0	0	0.00363636	0	0	0	0	0	0	0	0	0	0	0	0	0	0	0	0	0	0	0	0	0.0484237	0	0	0	0
0.85	D.nebulosa	Dneb	7.5	Male	3	0	0	0	0	0	0	0	0	0	0.00118656	0.0181765	0	0	0	0	0	0	0	0.00411765	0	0	0	0	0	0	0	0	0	0	0	0	0	0	0	0	0	0	0	0	0.0388911	0	0	0	0
0.92	D.nebulosa	Dneb	8.5	Male	4	0	0	0	0	0	0	0	0	0	0.00184915	0.0201689	0	0	0	0	0	0	0	0.00418478	0	0	0	0	0	0	0	0	0	0	0	0	0	0	0	0	0	0	0	0	0.0389225	0	0	0	0
0.85	D.nebulosa	Dneb	8.3	Male	5	0	0	0	0	0	0	0	0	0	0.00122945	0.0102729	0	0	0	0	0	0	0	0.00549412	0	0	0	0	0	0	0	0	0	0	0	0	0	0	0	0	0	0	0	0	0.041098	0	0	0	0
0.84	D.nebulosa	Dneb	9.5	Male	6	0	0	0	0	0	0	0	0	0	0.00198186	0.0211747	0	0	0	0	0	0	0	0.00505952	0	0	0	0	0	0	0	0	0	0	0	0	0	0	0	0	0	0	0	0	0.0414384	0	0	0	0
1.56	D.novamexicana	Dnov	24.11	Female	1	0	0	0	0	0	0	0	0	0.00286538	0.0170121	0.0144665	0	0	0	0	0.00367308	0	0.00728756	0	0.102278	0	0.0135618	0	0	0	0	0	0	0	0.000350256	0	0.000923284	0	0.0200239	0	0	0	0	0	0	0	0	0	0
1.78	D.novamexicana	Dnov	29.9	Female	2	0	0	0	0	0	0	0	0	0.00148876	0.00868357	0.00717703	0	0	0	0	0.00325545	0	0.0043054	0	0.059071	0	0.00919553	0	0	0	0	0	0	0	0.000181756	0	0.000564893	0	0.0102602	0	0	0	0	0	0	0	0	0	0
1.53	D.novamexicana	Dnov	21.78	Female	3	0	0	0	0	0	0	0	0	0.00115686	0.0071559	0.00536554	0	0	0	0	0.00208635	0	0.00336294	0	0.0610982	0	0.00962198	0	0	0	0	0	0	0	0.000112776	0	0.000503258	0	0.00982624	0	0	0	0	0	0	0	0	0	0
1.94	D.novamexicana	Dnov	27.9	Female	4	0	0	0	0	0	0	0	0	0.000860825	0.00585027	0.00499232	0	0	0	0	0.0019419	0	0.00294639	0	0.0573372	0	0.00925751	0	0	0	0	0	0	0	0.000122295	0	0.000494956	0	0.0100404	0	0	0	0	0	0	0	0	0	0
1.75	D.novamexicana	Dnov	16.8	Female	5	0	0	0	0	0	0	0	0	0.00202857	0.0115474	0.00935567	0	0	0	0	0.00267037	0	0.00508837	0	0.0720012	0	0.00993333	0	0	0	0	0	0	0	0.000205413	0	0.000709162	0	0.0145365	0	0	0	0	0	0	0	0	0	0
1.73	D.novamexicana	Dnov	23.67	Female	6	0	0	0	0	0	0	0	0	0.00165896	0.00831643	0.00673576	0	0	0	0	0.00349084	0	0.00461833	0	0.0646451	0	0.00958026	0	0	0	0	0	0	0	0.000295059	0	0.000696415	0	0.0111321	0	0	0	0	0	0	0	0	0	0
1.43	D.novamexicana	Dnov	26.5	Male	1	0	0	0	0	0	0	0	0	0.00441888	0.0200585	0.0115202	0	0	0	0	0.00425988	0	0.00748636	0	0.123724	0	0.0158548	0	0	0	0	0	0	0	0.000533931	0	0.00153553	0	0.026311	0	0	0	0	0	0	0	0	0	0
1.73	D.novamexicana	Dnov	27.9	Male	2	0	0	0	0	0	0	0	0	0.00368786	0.0176513	0.00910838	0	0	0	0	0.00309604	0	0.00518385	0	0.10235	0	0.0138866	0	0	0	0	0	0	0	0.000407264	0	0.00111008	0	0.0262982	0	0	0	0	0	0	0	0	0	0
1.48	D.novamexicana	Dnov	24.22	Male	3	0	0	0	0	0	0	0	0	0.00186487	0.00948312	0.00552603	0	0	0	0	0.000558641	0	0.00257069	0	0.0813204	0	0.0174653	0	0	0	0	0	0	0	0	0	0.000452932	0	0.014772	0	0	0	0	0	0	0	0	0	0
1.63	D.novamexicana	Dnov	30.89	Male	4	0	0	0	0	0	0	0	0	0.00146626	0.0080886	0.00491376	0	0	0	0	0.000414607	0	0.00217296	0	0.0688809	0	0.0141914	0	0	0	0	0	0	0	0	0	0.000333447	0	0.0127807	0	0	0	0	0	0	0	0	0	0
1.91	D.novamexicana	Dnov	28.4	Male	5	0	0	0	0	0	0	0	0	0.00191623	0.0105419	0.00549732	0	0	0	0	0.00124592	0	0.00279822	0	0.0691509	0	0.013677	0	0	0	0	0	0	0	0	0	0.000445818	0	0.0127977	0	0	0	0	0	0	0	0	0	0
1.65	D.novamexicana	Dnov	23.7	Male	6	0	0	0	0	0	0	0	0	0.00178788	0.0100305	0.0054039	0	0	0	0	0.000884522	0	0.0026023	0	0.082769	0	0.0152085	0	0	0	0	0	0	0	0	0	0.000516068	0	0.0139234	0	0	0	0	0	0	0	0	0	0
0.77	D.paulistorum	Dpau	6.91	Female	1	0	0	0	0	0	0	0	0	0	0	0.00652861	0	0	0	0	0	0	0	0	0	0	0	0	0	0	0	0	0	0	0	0	0	0	0	0	0	0	0	0	0.00622591	0	0.0062967	0	0
0.75	D.paulistorum	Dpau	4.82	Female	2	0	0	0	0	0	0	0	0	0	0	0.00524738	0	0	0	0	0	0	0	0	0	0	0	0	0	0	0	0	0	0	0	0	0	0	0	0	0	0	0	0	0.00522471	0	0.0100202	0	0
0.79	D.paulistorum	Dpau	5.08	Female	3	0	0	0	0	0	0	0	0	0	0	0.00657738	0	0	0	0	0	0	0	0	0	0	0	0	0	0	0	0	0	0	0	0	0	0	0	0	0	0	0	0	0.00575168	0	0.00537013	0	0
0.81	D.paulistorum	Dpau	4.4	Female	4	0	0	0	0	0	0	0	0	0	0	0.0078574	0	0	0	0	0	0	0	0	0	0	0	0	0	0	0	0	0	0	0	0	0	0	0	0	0	0	0	0	0.00514648	0	0.00733255	0	0
0.77	D.paulistorum	Dpau	6.4	Female	5	0	0	0	0	0	0	0	0	0	0	0.00668833	0	0	0	0	0	0	0	0	0	0	0	0	0	0	0	0	0	0	0	0	0	0	0	0	0	0	0	0	0.00546797	0	0.0110192	0	0
0.69	D.paulistorum	Dpau	4.82	Female	6	0	0	0	0	0	0	0	0	0	0	0.0088897	0	0	0	0	0	0	0	0	0	0	0	0	0	0	0	0	0	0	0	0	0	0	0	0	0	0	0	0	0.00682692	0	0.00983746	0	0
0.57	D.paulistorum	Dpau	7.17	Male	1	0	0	0	0	0	0	0	0	0	0	0.0135931	0	0	0	0	0	0	0	0	0.000446702	0	0	0	0	0	0	0	0	0	0	0	0	0	0	0	0	0	0	0	0.00650895	0	0.0102073	0	0
0.55	D.paulistorum	Dpau	6.36	Male	2	0	0	0	0	0	0	0	0	0	0	0.00978293	0	0	0	0	0	0	0	0	0.00134675	0	0	0	0	0	0	0	0	0	0	0	0	0	0	0	0	0	0	0	0.00795833	0	0.0141046	0	0
0.58	D.paulistorum	Dpau	7.73	Male	3	0	0	0	0	0	0	0	0	0	0	0.00972751	0	0	0	0	0	0	0	0	0.000778227	0	0	0	0	0	0	0	0	0	0	0	0	0	0	0	0	0	0	0	0.00610923	0	0.0106583	0	0
0.54	D.paulistorum	Dpau	6.14	Male	4	0	0	0	0	0	0	0	0	0	0	0.0175937	0	0	0	0	0	0	0	0	0.000707278	0	0	0	0	0	0	0	0	0	0	0	0	0	0	0	0	0	0	0	0.00856889	0	0.0154881	0	0
0.55	D.paulistorum	Dpau	6.55	Male	5	0	0	0	0	0	0	0	0	0	0	0.0138638	0	0	0	0	0	0	0	0	0.000989019	0	0	0	0	0	0	0	0	0	0	0	0	0	0	0	0	0	0	0	0.00818571	0	0.0185123	0	0
0.53	D.paulistorum	Dpau	5.64	Male	6	0	0	0	0	0	0	0	0	0	0	0.0139809	0	0	0	0	0	0	0	0	0.00102634	0	0	0	0	0	0	0	0	0	0	0	0	0	0	0	0	0	0	0	0.0108542	0	0.0285876	0	0
1.44	D.persimilis	Dper	18.9	Female	2	0	0	0	0	0	0	0	0.00140588	0.00468542	0.0234204	0.00147326	0	0	0	0	0	0	0.0184557	0.00308819	0.00318355	0	0	0	0	0	0	0	0	0	0	0	0.142309	0	0.0122214	0	0	0	0	0	0	0	0	0	0
1.5	D.persimilis	Dper	19.2	Female	3	0	0	0	0	0	0	0	0.0013836	0.00436467	0.0236274	0.00115811	0	0	0	0	0	0	0.0230246	0.00356	0.00384322	0	0	0	0	0	0	0	0	0	0	0	0.132023	0	0.0168582	0	0	0	0	0	0	0	0	0	0
1.56	D.persimilis	Dper	16	Female	4	0	0	0	0	0	0	0	0.000529666	0.00258205	0.0136121	0.000778513	0	0	0	0	0	0	0.00818645	0.00297949	0.00162031	0	0	0	0	0	0	0	0	0	0	0	0.0899587	0	0.00664297	0	0	0	0	0	0	0	0	0	0
1.47	D.persimilis	Dper	21	Female	5	0	0	0	0	0	0	0	0.00138653	0.00623946	0.0264325	0.00208845	0	0	0	0	0	0	0.0108624	0.00299456	0.00575611	0	0	0	0	0	0	0	0	0	0	0	0.109828	0	0.0176486	0	0	0	0	0	0	0	0	0	0
1.55	D.persimilis	Dper	24.3	Female	6	0	0	0	0	0	0	0	0.000938372	0.00425613	0.021215	0.0024726	0	0	0	0	0	0	0.00935319	0.0025871	0.00398805	0	0	0	0	0	0	0	0	0	0	0	0.100172	0	0.00591898	0	0	0	0	0	0	0	0	0	0
1.05	D.persimilis	Dper	23.67	Male	2	0	0	0	0	0	0	0	0.000872401	0.0038381	0.019969	0.00132649	0	0	0	0	0	0	0.0151935	0.00465524	0.00262225	0	0	0	0	0	0	0	0	0	0	0	0.139645	0	0.00417533	0	0	0	0	0	0	0	0	0	0
1.09	D.persimilis	Dper	20.44	Male	3	0	0	0	0	0	0	0	0.000640859	0.00333945	0.0177457	0.0016572	0	0	0	0	0	0	0.0100277	0.00228716	0.00204503	0	0	0	0	0	0	0	0	0	0	0	0.117698	0	0.00162456	0	0	0	0	0	0	0	0	0	0
1.21	D.persimilis	Dper	24	Male	4	0	0	0	0	0	0	0	0.00169249	0.00536116	0.0279596	0.00195532	0	0	0	0	0	0	0.0238564	0.00418678	0.00273941	0	0	0	0	0	0	0	0	0	0	0	0.153381	0	0.00448406	0	0	0	0	0	0	0	0	0	0
1.13	D.persimilis	Dper	27.9	Male	5	0	0	0	0	0	0	0	0.00101383	0.0042885	0.0250214	0.00176179	0	0	0	0	0	0	0.0184708	0.00435044	0.00347619	0	0	0	0	0	0	0	0	0	0	0	0.140247	0	0.00704148	0	0	0	0	0	0	0	0	0	0
1.09	D.persimilis	Dper	28.9	Male	6	0	0	0	0	0	0	0	0.00111928	0.00526881	0.0245784	0.00222982	0	0	0	0	0	0	0.0113441	0.00350184	0.00459335	0	0	0	0	0	0	0	0	0	0	0	0.139705	0	0.00358995	0	0	0	0	0	0	0	0	0	0
1.36	D.prosaltans	Dpro	17	Female	1	0	0	0	0	0	0	0	0	0	0.00316297	0.0337645	0	0	0	0	0	0	0	0	0	0	0	0.00212868	0	0.00184584	0	0.00183911	0	0	0	0	0	0	0	0	0	0	0.183302	0	0.0841393	0	0	0	0
1.32	D.prosaltans	Dpro	17.22	Female	2	0	0	0	0	0	0	0	0	0	0.00297344	0.0302572	0	0	0	0	0	0	0	0	0	0	0	0.00265491	0	0.00260423	0	0.00205274	0	0	0	0	0	0	0	0	0	0	0.112214	0	0.0810045	0	0	0	0
1.29	D.prosaltans	Dpro	14.75	Female	3	0	0	0	0	0	0	0	0	0	0.00294839	0.0315805	0	0	0	0	0	0	0	0	0	0	0	0.00233606	0	0.00259467	0	0.00203585	0	0	0	0	0	0	0	0	0	0	0.106219	0	0.0749388	0	0	0	0
1.28	D.prosaltans	Dpro	16.25	Female	4	0	0	0	0	0	0	0	0	0	0.00376887	0.0365113	0	0	0	0	0	0	0	0	0	0	0	0.00242045	0	0.00227924	0	0.00218203	0	0	0	0	0	0	0	0	0	0	0.188325	0	0.0999173	0	0	0	0
1.39	D.prosaltans	Dpro	14.5	Female	5	0	0	0	0	0	0	0	0	0	0.00250024	0.0330578	0	0	0	0	0	0	0	0	0	0	0	0.00651618	0	0.00274968	0	0.00167946	0	0	0	0	0	0	0	0	0	0	0.0623332	0	0.0765052	0	0	0	0
0.81	D.prosaltans	Dpro	14.33	Male	1	0	0	0	0	0	0	0	0	0	0.0039605	0.0410521	0	0	0	0	0	0	0	0	0	0	0	0.00156758	0	0.003518	0	0.00288203	0	0	0	0	0	0	0	0	0	0	0.245443	0	0.0970112	0	0	0	0
0.84	D.prosaltans	Dpro	15.44	Male	2	0	0	0	0	0	0	0	0	0	0.00267623	0.029996	0	0	0	0	0	0	0	0	0	0	0	0.00197515	0	0.00261158	0	0.00193545	0	0	0	0	0	0	0	0	0	0	0.107591	0	0.033647	0	0	0	0
0.9	D.prosaltans	Dpro	13.78	Male	3	0	0	0	0	0	0	0	0	0	0.00264633	0.0347946	0	0	0	0	0	0	0	0	0	0	0	0.00103461	0	0.00288979	0	0.00287174	0	0	0	0	0	0	0	0	0	0	0.170036	0	0.0646604	0	0	0	0
0.8	D.prosaltans	Dpro	14.33	Male	4	0	0	0	0	0	0	0	0	0	0.0018683	0.0325143	0	0	0	0	0	0	0	0	0	0	0	0.00184113	0	0.00248773	0	0.00171957	0	0	0	0	0	0	0	0	0	0	0.128763	0	0.061696	0	0	0	0
0.79	D.prosaltans	Dpro	14.4	Male	5	0	0	0	0	0	0	0	0	0	0.00199962	0.0330231	0	0	0	0	0	0	0	0	0	0	0	0.00111437	0	0.0022902	0	0.00437972	0	0	0	0	0	0	0	0	0	0	0.182446	0	0.0575696	0	0	0	0
0.78	D.pseudoananassae	Dpda	7.38	Female	1	0	0	0	0	0	0	0	0	0	0	0.00693764	0	0	0	0	0	0	0	0	0	0	0	0.00060774	0	0.000695868	0	0	0	0	0	0	0	0	0	0	0	0	0.0251145	0	0.00176366	0	0	0	0
0.57	D.pseudoananassae	Dpda	5.5	Female	2	0	0	0	0	0	0	0	0	0	0	0.012811	0	0	0	0	0	0	0	0	0	0	0	0.00139597	0	0.00154739	0	0	0	0	0	0	0	0	0	0	0	0	0.0596716	0	0.00438805	0	0	0	0
0.78	D.pseudoananassae	Dpda	7	Female	3	0	0	0	0	0	0	0	0	0	0	0.00305493	0	0	0	0	0	0	0	0	0	0	0	0	0	0.000405923	0	0	0	0	0	0	0	0	0	0	0	0	0.00918024	0	0.00165677	0	0	0	0
0.78	D.pseudoananassae	Dpda	6	Female	4	0	0	0	0	0	0	0	0	0	0	0.0079231	0	0	0	0	0	0	0	0	0	0	0	0.00069456	0	0.00115978	0	0	0	0	0	0	0	0	0	0	0	0	0.0367865	0	0.00347388	0	0	0	0
0.66	D.pseudoananassae	Dpda	6.82	Female	5	0	0	0	0	0	0	0	0	0	0	0.00549707	0	0	0	0	0	0	0	0	0	0	0	0.000359119	0	0.000719591	0	0	0	0	0	0	0	0	0	0	0	0	0.0137167	0	0.00271594	0	0	0	0
0.8	D.pseudoananassae	Dpda	7	Female	6	0	0	0	0	0	0	0	0	0	0	0.00603397	0	0	0	0	0	0	0	0	0	0	0	0.000507897	0	0.00104598	0	0	0	0	0	0	0	0	0	0	0	0	0.0246785	0	0.00151114	0	0	0	0
0.57	D.pseudoananassae	Dpda	5.67	Male	1	0	0	0	0	0	0	0	0	0	0	0.00881934	0	0	0	0	0	0	0	0	0	0	0	0.000683136	0	0.00206319	0.0017893	0	0	0	0	0	0	0	0	0	0	0	0.0419944	0	0	0	0	0	0
0.44	D.pseudoananassae	Dpda	6.6	Male	2	0	0	0	0	0	0	0	0	0	0	0.0195309	0	0	0	0	0	0	0	0	0	0	0	0.00173147	0	0.00328956	0.00251664	0	0	0	0	0	0	0	0	0	0	0	0.101132	0	0	0	0	0	0
0.51	D.pseudoananassae	Dpda	6.5	Male	3	0	0	0	0	0	0	0	0	0	0	0.0127507	0	0	0	0	0	0	0	0	0	0	0	0.00116186	0	0.00274936	0.00211408	0	0	0	0	0	0	0	0	0	0	0	0.0768209	0	0	0	0	0	0
0.51	D.pseudoananassae	Dpda	5.1	Male	4	0	0	0	0	0	0	0	0	0	0	0.00943491	0	0	0	0	0	0	0	0	0	0	0	0.00112866	0	0.00186247	0.00177126	0	0	0	0	0	0	0	0	0	0	0	0.0524508	0	0	0	0	0	0
0.53	D.pseudoananassae	Dpda	9.5	Male	5	0	0	0	0	0	0	0	0	0	0	0.00719348	0	0	0	0	0	0	0	0	0	0	0	0.000574978	0	0.00153616	0.00192435	0	0	0	0	0	0	0	0	0	0	0	0.0423652	0	0	0	0	0	0
0.54	D.pseudoananassae	Dpda	6.83	Male	5	0	0	0	0	0	0	0	0	0	0	0.0184193	0	0	0	0	0	0	0	0	0	0	0	0.00150488	0	0.00268038	0.00237438	0	0	0	0	0	0	0	0	0	0	0	0.0663965	0	0	0	0	0	0
1.14	D.pseudoobscura	Dpse	21.2	Female	1	0	0	0	0	0	0	0	0	0.00391579	0.0293332	0.00609668	0	0	0	0	0	0	0.00619643	0.0035193	0.0033462	0	0	0	0	0	0	0	0	0	0	0	0.00417571	0.00297368	0.191228	0	0.00423878	0	0	0	0	0	0	0	0
1.06	D.pseudoobscura	Dpse	23.1	Female	2	0	0	0	0	0	0	0	0	0.00301226	0.0233092	0.0029238	0	0	0	0	0	0	0.00361662	0.00441038	0.00206797	0	0	0	0	0	0	0	0	0	0	0	0.00381232	0.00282453	0.166797	0	0.00353874	0	0	0	0	0	0	0	0
1.53	D.pseudoobscura	Dpse	20.4	Female	3	0	0	0	0	0	0	0	0	0.00246667	0.017113	0.00387846	0	0	0	0	0	0	0.0034636	0.00282549	0.00218008	0	0	0	0	0	0	0	0	0	0	0	0.00303731	0.00217516	0.129773	0	0.00369186	0	0	0	0	0	0	0	0
0.91	D.pseudoobscura	Dpse	22.8	Female	4	0	0	0	0	0	0	0	0	0.00416374	0.0256437	0.0033027	0	0	0	0	0	0	0.00558151	0.00587912	0.00211505	0	0	0	0	0	0	0	0	0	0	0	0.0040963	0.00384396	0.218078	0	0.00514427	0	0	0	0	0	0	0	0
1.06	D.pseudoobscura	Dpse	20.8	Female	5	0	0	0	0	0	0	0	0	0.00226415	0.0202908	0.0034053	0	0	0	0	0	0	0.00424987	0.00358396	0.00192275	0	0	0	0	0	0	0	0	0	0	0	0.004014	0.00164528	0.188543	0	0.00429076	0	0	0	0	0	0	0	0
1.1	D.pseudoobscura	Dpse	32.4	Female	6	0	0	0	0	0	0	0	0	0.00418818	0.0283164	0.00483696	0	0	0	0	0	0	0.00502343	0.00475909	0.0032322	0	0	0	0	0	0	0	0	0	0	0	0.00491637	0.00324455	0.22759	0	0.00833681	0	0	0	0	0	0	0	0
0.92	D.pseudoobscura	Dpse	23.6	Male	1	0	0	0	0	0	0	0	0	0.00450978	0.0293684	0.0037163	0	0	0	0	0	0	0.00408525	0.00487717	0.00299656	0	0	0	0	0	0	0	0	0	0	0	0.0077215	0.00276196	0.249753	0	0.00547759	0	0	0	0	0	0	0	0
0.94	D.pseudoobscura	Dpse	23.6	Male	2	0	0	0	0	0	0	0	0	0.00575425	0.031519	0.00518272	0	0	0	0	0	0	0.0057214	0.00543936	0.00463068	0	0	0	0	0	0	0	0	0	0	0	0.00566069	0.00485532	0.260138	0	0.00783358	0	0	0	0	0	0	0	0
1.06	D.pseudoobscura	Dpse	23	Male	3	0	0	0	0	0	0	0	0	0.00658019	0.0355467	0.00488606	0	0	0	0	0	0	0.00435498	0.00462453	0.00478668	0	0	0	0	0	0	0	0	0	0	0	0.00562832	0.00462453	0.23577	0	0.00514244	0	0	0	0	0	0	0	0
0.91	D.pseudoobscura	Dpse	24.8	Male	4	0	0	0	0	0	0	0	0	0.00559121	0.0293894	0.00455282	0	0	0	0	0	0	0.00452036	0.0045967	0.00383456	0	0	0	0	0	0	0	0	0	0	0	0.00752166	0.00436923	0.23965	0	0.00750081	0	0	0	0	0	0	0	0
0.79	D.pseudoobscura	Dpse	27.5	Male	5	0	0	0	0	0	0	0	0	0.00493797	0.029239	0.00435508	0	0	0	0	0	0	0.00400071	0.00558354	0.00236307	0	0	0	0	0	0	0	0	0	0	0	0.00443529	0.00272911	0.241115	0	0.00543072	0	0	0	0	0	0	0	0
0.96	D.pseudoobscura	Dpse	26.44	Male	6	0	0	0	0	0	0	0	0	0.00506771	0.0275333	0.00352142	0	0	0	0	0	0	0.00348286	0.0045625	0.00305616	0	0	0	0	0	0	0	0	0	0	0	0.00645522	0.00427187	0.224713	0	0.00793906	0	0	0	0	0	0	0	0
1.75	D.repleta	Drep	10.5	Female	1	0	0	0	0	0	0	0	0	0	0.00842969	0.0167084	0.00042977	0	0	0	0	0	0	0	0	0	0	0	0	0.000439391	0	0.00352549	0	0	0	0	0	0	0	0	0	0	0.0148488	0	0.0541925	0	0.0103896	0	0
2.06	D.repleta	Drep	19.8	Female	2	0	0	0	0	0	0	0	0	0	0.00548589	0.00905972	0.000253539	0	0	0	0	0	0	0	0	0	0	0	0	0.000680667	0	0.00218551	0	0	0	0	0	0	0	0	0	0	0.0241307	0	0.0730728	0	0.00541333	0	0
1.63	D.repleta	Drep	17	Female	3	0	0	0	0	0	0	0	0	0	0.00849862	0.0139113	0.000307607	0	0	0	0	0	0	0	0	0	0	0	0	0.000457864	0	0.00283877	0	0	0	0	0	0	0	0	0	0	0.00885204	0	0.0896132	0	0.0109313	0	0
1.59	D.repleta	Drep	13.3	Female	4	0	0	0	0	0	0	0	0	0	0.00839144	0.0146674	0.000341624	0	0	0	0	0	0	0	0	0	0	0	0	0.00049783	0	0.0013109	0	0	0	0	0	0	0	0	0	0	0.0176943	0	0.0837138	0	0.00952921	0	0
2.15	D.repleta	Drep	15.2	Female	5	0	0	0	0	0	0	0	0	0	0.00811044	0.0179044	0.000534437	0	0	0	0	0	0	0	0	0	0	0	0	0.00069425	0	0.00120212	0	0	0	0	0	0	0	0	0	0	0.0189025	0	0.0887244	0	0.0934738	0	0
2.25	D.repleta	Drep	16.7	Female	6	0	0	0	0	0	0	0	0	0	0.0094836	0.0211945	0.00110493	0	0	0	0	0	0	0	0	0	0	0	0	0.00118607	0	0.00138955	0	0	0	0	0	0	0	0	0	0	0.0207361	0	0.09964	0	0.0167003	0	0
1.49	D.repleta	Drep	17.67	Male	1	0	0	0	0	0	0	0	0	0	0.020519	0.023359	0	0	0	0	0	0	0	0	0	0	0.00117864	0	0	0.00115355	0	0	0	0	0	0	0	0	0	0	0.00742173	0.0102147	0.0106552	0	0.0583891	0	0.0108196	0	0
1.69	D.repleta	Drep	19.3	Male	2	0	0	0	0	0	0	0	0	0.000254438	0.020521	0.00729543	0	0	0	0	0	0	0	0	0.000677982	0	0.0034016	0	0	0	0	0	0	0	0	0	0	0	0	0	0.0410303	0.0125421	0.00115086	0	0.00865797	0	0	0	0
1.38	D.repleta	Drep	16.6	Male	3	0	0	0	0	0	0	0	0	0.000188406	0.0135604	0.00581507	0	0	0	0	0	0	0	0	0	0	0.00258494	0	0	0	0	0	0	0	0	0	0	0	0	0	0.0139388	0.0119491	0.00478535	0	0.0095154	0	0	0	0
1.46	D.repleta	Drep	17.2	Male	4	0	0	0	0	0	0	0	0	0	0.0133334	0.0105927	0	0	0	0	0	0	0	0	0	0	0.0010619	0	0	0	0	0	0	0	0	0	0	0	0	0	0.00545984	0.00492822	0.0125626	0	0.0390311	0	0	0	0
1.8	D.repleta	Drep	9.36	Male	5	0	0	0	0	0	0	0	0	0	0.0134342	0.0103256	0.000441045	0	0	0	0	0	0	0	0.000250762	0	0.000922294	0	0	0.000389493	0	0	0	0	0	0	0	0	0	0	0.0223485	0.0162151	0.0122125	0	0.0512976	0	0.00417506	0	0
1.9	D.repleta	Drep	18	Male	6	0	0	0	0	0	0	0	0	0	0.0167307	0.011271	0.000395841	0	0	0	0	0	0	0	0.000450763	0	0.00101817	0	0	0.000404702	0	0	0	0	0	0	0	0	0	0	0.0316645	0.0142389	0.00559441	0	0.0204044	0	0.0241785	0	0
1.41	D.saltans	Dsal	19.6	Female	1	0	0	0	0	0	0	0	0	0	0.00145646	0.021577	0	0	0	0	0	0	0	0	0	0	0	0.00258151	0	0.00227761	0	0.00127129	0	0	0	0	0	0	0	0	0	0	0.0784255	0	0.106966	0	0.0119492	0	0
1.27	D.saltans	Dsal	20.4	Female	2	0	0	0	0	0	0	0	0	0	0.00134911	0.0241371	0	0	0	0	0	0	0	0	0	0	0	0.00258614	0	0.00292046	0	0.00121449	0	0	0	0	0	0	0	0	0	0	0.0848558	0	0.114556	0	0.0101169	0	0
1.45	D.saltans	Dsal	19.8	Female	3	0	0	0	0	0	0	0	0	0	0.00167607	0.0250848	0	0	0	0	0	0	0	0	0	0	0	0.0029423	0	0.00308822	0	0.0019262	0	0	0	0	0	0	0	0	0	0	0.0852921	0	0.12506	0	0.00894458	0	0
1.47	D.saltans	Dsal	20.1	Female	4	0	0	0	0	0	0	0	0	0	0.00147141	0.024984	0	0	0	0	0	0	0	0	0	0	0	0.00468739	0	0.00287696	0	0.00226865	0	0	0	0	0	0	0	0	0	0	0.0602631	0	0.0912282	0	0.00931762	0	0
1.46	D.saltans	Dsal	18.9	Female	5	0	0	0	0	0	0	0	0	0	0.00160633	0.0206906	0	0	0	0	0	0	0	0	0	0	0	0.00267863	0	0.00340785	0	0.00154183	0	0	0	0	0	0	0	0	0	0	0.0823257	0	0.111697	0	0.0104607	0	0
1	D.saltans	Dsal	18.6	Male	1	0	0	0	0	0	0	0	0	0	0.00111794	0.0200466	0	0	0	0	0	0	0	0	0	0	0	0.00193001	0	0.00156048	0	0.0015424	0	0	0	0	0	0	0	0	0	0	0.0719639	0	0.106884	0	0.0151514	0	0
1.06	D.saltans	Dsal	18.2	Male	2	0	0	0	0	0	0	0	0	0	0.00132979	0.0259168	0	0	0	0	0	0	0	0	0	0	0	0.00138953	0	0.00390441	0	0.00200567	0	0	0	0	0	0	0	0	0	0	0.0787954	0	0.123486	0	0.0136077	0	0
1.08	D.saltans	Dsal	19.2	Male	3	0	0	0	0	0	0	0	0	0	0.00148519	0.0252092	0	0	0	0	0	0	0	0	0	0	0	0.00163029	0	0.0033086	0	0.00200713	0	0	0	0	0	0	0	0	0	0	0.0695695	0	0.133165	0	0.0124579	0	0
0.97	D.saltans	Dsal	17.7	Male	4	0	0	0	0	0	0	0	0	0	0.00147823	0.0290188	0	0	0	0	0	0	0	0	0	0	0	0.00106466	0	0.00391695	0	0.0028364	0	0	0	0	0	0	0	0	0	0	0.0689694	0	0.126907	0	0.0111215	0	0
0.98	D.saltans	Dsal	20	Male	5	0	0	0	0	0	0	0	0	0	0.00167394	0.027405	0	0	0	0	0	0	0	0	0	0	0	0.00136476	0	0.00323082	0	0.00289253	0	0	0	0	0	0	0	0	0	0	0.0724409	0	0.140118	0	0.0103896	0	0
1.24	D.serrata	Dser	26.3	Female	1	0	0	0	0	0	0	0	0	0.00101613	0.015601	0.00632284	0	0	0	0	0	0	0.000540596	0.00195968	0.000541347	0	0	0	0	0	0	0	0	0	0	0.000443366	0.0351314	0	0.00555348	0	0.00451435	0	0	0	0	0	0	0	0
1.2	D.serrata	Dser	27.55	Female	2	0	0	0	0	0	0	0	0	0.000725	0.0160907	0.00582899	0	0	0	0	0	0	0.000415188	0.00236667	0.000559392	0	0	0	0	0	0	0	0	0	0	0.00047162	0.0453007	0	0.00714672	0	0.00613973	0	0	0	0	0	0	0	0
1.24	D.serrata	Dser	21.4	Female	3	0	0	0	0	0	0	0	0	0.00166935	0.0208928	0.00547979	0	0	0	0	0	0	0.000460237	0.00204032	0.000513347	0	0	0	0	0	0	0	0	0	0	0.000345565	0.0499175	0	0.00716818	0	0.0044037	0	0	0	0	0	0	0	0
1.13	D.serrata	Dser	27.5	Female	4	0	0	0	0	0	0	0	0	0.00112389	0.0209264	0.00816275	0	0	0	0	0	0	0.00111429	0.00314159	0.000501865	0	0	0	0	0	0	0	0	0	0	0.000822801	0.0663525	0	0.0105597	0	0.00678719	0	0	0	0	0	0	0	0
1.18	D.serrata	Dser	26.8	Female	5	0	0	0	0	0	0	0	0	0.000855932	0.0150144	0.00535455	0	0	0	0	0	0	0.000621822	0.00227119	0.000460984	0	0	0	0	0	0	0	0	0	0	0.000479614	0.0407946	0	0.00642435	0	0.0057322	0	0	0	0	0	0	0	0
0.79	D.serrata	Dser	14.64	Male	1	0	0	0	0	0	0	0	0	0.00350633	0.0302558	0.00480655	0	0	0	0	0	0	0.0016168	0.00351899	0.00221217	0	0	0	0	0	0	0	0	0	0	0.000900598	0.0977645	0	0.00774994	0	0.00138937	0	0	0	0	0	0	0	0
0.85	D.serrata	Dser	15.56	Male	2	0	0	0	0	0	0	0	0	0.00184706	0.0181558	0.00394277	0	0	0	0	0	0	0.00155595	0.00336471	0.00232834	0	0	0	0	0	0	0	0	0	0	0.000722887	0.0710517	0	0.00661739	0	0.000952334	0	0	0	0	0	0	0	0
0.92	D.serrata	Dser	17.4	Male	3	0	0	0	0	0	0	0	0	0.00283696	0.0225728	0.00349238	0	0	0	0	0	0	0.0012111	0.0038913	0.00244053	0	0	0	0	0	0	0	0	0	0	0.000562429	0.0766341	0	0.00709514	0	0.000894787	0	0	0	0	0	0	0	0
0.81	D.serrata	Dser	17.27	Male	4	0	0	0	0	0	0	0	0	0.00402469	0.0332892	0.00525724	0	0	0	0	0	0	0.0014203	0.00435802	0.00248619	0	0	0	0	0	0	0	0	0	0	0.00127762	0.110616	0	0.0076586	0	0.000846918	0	0	0	0	0	0	0	0
0.83	D.serrata	Dser	15.55	Male	5	0	0	0	0	0	0	0	0	0.00114458	0.0148893	0.00292646	0	0	0	0	0	0	0.0010914	0.00369879	0.00204979	0	0	0	0	0	0	0	0	0	0	0.000506525	0.0674596	0	0.00587048	0	0.00117365	0	0	0	0	0	0	0	0
1.24	D.simulans	Dsim	13.1	Female	1	0	0.00174211	0	0	0	0.00196472	0	0	0.00590887	0.00339067	0	0	0	0	0.00147116	0.120945	0.00403203	0.013745	0	0	0	0	0	0	0	0	0	0	0	0	0	0	0	0	0	0	0	0	0	0	0	0	0	0
1.01	D.simulans	Dsim	9.6	Female	2	0	0.00275998	0	0	0	0.00302633	0	0	0.00439307	0.00366471	0	0	0	0	0.00207559	0.161628	0.00666565	0.0184276	0	0	0	0	0	0	0	0	0	0	0	0	0	0	0	0	0	0	0	0	0	0	0	0	0	0
1.24	D.simulans	Dsim	11.1	Female	3	0	0.00189716	0	0	0	0.00200578	0	0	0.00580161	0.0037366	0	0	0	0	0.00167397	0.128099	0.0048027	0.0130298	0	0	0	0	0	0	0	0	0	0	0	0	0	0	0	0	0	0	0	0	0	0	0	0	0	0
1.24	D.simulans	Dsim	10.3	Female	4	0	0.00168953	0	0	0	0.00203845	0	0	0.00389194	0.00262042	0	0	0	0	0.00146848	0.116867	0.00332199	0.0118712	0	0	0	0	0	0	0	0	0	0	0	0	0	0	0	0	0	0	0	0	0	0	0	0	0	0
1.18	D.simulans	Dsim	12	Female	5	0	0.00130522	0	0	0	0.000752286	0	0.00061048	0.00759322	0.00253946	0	0	0	0	0.000656837	0.102339	0.00275915	0.00570003	0	0	0	0	0	0	0	0	0	0	0	0	0	0	0	0	0	0	0	0	0	0	0	0	0	0
1.16	D.simulans	Dsim	11.4	Female	6	0	0.00141891	0	0	0	0.00106857	0	0.000878189	0.00971121	0.00336681	0	0	0	0	0.00154509	0.121251	0.00265757	0.00814497	0	0	0	0	0	0	0	0	0	0	0	0	0	0	0	0	0	0	0	0	0	0	0	0	0	0
0.69	D.simulans	Dsim	4.33	Male	1	0	0.00118403	0	0	0	0	0	0.00160878	0.0232203	0.00192311	0	0	0	0	0.00143472	0.135967	0.00198725	0.0108454	0	0	0	0	0	0	0	0	0	0	0	0	0	0	0	0	0	0	0	0	0	0	0	0	0	0
0.67	D.simulans	Dsim	3.3	Male	2	0	0.00370182	0	0	0	0.00148039	0	0	0.0119806	0.00279123	0	0	0	0	0.00269395	0.221827	0.00915044	0.0274531	0	0	0	0	0	0	0	0	0	0	0	0	0	0	0	0	0	0	0	0	0	0	0	0	0	0
0.69	D.simulans	Dsim	5.1	Male	3	0	0.00224368	0	0	0	0	0	0	0.0144362	0.00198475	0	0	0	0	0.00188114	0.163162	0.00477127	0.0171182	0	0	0	0	0	0	0	0	0	0	0	0	0	0	0	0	0	0	0	0	0	0	0	0	0	0
0.72	D.simulans	Dsim	4	Male	4	0	0.00284044	0	0	0	0	0	0	0.0132375	0.00243199	0	0	0	0	0.0021197	0.19116	0.00718435	0.0220955	0	0	0	0	0	0	0	0	0	0	0	0	0	0	0	0	0	0	0	0	0	0	0	0	0	0
0.69	D.simulans	Dsim	5.4	Male	5	0	0.00299865	0	0	0	0	0	0	0.0144971	0.00293222	0	0	0	0	0.00226682	0.196994	0.00812827	0.0222961	0	0	0	0	0	0	0	0	0	0	0	0	0	0	0	0	0	0	0	0	0	0	0	0	0	0
0.73	D.simulans	Dsim	5.44	Male	6	0	0.00222008	0	0	0	0	0	0.00155053	0.018089	0.00146651	0	0	0	0	0.00191295	0.163317	0.00496613	0.0151478	0	0	0	0	0	0	0	0	0	0	0	0	0	0	0	0	0	0	0	0	0	0	0	0	0	0
1.61	D.sturtevanti	Dstu	10	Female	1	0	0	0	0	0	0	0	0	0	0.000384924	0.0179895	0.000752617	0	0	0	0	0	0	0	0	0	0	0.000399588	0	0.000927104	0	0.00308118	0	0	0	0	0	0	0	0	0	0	0	0	0.0146291	0	0.053303	0	0
1.56	D.sturtevanti	Dstu	8.7	Female	2	0	0	0	0	0	0	0	0	0	0.00070105	0.0173441	0.000709779	0	0	0	0	0	0	0	0	0	0	0.00214879	0	0.00410272	0	0.00427554	0	0	0	0	0	0	0	0	0	0	0	0	0.0182512	0	0.0505825	0	0
1.53	D.sturtevanti	Dstu	9.7	Female	3	0	0	0	0	0	0	0	0	0	0.000563895	0.0175535	0.00079197	0	0	0	0	0	0	0	0	0	0	0.00193643	0	0.00430142	0	0.0045501	0	0	0	0	0	0	0	0	0	0	0	0	0.0191812	0	0.0506236	0	0
1.63	D.sturtevanti	Dstu	11.1	Female	4	0	0	0	0	0	0	0	0	0	0.00048457	0.0203812	0.000986904	0	0	0	0	0	0	0	0	0	0	0.000862074	0	0.00190083	0	0.00636806	0	0	0	0	0	0	0	0	0	0	0	0	0.0176976	0	0.0835095	0	0
1.56	D.sturtevanti	Dstu	10.5	Female	5	0	0	0	0	0	0	0	0	0	0.000490735	0.021148	0.000816916	0	0	0	0	0	0	0	0	0	0	0.00213794	0	0.00289945	0	0.00502376	0	0	0	0	0	0	0	0	0	0	0	0	0.0218854	0	0.0616936	0	0
1.24	D.sturtevanti	Dstu	9.4	Male	1	0	0	0	0	0	0	0	0	0	0.000127395	0.0151376	0.000994036	0	0	0	0	0	0	0	0	0	0	0.000709963	0	0.00116726	0	0.00359714	0	0	0	0	0	0	0	0	0	0	0	0	0.0144894	0	0.03695	0	0
1.21	D.sturtevanti	Dstu	10.9	Male	2	0	0	0	0	0	0	0	0	0	0	0.0212048	0.00143306	0	0	0	0	0	0	0	0	0	0	0.00131522	0	0.00181299	0	0.00706259	0	0	0	0	0	0	0	0	0	0	0	0	0.0393438	0	0.0785371	0	0
1.27	D.sturtevanti	Dstu	9.7	Male	3	0	0	0	0	0	0	0	0	0	0.000105249	0.0150221	0.00106926	0	0	0	0	0	0	0	0	0	0	0.000706523	0	0.0011753	0	0.00443124	0	0	0	0	0	0	0	0	0	0	0	0	0.016609	0	0.0345501	0	0
1.32	D.sturtevanti	Dstu	11.22	Male	4	0	0	0	0	0	0	0	0	0	0	0.020649	0.00136112	0	0	0	0	0	0	0	0	0	0	0.00111583	0	0.00162765	0	0.00694775	0	0	0	0	0	0	0	0	0	0	0	0	0.0329387	0	0.0714413	0	0
1.27	D.sturtevanti	Dstu	11.78	Male	5	0	0	0	0	0	0	0	0	0	0	0.0182783	0.00120086	0	0	0	0	0	0	0	0	0	0	0.000786507	0	0.00170953	0	0.0068274	0	0	0	0	0	0	0	0	0	0	0	0	0.0367629	0	0.0829392	0	0
2.37	D.sulfrigaster	Dsul	9.4	Female	1	0	0	0	0	0	0	0	0	0	0.00122028	0.0141472	0.000661127	0	0	0	0	0	0	0	0	0	0	0	0	0.000438955	0	0.00557579	0.00122811	0	0	0	0	0	0	0	0	0	0	0	0.0253109	0.0016516	0.101112	0	0.0144584
2.52	D.sulfrigaster	Dsul	10.3	Female	2	0	0	0	0	0	0	0	0	0	0.000988518	0.0130062	0.000671516	0	0	0	0	0	0	0	0	0	0	0	0	0.000448725	0	0.00405286	0.00123466	0	0	0	0	0	0	0	0	0	0	0	0.0190898	0.00163294	0.0885999	0	0.0103224
2.23	D.sulfrigaster	Dsul	9.1	Female	3	0	0	0	0	0	0	0	0	0	0.00108437	0.0126363	0.000674527	0	0	0	0	0	0	0	0	0	0	0	0	0.000496937	0	0.00336483	0.00166527	0	0	0	0	0	0	0	0	0	0	0	0.0272738	0.0012152	0.106916	0	0.0141323
2.32	D.sulfrigaster	Dsul	7.4	Female	4	0	0	0	0	0	0	0	0	0	0.00117325	0.0153467	0.00063035	0	0	0	0	0	0	0	0	0	0	0	0	0.000779852	0	0.00415068	0.00233611	0	0	0	0	0	0	0	0	0	0	0	0.0351101	0.00322297	0.15956	0	0.0189745
2.35	D.sulfrigaster	Dsul	8.64	Female	5	0	0	0	0	0	0	0	0	0	0.000822168	0.0131751	0.000728984	0	0	0	0	0	0	0	0	0	0	0	0	0.000538928	0	0.00393805	0.00158023	0	0	0	0	0	0	0	0	0	0	0	0.0326574	0.00326724	0.133126	0	0.0157522
1.83	D.sulfrigaster	Dsul	8.4	Male	1	0	0	0	0	0	0	0	0	0	0.00244359	0.0229337	0.000833381	0	0	0	0	0	0	0	0	0	0	0	0	0.000580841	0	0.0113898	0.005128	0	0	0	0	0	0	0	0	0	0	0	0.00722111	0.018757	0.0740516	0.118278	0.0325291
1.93	D.sulfrigaster	Dsul	8.9	Male	2	0	0	0	0	0	0	0	0	0	0.000931827	0.0137721	0.000746902	0	0	0	0	0	0	0	0	0	0	0	0	0.000738233	0	0.00632857	0.00299019	0	0	0	0	0	0	0	0	0	0	0	0.00654457	0.016667	0.0575284	0.0694668	0.0168474
1.58	D.sulfrigaster	Dsul	10	Male	3	0	0	0	0	0	0	0	0	0	0.000938283	0.0140499	0.000899133	0	0	0	0	0	0	0	0	0	0	0	0	0.000772942	0	0.00517124	0.00476422	0	0	0	0	0	0	0	0	0	0	0	0.00704449	0.0195015	0.0989639	0.0531899	0.0142473
1.8	D.sulfrigaster	Dsul	8.7	Male	4	0	0	0	0	0	0	0	0	0	0.0012219	0.015117	0.000731206	0	0	0	0	0	0	0	0	0	0	0	0	0.000603086	0	0.006693	0.00278795	0	0	0	0	0	0	0	0	0	0	0	0.00678564	0.0120161	0.0526597	0.0579412	0.0101437
1.82	D.sulfrigaster	Dsul	7.2	Male	5	0	0	0	0	0	0	0	0	0	0.00166917	0.0187857	0.000929792	0	0	0	0	0	0	0	0	0	0	0	0	0.000720721	0	0.00558874	0.00405325	0	0	0	0	0	0	0	0	0	0	0	0.0103071	0.0213692	0.0753909	0.104477	0.025699
1.7	D.suzukii	Dsuz	8.6	Female	1	0.0111596	0.0013619	0	0	0	0.00281852	0.00478588	0	0	0.00073624	0	0	0	0	0.000782699	0.0606875	0	0.00622912	0	0	0	0	0	0	0	0	0	0	0	0	0	0	0	0	0	0	0	0	0	0	0	0	0	0
1.49	D.suzukii	Dsuz	10.8	Female	2	0.0123659	0.00132166	0	0	0	0.0024157	0.00265193	0	0	0.000554567	0	0	0	0	0.000942128	0.070201	0	0.00737455	0	0	0	0	0	0	0	0	0	0	0	0	0	0	0	0	0	0	0	0	0	0	0	0	0	0
1.49	D.suzukii	Dsuz	9.5	Female	3	0.00852422	0.000933198	0	0	0	0.00374395	0.00178637	0	0	0.00109282	0	0	0	0	0.000754596	0.0719815	0	0.00583033	0	0	0	0	0	0	0	0	0	0	0	0	0	0	0	0	0	0	0	0	0	0	0	0	0	0
1.7	D.suzukii	Dsuz	8.33	Female	4	0.00831396	0.00115448	0	0	0	0.00217176	0.00301035	0	0	0.000486061	0	0	0	0	0.000712256	0.0622311	0	0.00602663	0	0	0	0	0	0	0	0	0	0	0	0	0	0	0	0	0	0	0	0	0	0	0	0	0	0
1.75	D.suzukii	Dsuz	9.1	Female	5	0.00810578	0.00102645	0	0	0	0.00209648	0.00202273	0	0	0.000423568	0	0	0	0	0.000703311	0.0628153	0	0.00581303	0	0	0	0	0	0	0	0	0	0	0	0	0	0	0	0	0	0	0	0	0	0	0	0	0	0
1.84	D.suzukii	Dsuz	8.9	Female	6	0.0072973	0.000922011	0	0	0	0.0016983	0.0018716	0	0	0.000422662	0	0	0	0	0.000683373	0.0573125	0	0.00365298	0	0	0	0	0	0	0	0	0	0	0	0	0	0	0	0	0	0	0	0	0	0	0	0	0	0
1.06	D.suzukii	Dsuz	5.5	Male	1	0.0174914	0.00229715	0	0	0	0.00168145	0.00218745	0	0	0.000470012	0	0	0	0	0.00141218	0.097485	0	0.00523006	0	0	0	0	0	0	0	0	0	0	0	0	0	0	0	0	0	0	0	0	0	0	0	0	0	0
1.02	D.suzukii	Dsuz	5.25	Male	2	0.0174404	0.00236114	0	0	0	0.00242819	0.00209836	0	0	0.000786276	0	0	0	0	0.00150017	0.104445	0	0.00664297	0	0	0	0	0	0	0	0	0	0	0	0	0	0	0	0	0	0	0	0	0	0	0	0	0	0
1.08	D.suzukii	Dsuz	10.11	Male	3	0.0133604	0.00212525	0	0	0	0.00175748	0.00185475	0	0	0.000607577	0	0	0	0	0.00122587	0.100632	0	0.00617327	0	0	0	0	0	0	0	0	0	0	0	0	0	0	0	0	0	0	0	0	0	0	0	0	0	0
1.17	D.suzukii	Dsuz	10.7	Male	4	0.0117122	0.00168882	0	0	0	0.0014838	0.00226322	0	0	0.000342736	0	0	0	0	0.0010349	0.0900403	0	0.00397185	0	0	0	0	0	0	0	0	0	0	0	0	0	0	0	0	0	0	0	0	0	0	0	0	0	0
1.23	D.suzukii	Dsuz	10.22	Male	5	0.0129115	0.00160644	0	0	0	0.00223004	0.00223091	0	0	0.000405051	0	0	0	0	0.00101687	0.0901196	0	0.00631893	0	0	0	0	0	0	0	0	0	0	0	0	0	0	0	0	0	0	0	0	0	0	0	0	0	0
1.14	D.suzukii	Dsuz	8.7	Male	6	0.010589	0.00161655	0	0	0	0.00101523	0.00142015	0	0	0.000671532	0	0	0	0	0.00118469	0.0918296	0	0.00326586	0	0	0	0	0	0	0	0	0	0	0	0	0	0	0	0	0	0	0	0	0	0	0	0	0	0
1.15	D.teissieri	Dtei	6.9	Female	1	0.00401219	0.00455177	0	0	0	0.00333119	0	0	0.00854348	0.00589508	0	0	0	0	0.00202307	0.169671	0.00229752	0.00806691	0	0.00224126	0	0	0	0	0	0	0	0	0	0	0	0	0	0	0	0	0	0	0	0	0	0	0	0
1.18	D.teissieri	Dtei	6.3	Female	2	0.00304888	0.00359034	0	0	0	0.00187336	0	0	0.00704746	0.00339419	0	0	0	0	0.00212274	0.13636	0.00165535	0.00517647	0	0.00143297	0	0	0	0	0	0	0	0	0	0	0	0	0	0	0	0	0	0	0	0	0	0	0	0
1.05	D.teissieri	Dtei	8.7	Female	3	0.00317733	0.00457279	0	0	0	0.0029882	0	0	0.00787905	0.00425767	0	0	0	0	0.00179566	0.159746	0.00242625	0.00891456	0	0.00250321	0	0	0	0	0	0	0	0	0	0	0	0	0	0	0	0	0	0	0	0	0	0	0	0
1.08	D.teissieri	Dtei	7.7	Female	4	0.00250017	0.00353407	0	0	0	0.00153672	0	0	0.00600741	0.00172597	0	0	0	0	0.00203408	0.143374	0.00174799	0.00658932	0	0.00141241	0	0	0	0	0	0	0	0	0	0	0	0	0	0	0	0	0	0	0	0	0	0	0	0
1.18	D.teissieri	Dtei	6.5	Female	5	0.00461306	0.00572548	0	0	0	0.0087175	0	0	0.00753305	0.00544244	0	0	0	0	0.00261043	0.17726	0.00353133	0.00829863	0	0.00254914	0	0	0	0	0	0	0	0	0	0	0	0	0	0	0	0	0	0	0	0	0	0	0	0
1.34	D.teissieri	Dtei	5.78	Female	6	0.00375541	0.00463472	0	0	0	0.00341249	0	0	0.00770746	0.00595062	0	0	0	0	0.00255791	0.163214	0.00294134	0.0081068	0	0.00313352	0	0	0	0	0	0	0	0	0	0	0	0	0	0	0	0	0	0	0	0	0	0	0	0
0.93	D.teissieri	Dtei	5.4	Male	1	0.00314382	0.00365053	0	0	0	0	0	0	0.0144667	0.00138109	0	0	0	0	0.00126048	0.15056	0.00175869	0.00283643	0	0	0	0	0	0	0	0	0	0	0	0	0	0	0	0	0	0	0	0	0	0	0	0	0	0
0.78	D.teissieri	Dtei	5.3	Male	2	0.00451274	0.00498971	0	0	0	0	0	0	0.0222372	0.00201902	0	0	0	0	0.00191059	0.215774	0.00255193	0.00915852	0	0	0	0	0	0	0	0	0	0	0	0	0	0	0	0	0	0	0	0	0	0	0	0	0	0
0.8	D.teissieri	Dtei	6.2	Male	3	0.00302992	0.0050604	0	0	0	0	0	0	0.00791	0	0	0	0	0	0.00270359	0.197361	0.00263568	0.00923302	0	0	0	0	0	0	0	0	0	0	0	0	0	0	0	0	0	0	0	0	0	0	0	0	0	0
0.76	D.teissieri	Dtei	6.4	Male	4	0.00358753	0.0052996	0	0	0	0.00143604	0	0	0.0146711	0.00252944	0	0	0	0	0.00142513	0.185814	0.00260526	0.00814086	0	0.00136599	0	0	0	0	0	0	0	0	0	0	0	0	0	0	0	0	0	0	0	0	0	0	0	0
0.87	D.teissieri	Dtei	3.4	Male	5	0.00270638	0.002028	0	0	0	0	0	0	0.0223391	0.000976313	0	0	0	0	0.00207159	0.145702	0.0012592	0.00580482	0	0.0007024	0	0	0	0	0	0	0	0	0	0	0	0	0	0	0	0	0	0	0	0	0	0	0	0
0.9	D.teissieri	Dtei	4.6	Male	6	0.00255335	0.00178964	0	0	0	0.000542675	0	0	0.0159133	0.000845207	0	0	0	0	0.0016381	0.118997	0.000984563	0.00350368	0	0	0	0	0	0	0	0	0	0	0	0	0	0	0	0	0	0	0	0	0	0	0	0	0	0
1.98	D.virilis	Dvir	18.75	Female	1	0	0	0	0	0	0	0	0	0.00268687	0.0244626	0.0124926	0	0	0	0	0	0	0.0068077	0	0.0087036	0.000889885	0	0	0	0	0	0	0	0	0	0	0.00109344	0	0.00738842	0	0.0348129	0.0116201	0.00267277	0	0	0	0	0	0
1.8	D.virilis	Dvir	17	Female	2	0	0	0	0	0	0	0	0	0.00280556	0.0286844	0.0186869	0	0	0	0	0	0	0.005561	0	0.011908	0.00153244	0	0	0	0	0	0	0	0	0	0	0.000749854	0	0.0036907	0	0.0471589	0.0229682	0.00618163	0	0	0	0	0	0
1.9	D.virilis	Dvir	20.9	Female	3	0	0	0	0	0	0	0	0	0.00382105	0.0448008	0.0268869	0	0	0	0	0	0	0.00093447	0	0.00755941	0	0	0	0	0	0	0	0	0	0	0	0	0	0.00579291	0	0.0671056	0.0394377	0.0119863	0	0	0	0	0	0
1.99	D.virilis	Dvir	15.5	Female	4	0	0	0	0	0	0	0	0	0.00270352	0.0215308	0.0101432	0	0	0	0	0	0	0.00399673	0	0.00877619	0.0011663	0	0	0	0	0	0	0	0	0	0	0.000573562	0	0.00251247	0	0.0236619	0.0137396	0.00169334	0	0	0	0	0	0
1.95	D.virilis	Dvir	20.35	Female	5	0	0	0	0	0	0	0	0	0.00410256	0.0394457	0.0234461	0	0	0	0	0	0	0.00890534	0	0.0160428	0.000878649	0	0	0	0	0	0	0	0	0	0	0.00108704	0	0.00939542	0	0.0541978	0.0266016	0.00732981	0	0	0	0	0	0
1.71	D.virilis	Dvir	13.9	Male	1	0	0	0	0	0	0	0	0	0.00351462	0.0318214	0.0167936	0	0	0.00767925	0	0.00138744	0	0.00503258	0	0.00818276	0.000945119	0	0	0	0	0	0	0	0	0	0	0	0	0.00810831	0	0.0477715	0.0180586	0.00277737	0	0	0	0	0	0
1.73	D.virilis	Dvir	15.4	Male	2	0	0	0	0	0	0	0	0	0.00161272	0.0211914	0.0124763	0	0	0	0	0	0	0.00119385	0	0.00588047	0.000927169	0	0	0	0	0	0	0	0	0	0	0	0	0.00238832	0	0.044277	0.0223807	0.00487611	0	0	0	0	0	0
1.8	D.virilis	Dvir	12.13	Male	3	0	0	0	0	0	0	0	0	0.00310556	0.0282186	0.0129305	0	0	0.00052823	0	0.000223672	0	0.00204323	0	0.00798581	0	0	0	0	0	0	0	0	0	0	0	0	0	0.0039286	0	0.0467321	0.0266646	0.00336723	0	0	0	0	0	0
2.06	D.virilis	Dvir	16.1	Male	4	0	0	0	0	0	0	0	0	0.00145146	0.0162807	0.00864927	0	0	0.00370808	0	0.000844587	0	0.00317492	0	0.00606211	0.000330333	0	0	0	0	0	0	0	0	0	0	0	0	0.00620257	0	0.038283	0.0148589	0.00161384	0	0	0	0	0	0
2.2	D.virilis	Dvir	14.18	Male	5	0	0	0	0	0	0	0	0	0.00202727	0.0263799	0.0134515	0	0	0	0	0	0	0.000580576	0	0.0036983	0	0	0	0	0	0	0	0	0	0	0	0	0	0.000783851	0	0.0288496	0.0251794	0.00736039	0	0	0	0	0	0
0.9	D.willistoni	Dwil	8.8	Female	1	0	0	0	0	0	0	0	0	0	0.00144468	0.0103171	0	0	0	0	0	0	0	0	0	0	0	0	0	0.00148259	0	0	0	0	0	0	0	0	0	0	0	0	0.0127904	0	0.0213991	0	0	0	0
0.96	D.willistoni	Dwil	8.8	Female	2	0	0	0	0	0	0	0	0	0	0.00213918	0.0114498	0	0	0	0	0	0	0	0	0	0	0	0	0	0.00108367	0	0	0	0	0	0	0	0	0	0	0	0	0.0159252	0	0.025229	0	0	0	0
0.88	D.willistoni	Dwil	10.3	Female	3	0	0	0	0	0	0	0	0	0	0.00110468	0.0106215	0	0	0	0	0	0	0	0	0	0	0	0	0	0.000873789	0	0	0	0	0	0	0	0	0	0	0	0	0.0121559	0	0.032686	0	0	0	0
0.87	D.willistoni	Dwil	10.1	Female	4	0	0	0	0	0	0	0	0	0	0.00365943	0.0304106	0	0	0	0	0	0	0	0	0	0	0	0	0	0.00119577	0	0	0	0	0	0	0	0	0	0	0	0	0.0340276	0	0.0723045	0	0	0	0
1.06	D.willistoni	Dwil	10.5	Female	5	0	0	0	0	0	0	0	0	0	0.00361107	0.0203767	0	0	0	0	0	0	0	0	0	0	0	0	0	0.00108811	0	0	0	0	0	0	0	0	0	0	0	0	0.0247919	0	0.038855	0	0	0	0
0.67	D.willistoni	Dwil	8.1	Male	1	0	0	0	0	0	0	0	0	0	0.00591254	0.0141341	0	0	0	0	0	0	0	0	0	0	0	0	0	0.00293667	0	0	0	0	0	0	0	0	0	0	0	0	0.0351387	0	0.016799	0	0	0	0
0.7	D.willistoni	Dwil	8.8	Male	2	0	0	0	0	0	0	0	0	0	0.0117523	0.0379717	0	0	0	0	0	0	0	0	0	0	0	0	0	0.00358621	0	0	0	0	0	0	0	0	0	0	0	0	0.0903336	0	0.0345998	0	0	0	0
0.62	D.willistoni	Dwil	8.4	Male	3	0	0	0	0	0	0	0	0	0	0.010858	0.031267	0	0	0	0	0	0	0	0	0	0	0	0	0	0.00277225	0	0	0	0	0	0	0	0	0	0	0	0	0.0759815	0	0.0363748	0	0	0	0
0.66	D.willistoni	Dwil	9.8	Male	4	0	0	0	0	0	0	0	0	0	0.00265124	0.0165145	0	0	0	0	0	0	0	0	0	0	0	0	0	0.00174758	0	0	0	0	0	0	0	0	0	0	0	0	0.0229241	0	0.0123165	0	0	0	0
0.63	D.willistoni	Dwil	8.8	Male	5	0	0	0	0	0	0	0	0	0	0.0144275	0.0341626	0	0	0	0	0	0	0	0	0	0	0	0	0	0.00290773	0	0	0	0	0	0	0	0	0	0	0	0	0.0717959	0	0.0177995	0	0	0	0
1.18	D.yakuba	Dyak	8.2	Female	1	0.00225671	0.00180363	0	0	0	0.00143003	0	0	0.00294152	0.00358573	0	0	0	0	0.0011902	0.0848119	0.000946894	0.00235525	0	0.0017076	0	0	0	0	0	0	0	0	0	0	0	0	0	0	0	0	0	0	0	0	0	0	0	0
1.2	D.yakuba	Dyak	8.3	Female	2	0.00258369	0.00215223	0	0	0	0.00170711	0	0	0.00343167	0.00468847	0	0	0	0	0.00147584	0.097667	0.00175847	0.00315845	0	0.00268123	0	0	0	0	0	0	0	0	0	0	0	0	0	0	0	0	0	0	0	0	0	0	0	0
1.01	D.yakuba	Dyak	8.67	Female	3	0.00289862	0.00335743	0	0	0	0.00306186	0	0	0.00654554	0.00767472	0	0	0	0	0.00190235	0.137956	0.00325238	0.00603969	0	0.00362908	0	0	0	0	0	0	0	0	0	0	0	0	0	0	0	0	0	0	0	0	0	0	0	0
1.24	D.yakuba	Dyak	9.3	Female	4	0.00191697	0.0015334	0	0	0	0.00130577	0	0	0.00284032	0.00316038	0	0	0	0	0.00112617	0.0836592	0.000734814	0.00193154	0	0.00161564	0	0	0	0	0	0	0	0	0	0	0	0	0	0	0	0	0	0	0	0	0	0	0	0
1.22	D.yakuba	Dyak	6.4	Female	5	0.00218588	0.00179302	0	0	0	0.00158995	0	0	0.00297623	0.00309764	0	0	0	0	0.00137749	0.0914888	0.000874761	0.0023003	0	0.00195139	0	0	0	0	0	0	0	0	0	0	0	0	0	0	0	0	0	0	0	0	0	0	0	0
1.2	D.yakuba	Dyak	6.8	Female	6	0.00177582	0.00188001	0	0	0	0.0015229	0	0	0.00321333	0.00329712	0	0	0	0	0.00138437	0.0895489	0.0015011	0.00283762	0	0.00140523	0	0	0	0	0	0	0	0	0	0	0	0	0	0	0	0	0	0	0	0	0	0	0	0
0.67	D.yakuba	Dyak	3.6	Male	1	0.00390164	0.0038031	0	0	0	0	0	0	0.0166358	0.00214375	0	0	0	0	0.00270388	0.195587	0.00359236	0.0102565	0	0.00188633	0	0	0	0	0	0	0	0	0	0	0	0	0	0	0	0	0	0	0	0	0	0	0	0
0.64	D.yakuba	Dyak	4.1	Male	2	0.00384562	0.00359051	0	0	0	0.00158052	0	0	0.0155828	0.00209234	0	0	0	0	0.00250109	0.185127	0.00314048	0.0085038	0	0.002114	0	0	0	0	0	0	0	0	0	0	0	0	0	0	0	0	0	0	0	0	0	0	0	0
0.66	D.yakuba	Dyak	4.27	Male	3	0.00360741	0.00303213	0	0	0	0	0	0	0.0159394	0.00196266	0	0	0	0	0.00249485	0.167324	0.00158513	0.00823924	0	0.00157998	0	0	0	0	0	0	0	0	0	0	0	0	0	0	0	0	0	0	0	0	0	0	0	0
0.64	D.yakuba	Dyak	4.2	Male	4	0.0019193	0.00378178	0	0	0	0.00317732	0	0	0.00251719	0.00173729	0	0	0	0	0.00194495	0.14734	0.0037557	0.00881236	0	0.00531845	0	0	0	0	0	0	0	0	0	0	0	0	0	0	0	0	0	0	0	0	0	0	0	0
0.67	D.yakuba	Dyak	3.4	Male	5	0.00296195	0.00244471	0	0	0	0	0	0	0.0152701	0	0	0	0	0	0.00209717	0.138181	0.00128031	0.00604089	0	0	0	0	0	0	0	0	0	0	0	0	0	0	0	0	0	0	0	0	0	0	0	0	0	0
0.65	D.yakuba	Dyak	4	Male	6	0.00355913	0.0029969	0	0	0	0	0	0	0.0153215	0	0	0	0	0	0.00271338	0.176321	0.00160828	0.00786847	0	0	0	0	0	0	0	0	0	0	0	0	0	0	0	0	0	0	0	0	0	0	0	0	0	0
0.62	S.latifasciaeformis	Slat	12.89	Female	1	0	0	0	0	0	0	0	0	0	0.00123475	0.00334738	0	0	0	0	0	0	0	0	0	0	0.00646171	0.044755	0	0.00390304	0	0	0	0	0	0	0	0	0	0	0	0	0	0	0	0	0	0	0
0.6	S.latifasciaeformis	Slat	12.7	Female	2	0	0	0	0	0	0	0	0	0	0.00204551	0.00743037	0	0	0	0	0	0	0	0	0	0	0.0190023	0.0833797	0	0.00354313	0	0	0	0	0	0	0	0	0	0	0	0	0	0	0	0	0	0	0
0.62	S.latifasciaeformis	Slat	17.11	Female	3	0	0	0	0	0	0	0	0	0	0.00145034	0.00557897	0	0	0	0	0	0	0	0	0	0	0.0123259	0.064634	0	0.0028452	0	0	0	0	0	0	0	0	0	0	0	0	0	0	0	0	0	0	0
0.63	S.latifasciaeformis	Slat	17.7	Female	4	0	0	0	0	0	0	0	0	0	0.00135017	0.00448994	0	0	0	0	0	0	0	0	0	0	0.00969116	0.0533695	0	0.00244106	0	0	0	0	0	0	0	0	0	0	0	0	0	0	0	0	0	0	0
0.61	S.latifasciaeformis	Slat	16.67	Female	5	0	0	0	0	0	0	0	0	0	0.00159364	0.00516639	0	0	0	0	0	0	0	0	0	0	0.0118307	0.0700509	0	0.00456022	0	0	0	0	0	0	0	0	0	0	0	0	0	0	0	0	0	0	0
0.44	S.latifasciaeformis	Slat	10.3	Male	1	0	0	0	0	0	0	0	0	0	0.00320359	0.00307463	0	0	0	0	0	0	0	0	0.0258565	0	0.0153415	0.00165451	0	0	0	0	0	0	0	0	0	0	0	0	0	0	0	0	0	0	0	0	0
0.44	S.latifasciaeformis	Slat	14.4	Male	2	0	0	0	0	0	0	0	0	0	0.00378355	0.00328427	0	0	0	0	0	0	0	0	0.0449004	0	0.0235112	0.00207776	0	0	0	0	0	0	0	0	0	0	0	0	0	0	0	0	0	0	0	0	0
0.42	S.latifasciaeformis	Slat	13.6	Male	3	0	0	0	0	0	0	0	0	0	0.00381905	0.00281841	0	0	0	0	0	0	0	0	0.0375592	0	0.0216581	0.00185423	0	0	0	0	0	0	0	0	0	0	0	0	0	0	0	0	0	0	0	0	0
0.42	S.latifasciaeformis	Slat	11.2	Male	4	0	0	0	0	0	0	0	0	0	0.00379012	0.0026354	0	0	0	0	0	0	0	0	0.0426295	0	0.0236835	0.00209608	0	0	0	0	0	0	0	0	0	0	0	0	0	0	0	0	0	0	0	0	0
0.41	S.latifasciaeformis	Slat	9.4	Male	5	0	0	0	0	0	0	0	0	0	0.0041493	0.00273717	0	0	0	0	0	0	0	0	0.051545	0	0.0191412	0.00136265	0	0	0	0	0	0	0	0	0	0	0	0	0	0	0	0	0	0	0	0	0
1.28	S.lebanonensis	Sleb	33.3	Female	1	0	0	0	0	0	0	0	0	0.00199219	0.0130534	0.00423963	0	0	0	0	0	0	0	0	0	0	0.00495209	0.00481444	0	0.00125446	0	0	0	0	0	0	0	0	0	0	0	0.00173267	0.0190603	0	0	0	0	0	0
1.47	S.lebanonensis	Sleb	37.4	Female	2	0	0	0	0	0	0	0	0	0.00153742	0.0132014	0.00312692	0	0	0	0	0	0	0	0	0	0	0.00381735	0.00537841	0	0.00180003	0	0	0	0	0	0	0	0	0	0	0	0.00104804	0.0262346	0	0	0	0	0	0
1.32	S.lebanonensis	Sleb	34.4	Female	3	0	0	0	0	0	0	0	0	0.00266667	0.0149132	0.00363366	0	0	0	0	0	0	0	0	0	0	0.00298308	0.00650262	0	0.00246717	0	0	0	0	0	0	0	0	0	0	0	0.0042966	0.0550218	0	0	0	0	0	0
1.29	S.lebanonensis	Sleb	24.4	Female	4	0	0	0	0	0	0	0	0	0.00316279	0.0202997	0.00498138	0	0	0	0	0	0	0	0	0	0	0.00329707	0.00860931	0	0.00164797	0	0	0	0	0	0	0	0	0	0	0	0.00858306	0.0344945	0	0	0	0	0	0
1.39	S.lebanonensis	Sleb	33.6	Female	5	0	0	0	0	0	0	0	0	0.00230935	0.0159631	0.0028645	0	0	0	0	0	0	0	0	0	0	0.00215178	0.00567578	0	0.00211514	0	0	0	0	0	0	0	0	0	0	0	0.00377573	0.0442661	0	0	0	0	0	0
1.11	S.lebanonensis	Sleb	32.22	Male	1	0	0	0	0	0	0	0	0	0.000738739	0.0187199	0.00337933	0	0	0	0	0	0	0	0	0	0	0.00330023	0.0109816	0.0026538	0.00321917	0.00136512	0.00041311	0	0	0	0	0	0	0	0	0	0.0381151	0.024099	0	0.00105155	0	0	0	0
1.14	S.lebanonensis	Sleb	33.11	Male	2	0	0	0	0	0	0	0	0	0.0012193	0.020082	0.00360056	0	0	0	0	0	0	0	0	0	0	0.00193766	0.0122222	0.00302379	0.00335268	0.00196823	0.000694775	0	0	0	0	0	0	0	0	0	0.0366666	0.0235994	0	0.00175522	0	0	0	0
1.09	S.lebanonensis	Sleb	36.1	Male	3	0	0	0	0	0	0	0	0	0.0010367	0.0216498	0.00396318	0	0	0	0	0	0	0	0	0	0	0.00371323	0.0163552	0.00433166	0.00514559	0.00834102	0.00042069	0	0	0	0	0	0	0	0	0	0.0490812	0.0249166	0	0.00263887	0	0	0	0
0.93	S.lebanonensis	Sleb	34.8	Male	4	0	0	0	0	0	0	0	0	0.0024086	0.0430007	0.00894289	0	0	0	0	0	0	0	0	0	0	0.00466187	0.0138352	0.00575081	0.0237343	0.011092	0.000986132	0	0	0	0	0	0	0	0	0	0.0415056	0.0328331	0	0.00439277	0	0	0	0
1.16	S.lebanonensis	Sleb	32.3	Male	5	0	0	0	0	0	0	0	0	0.00136207	0.0253716	0.0045987	0	0	0	0	0	0	0	0	0	0	0.00292143	0.015091	0.0043224	0.00549796	0.0073855	0.000682796	0	0	0	0	0	0	0	0	0	0.0452729	0.0273813	0	0.0025515	0	0	0	0
1.7	S.rufifrons	Sruf	54.89	Female	1	0	0	0	0	0	0	0	0	0.000682353	0.0159685	0.0019533	0	0	0	0	0	0	0	0	0	0	0.000992687	0.0307128	0	0	0	0	0	0	0	0	0	0	0	0	0	0.0139124	0.094953	0	0.00951433	0	0.00327984	0	0
1.71	S.rufifrons	Sruf	41.6	Female	2	0	0	0	0	0	0	0	0	0.000210526	0.0116541	0.000845075	0	0	0	0	0	0	0	0	0	0	0.000264773	0.00276225	0	0	0	0	0	0	0	0	0	0	0	0	0	0.00298006	0.108067	0	0.0085567	0	0.00404038	0	0
1.71	S.rufifrons	Sruf	55.8	Female	3	0	0	0	0	0	0	0	0	0.000555556	0.0123647	0.00159126	0	0	0	0	0	0	0	0	0	0	0.0015084	0.035533	0	0	0	0	0	0	0	0	0	0	0	0	0	0.0252364	0.0389136	0	0.00307164	0	0	0	0
1.7	S.rufifrons	Sruf	57.6	Female	4	0	0	0	0	0	0	0	0	0.000494118	0.0146319	0.00151019	0	0	0	0	0	0	0	0	0	0	0.000677933	0.0120202	0	0	0	0	0	0	0	0	0	0	0	0	0	0.0100285	0.0917939	0	0.00544377	0	0.00356505	0	0
1.52	S.rufifrons	Sruf	49.33	Female	5	0	0	0	0	0	0	0	0	0.000572368	0.0132947	0.00138561	0	0	0	0	0	0	0	0	0	0	0.000704056	0.00770756	0	0	0	0	0	0	0	0	0	0	0	0	0	0.00660489	0.0853685	0	0.00734999	0	0.0035885	0	0
1.64	S.rufifrons	Sruf	44.33	Male	1	0	0	0	0	0	0	0	0	0.000292683	0.00980273	0.000496816	0	0	0	0	0	0	0	0	0	0	0	0.000681325	0	0	0	0	0	0	0	0	0	0	0	0	0	0	0.0343683	0	0.00564293	0	0.013082	0	0.0291297
1.68	S.rufifrons	Sruf	53.2	Male	2	0	0	0	0	0	0	0	0	0.000255952	0.00859287	0.000503288	0	0	0	0	0	0	0	0	0	0	0	0.000685258	0	0	0	0	0	0	0	0	0	0	0	0	0	0	0.0318451	0	0.00468973	0	0.0121212	0	0.0293294
1.71	S.rufifrons	Sruf	48.9	Male	3	0	0	0	0	0	0	0	0	0.000339181	0.0105811	0.000521429	0	0	0	0	0	0	0	0	0	0	0	0.000693037	0	0	0	0	0	0	0	0	0	0	0	0	0	0	0.0527921	0	0.00570447	0	0.0148147	0	0.0326179
1.72	S.rufifrons	Sruf	58.89	Male	4	0	0	0	0	0	0	0	0	0.00127907	0.0173159	0.00146581	0	0	0	0	0	0	0	0	0	0	0	0.000718536	0	0	0	0	0	0	0	0	0	0	0	0	0	0	0.0213212	0	0.00477456	0	0.020014	0	0.0677648
1.7	S.rufifrons	Sruf	54	Male	5	0	0	0	0	0	0	0	0	0.000817647	0.015604	0.00110325	0	0	0	0	0	0	0	0	0	0	0	0.000717031	0	0	0	0	0	0	0	0	0	0	0	0	0	0	0.035472	0	0.00470812	0	0.021319	0	0.0545848
[truncated: 7 more columns]
